# Supplementary material for: Palladium-catalyzed enantioselective decarboxylative allylic alkylation of α-benzyl cyanoacetates: access to chiral acyclic quaternary carbon stereocenters
Source: Royal Society of Chemistry journal article supplement (doi:10.1039/d3qo01605f), 2023-01-01
Supplement: d3qo01605f1.pdf [file d3qo01605f1.pdf]

**Palladium-catalyzed enantioselective decarboxylative allylic  
alkylation of  $\alpha$ -benzyl cyanoacetates: access to chiral acyclic  
quaternary carbon stereocenters**

Qing Bao,<sup>a,c,#</sup> Ting-Jia Sun,<sup>a,b,#</sup> Yan-Ping Zhang,<sup>a</sup> Zhen-Hua Wang,<sup>a</sup> Yong You,<sup>a</sup> Zhen-Zhen Ge,<sup>a,b</sup>  
Ming-Qiang Zhou,<sup>a,b</sup> Jian-Qiang Zhao,<sup>a,\*</sup> and Wei-Cheng Yuan<sup>a,b,\*</sup>

<sup>a</sup>Innovation Research Center of Chiral Drugs, Institute for Advanced Study, Chengdu University,  
Chengdu, 610106, China

<sup>b</sup>National Engineering Research Center of Chiral Drugs, Chengdu Institute of Organic Chemistry,  
Chinese Academy of Sciences, Chengdu, 610041, China

<sup>c</sup>School of Pharmacy, Zunyi Medical University, Zunyi, 563006, China

<sup>#</sup>These authors contributed equally.

E-mail: zhaojianqiang@cdu.edu.cn;  
yuanwc@cioc.ac.cn

**Supporting Information**

|                                                                                                      |     |
|------------------------------------------------------------------------------------------------------|-----|
| 1. General experimental information.....                                                             | S1  |
| 2. General experimental procedures for synthesis of alkenyl carbamate 1.....                         | S1  |
| 3. General experimental procedures synthesis of $\alpha$ -substituted cyanoacetates 2.....           | S4  |
| 4. General experimental procedures for asymmetric synthesis of compounds 3 .....                     | S7  |
| 5. Scale-up experiment.....                                                                          | S15 |
| 6. The procedure for the synthesis of compound 5 .....                                               | S15 |
| 7. The procedure for the synthesis of compound 6.....                                                | S16 |
| 8. X-ray crystal structure of compound 6.....                                                        | S17 |
| 9. The copies of <sup>1</sup> H NMR, <sup>13</sup> C NMR and HPLC spectra for compounds 3, 5, 6..... | S19 |

## 1. General experimental information

Chemical reagents were purchased from commercial sources and were used as received unless mentioned otherwise. Reactions were monitored by thin-layer chromatography (TLC).  $^1\text{H}$  NMR (400 MHz) and  $^{13}\text{C}$  NMR (101 MHz) spectra were recorded in  $\text{DMSO-}d_6$ .  $^1\text{H}$  NMR chemical shifts are reported in ppm relative to tetramethylsilane (TMS), with the solvent resonance employed as the internal standard ( $\text{DMSO-}d_6$  at 2.50 ppm). Data are reported as follows: chemical shift, multiplicity (s = singlet, brs = broad singlet, d = doublet, t = triplet, q = quartet, m = multiplet), coupling constants (Hz) and integration.  $^{13}\text{C}$  NMR chemical shifts are reported in ppm from tetramethylsilane (TMS) with the solvent resonance as the internal standard ( $\text{DMSO-}d_6$  at 39.51 ppm). Melting points were recorded on a Büchi Melting Point B-545 unit. The HRMS were recorded by The HRMS were recorded by Agilent 6545 LC/Q-TOF mass spectrometer.

## 2. General experimental procedures for synthesis of alkenyl carbamate 1

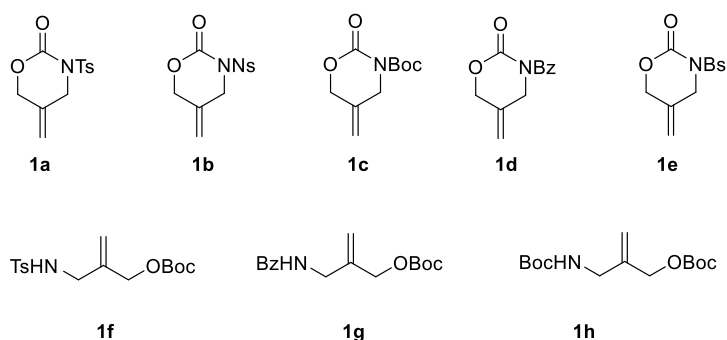

### 2-(Iodomethyl)-prop-2-en-1-ol (S2) [1,2].

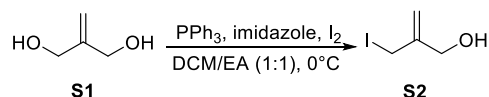

To a stirring solution of 2-methylenepropane-1,3-diol (5.7 g, 65 mmol), triphenylphosphine (18.6 g, 71 mmol) and imidazole (4.8 g, 71 mmol) in a 1:1 mixture of dichloromethane/ethyl acetate (100 mL) at 0 °C was added iodine (16.4 g, 65 mmol) portion-wise during 1 h. The reaction mixture was left to stir for 9 h at 0 °C before being diluted in ethyl acetate (50 mL) followed by washing with water (100 mL). The aqueous layer was extracted with ethyl acetate (25 × 3 mL) and the organic layers combined, dried over anhydrous  $\text{Na}_2\text{SO}_4$  and concentrated to yield crude material which was purified by flash column chromatography on silica gel (20% ethyl acetate in petroleum ether) to furnish the product S2 as a colorless oil.

### 5-methylene-3-tosyl-1,3-oxazinane-2-one (1a)

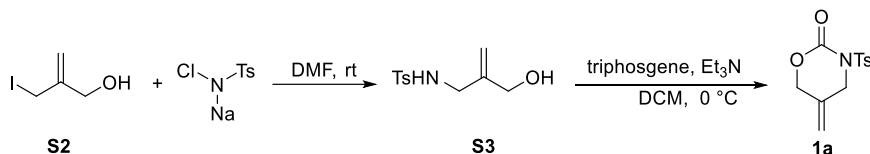

To a solution of S2 (5.0 g, 25 mmol) in DMF (80 mL) was added chloramine-T (8.6 g, 37 mmol). And the reaction mixture was stirred for 30 minutes at room temperature. Then the reaction was quenched by aq.  $\text{Na}_2\text{S}_2\text{O}_3$  (1 M, 100 mL). The mixture was extracted with ethyl acetate and the

organic layer was washed with water, dried over anhydrous Na<sub>2</sub>SO<sub>4</sub>. After evaporation of solvent, the obtained crude product **S3** is proceeded directly to the next step without purification.

A solution of triphosgene (7.4 g, 25 mmol) in CH<sub>2</sub>Cl<sub>2</sub> (100 mL) was slowly added to a solution of *N*-(2-(hydroxymethyl)allyl)-4-methylbenzenesulfonamide **S3** (4.6 g, 25 mmol) and triethylamine (35 mL, 250 mmol, 10 equiv) in CH<sub>2</sub>Cl<sub>2</sub> (100 mL) at 0 °C over 30 min. The resulting mixture was stirred for 1 h. After completion of the reaction, as indicated by TLC, the reaction was quenched with aq. NH<sub>4</sub>Cl and extracted with CH<sub>2</sub>Cl<sub>2</sub> (80 mL × 3). The organic layer was dried over Na<sub>2</sub>SO<sub>4</sub>, filtered, and concentrated under vacuum. The residue was chromatographed on silica gel with (PE/EA/DCM = 1:1:1) and the crude product thus obtained was purified by the recrystallization to afford compound **1a** as a white solid.

**5-methylene-3-tosyl-1,3-oxazinan-2-one (1a)**: White solid;

<sup>1</sup>H NMR (600 MHz, CDCl<sub>3</sub>) δ 8.08 – 7.78 (m, 2H), 7.33 (d, *J* = 8.1 Hz, 2H), 5.35 – 5.29 (m, 1H), 5.30-5.25 (m, 1H), 4.66 (s, 2H), 4.50 (t, *J* = 1.6 Hz, 2H), 2.43 (s, 3H).

**5-methylene-3-((4-nitrophenyl)sulfonyl)-1,3-oxazinan-2-one (1b)** <sup>[1,2]</sup>

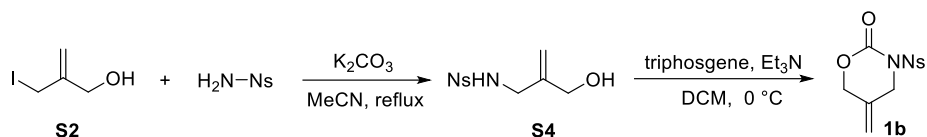

In a reaction tube equipped with a magnetic stirring bar, the solution of **S2** (2.0 g, 10 mmol) in MeCN (40 mL) was at 80 °C, followed by addition of K<sub>2</sub>CO<sub>3</sub> (2.8 g, 20 mmol, 2.0 equiv) and NsNH<sub>2</sub> (2.0 g, 10 mmol, 1.0 equiv). The resulting mixture was stirred for 1 h, filtered, and thus the filtrate obtained was concentrated in vacuo. Then the residue was purified by column chromatography (PE/EA/CH<sub>2</sub>Cl<sub>2</sub> = 1:1:1) to afford the compound **S4** as a white solid (1.2 g, 44% yield).

A solution of triphosgene (445 mg, 1.5 mmol, 1.5 equiv) in CH<sub>2</sub>Cl<sub>2</sub> (10 mL) was slowly added to a solution of *N*-(2-(hydroxymethyl)allyl)-4-nitrobenzenesulfonamide **S4** (272 mg, 1.0 mmol) and triethylamine (1.4 mL, 10 mmol, 10 equiv) in CH<sub>2</sub>Cl<sub>2</sub> (10 mL) at 0 °C over 30 min. The resulting mixture was stirred for 30 min. After completion of the reaction, as indicated by TLC. The reaction was quenched with aq. NH<sub>4</sub>Cl and extracted with CH<sub>2</sub>Cl<sub>2</sub> (30 mL × 3). The organic layer was dried over anhydrous Na<sub>2</sub>SO<sub>4</sub>, filtered, and concentrated under vacuum. The residue was chromatographed on silica gel with (PE/EA = 1:3) and the crude product thus obtained was purified by the recrystallization to afford compound **1b** as a white solid.

**5-methylene-3-((4-nitrophenyl)sulfonyl)-1,3-oxazinan-2-one (1b)**: White solid;

<sup>1</sup>H NMR (600 MHz, CDCl<sub>3</sub>) δ 8.42 – 8.34 (m, 2H), 8.32 – 8.19 (m, 2H), 5.39 (t, *J* = 1.6 Hz, 1H), 5.37 – 5.33 (m, 1H), 4.72 (t, *J* = 0.9 Hz, 2H), 4.55 (t, *J* = 1.6 Hz, 2H).

**3-((λ<sup>1</sup>-methyl)(λ<sup>1</sup>-oxidaneyl)boraneyl)-5-methylene-1,3-oxazinan-2-one (1c)** <sup>[1]</sup>

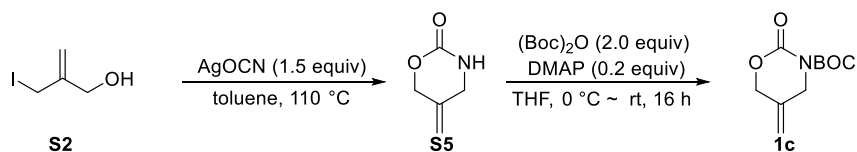

A solution of **S2** (5 g, 25 mmol, 1.0 equiv) in dry toluene (20 mL) was added AgOCN (5.7 g, 11 mmol, 1.5 equiv). the resulting mixture was refluxed in toluene (50 mL) for 14 h. Then, the mixture was filtered and the precipitate was washed with ethyl acetate, and concentrated in vacuo.

The product was obtained after purification by column chromatography on silica gel (PE/EA = 1:1) to provide **S5** as a white solid.

A solution of **S5** (452 mg, 4 mmol) in THF (10 mL), DMAP (0.98 g, 0.8 mmol) was added, followed by adding dropwise the solution of di(*tert*-butyl) carbonate (1.74 g, 8 mmol) at 0 °C. After completion of the reaction, as indicated by TLC, the reaction was quenched with aq. NH<sub>4</sub>Cl and extracted with ethyl acetate (20 mL × 2). The organic layer was dried over anhydrous Na<sub>2</sub>SO<sub>4</sub>, filtered, and concentrated under vacuum. The residue was chromatographed on silica gel with petroleum ether / ethyl acetate = 5/1 to afford compound **1c** as a yellow oil.

**3-(( $\lambda^1$ -methyl)( $\lambda^1$ -oxidaneyl)boraneyl)-5-methylene-1,3-oxazinan-2-one** (**1c**): White solid;  
<sup>1</sup>H NMR (400 MHz, CDCl<sub>3</sub>)  $\delta$  5.18 (d,  $J$  = 6.1 Hz, 2H), 4.63 (s, 2H), 4.28 (s, 2H), 1.51 (s, 9H).  
**3-benzoyl-5-methylene-1,3-oxazinan-2-one** (**1d**)<sup>[1]</sup>

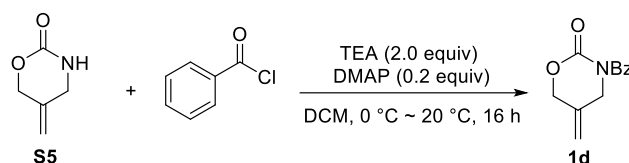

A solution of **S5** (452 mg, 4 mmol) in DCM (10 mL), DMAP (0.12 g, 1.0 mmol) was added, followed by adding dropwise the solution of triethylamine (1.1 mL, 8 mmol) at 0 °C. After completion of the reaction, as indicated by TLC, the reaction mixture was quenched with HCl (1M, 30 mL), concentrated under reduced pressure, diluted with water, and extracted with DCM (15 mL × 3). The combined organic layers were dried over anhydrous Na<sub>2</sub>SO<sub>4</sub>, filtered, and concentrated under vacuo. The product was obtained after purification by column chromatography on silica gel (PE/EA = 2:1) to give the desired product **1d** as a white solid. Compound **1e** was prepared by the same method.

**3-benzoyl-5-methylene-1,3-oxazinan-2-one** (**1d**): White solid;  
<sup>1</sup>H NMR (400 MHz, CDCl<sub>3</sub>)  $\delta$  7.60 (d,  $J$  = 7.7 Hz, 2H), 7.53 – 7.50 (m, 1H), 7.46 – 7.38 (m, 2H), 5.35 – 5.27 (m, 2H), 4.84 (s, 2H), 4.50 (d,  $J$  = 2.1 Hz, 2H).  
**5-methylene-3-(phenylsulfonyl)-1,3-oxazinan-2-one** (**1e**): White solid;  
<sup>1</sup>H NMR (400 MHz, CDCl<sub>3</sub>)  $\delta$  8.16–7.96 (m, 2H), 7.70 – 7.62 (m, 1H), 7.62 – 7.50 (m, 2H), 5.32 (d,  $J$  = 1.8 Hz, 1H), 5.30 – 5.25 (m, 1H), 4.67 (s, 2H), 4.52 (t,  $J$  = 1.7 Hz, 2H);

***tert*-butyl (2-(((4-methylphenyl)sulfonamido)methyl)allyl) carbonate** (**1f**)<sup>[1,2]</sup>

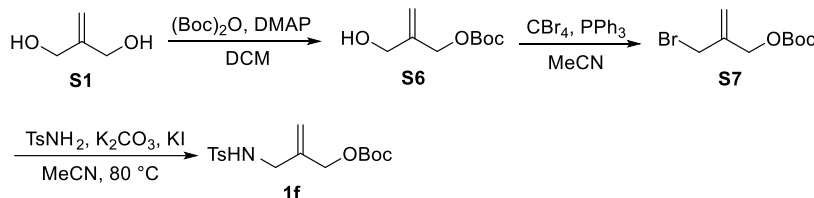

To a solution of **S1** (4.0 g, 45 mmol) in DCM (40 mL) was added DMAP (0.6 g, 5 mmol), followed by adding dropwise the solution of di(*tert*-butyl) carbonate (11.4 mL, 49.5 mmol) in CH<sub>2</sub>Cl<sub>2</sub> (50 mL) at 0 °C. After completion of the reaction, as indicated by TLC, the solution was concentrated under reduced pressure and the mixture was dissolved in MeCN (50 mL) followed by adding CBr<sub>4</sub> (15.7 g) at room temperature. Then the mixture was added PPh<sub>3</sub> in partially. After completion monitored by TLC, the reaction was concentrated in vacuo and purified by column chromatography (PE/EA = 100:1) to afford the product **S7**.

The solution of **S7** (5 mmol, 1.25 g) in CH<sub>3</sub>CN (20.0 mL) was heated with oil bath and refluxed

at 82 °C, followed by addition of K<sub>2</sub>CO<sub>3</sub> (1.4 g, 10 mmol, 2.0 equiv), KI (10 mg) and TsNH<sub>2</sub> (1.7 g, 10.0 mmol). Maintaining the reaction stirring at the same temperature until **S7** consumed as monitored by TLC. Then, the suspension was filtered through a short of celite column and the filtrate was concentrated, purified by column chromatography (PE/EA = 5:1) to afford the product **1f** as a white solid.

**tert-butyl (2-(((4-methylphenyl)sulfonamido)methyl)allyl) carbonate (1f)**: White solid;

<sup>1</sup>H NMR (400 MHz, CDCl<sub>3</sub>) δ 7.74 (d, *J* = 7.8 Hz, 2H), 7.29 (d, *J* = 7.8 Hz, 2H), 5.16 (s, 2H), 4.86 (t, *J* = 6.5 Hz, 1H), 4.45 (s, 2H), 3.60 (d, *J* = 6.5 Hz, 2H), 2.42 (s, 3H), 1.46 (s, 9H).

**2-(benzamidomethyl)allyl tert-butyl carbonate (1g)**

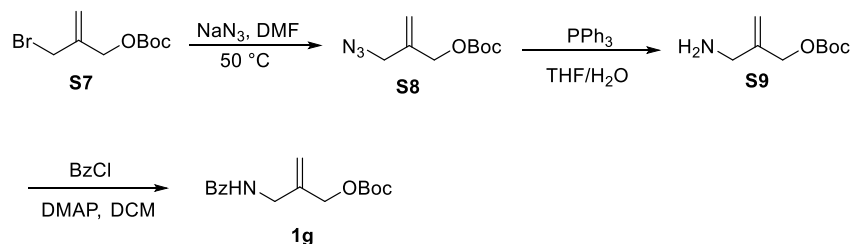

To a stirring solution of **S7** (2.0 g, 8 mmol, 1.0 equiv) was dissolved in dry DMF (40 mL), NaN<sub>3</sub> (1.0 g, 16.0 mmol, 2.0 equiv) was added dropwise for 10 min at 0 °C. The reaction was heated at 50 °C for 12h. After completion of the reaction (confirmed by TLC analysis), a precipitate mixture formed upon cooling the reaction mixture to room temperature, then quenched by water. The aqueous phase was extracted by ethyl acetate (20 mL × 3), and the combined extracts washed with brine. The organic phase was dried over anhydrous Na<sub>2</sub>SO<sub>4</sub> and evaporated in vacuo. The obtained crude product **S8** is proceeded directly to the next step without purification.

To a solution of **S8** (0.7 g, 3.4 mmol) in THF (20 mL) was heated with oil bath and added PPh<sub>3</sub> (2.52 g, 9.6 mmol) in partially at 50 °C for 5 h. The solution was cooled to room temperature and added H<sub>2</sub>O (1 mL). Maintaining the reaction stirring at 3 hours until **S8** consumed as monitored by TLC. The solvent was concentrated under reduced pressure. The DCM (40 mL), DMAP (0.6 g, 5 mmol) was added, followed by adding dropwise the solution of benzoyl chloride (0.3 mL, 2.7 mmol) in CH<sub>2</sub>Cl<sub>2</sub> (5 mL) at 0 °C. After completion of the reaction, as indicated by TLC, the solution was concentrated under reduced pressure and the residue was purified by flash chromatography on silica gel (PE/EA = 10:1 to 5:1) to give the desired product **1g** as colorless oil. Compound **1h** was prepared by the same method.

**2-(benzamidomethyl)allyl tert-butyl carbonate (1g)**: White solid;

<sup>1</sup>H NMR (400 MHz, CDCl<sub>3</sub>) δ 7.81 (d, *J* = 7.5 Hz, 2H), 7.65 – 7.31 (m, 3H), 6.61 (d, *J* = 6.3 Hz, 1H), 5.28 (s, 2H), 4.63 (s, 2H), 4.14 (d, *J* = 5.7 Hz, 2H), 1.49 (s, 9H).

**tert-butyl (2-(((tert-butoxycarbonyloxy)methyl)allyl)carbamate (1h)**

<sup>1</sup>H NMR (400 MHz, CDCl<sub>3</sub>) δ 5.17 (d, *J* = 11.3 Hz, 2H), 4.77 (s, 1H), 4.56 (s, 2H), 3.78 (d, *J* = 5.1 Hz, 2H), 1.49 (s, 9H), 1.45 (s, 9H).

### 3. General experimental procedures synthesis of α-substituted cyanoacetates 2

The benzaldehyde are known compounds, which were prepared according to literature **2a-2p** (**2a** as the example)<sup>[3,4]</sup>.

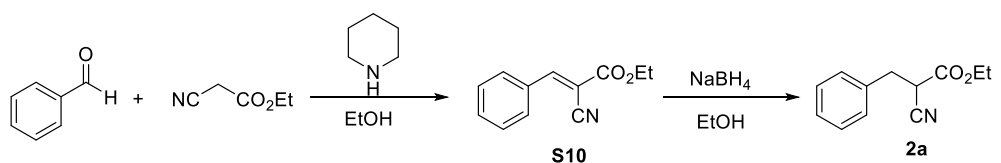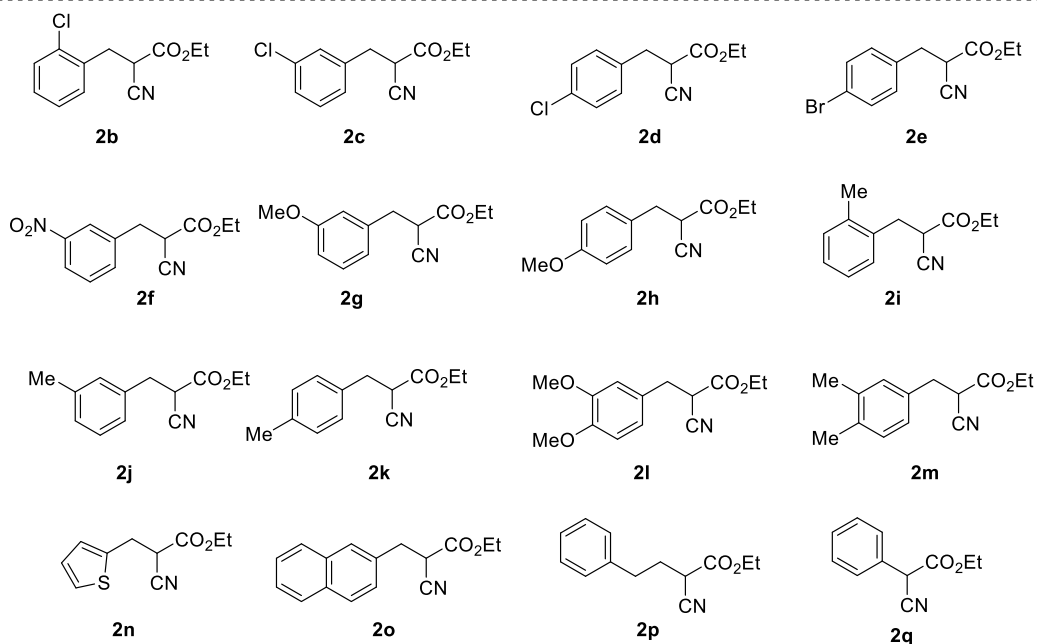

### Step 1:

To a stirring solution of benzaldehyde (2.0 mL, 20 mmol, 1.0 equiv), ethyl cyanoacetate (2.2 mL, 21 mmol, 1.05 equiv) in ethanol (10 mL), was added the piperidine (0.1 mL, 1 mmol, 0.05 equiv) dropwise at room temperature. The reaction mixture was stirred for 24 h at room temperature. Then, the mixture was filtered and the precipitate was washed with ethanol to afford pure product **S10** as white solid. The obtained crude product **S10** is proceeded directly to the next step without purification.

### Step 2:

To a stirring solution of **S10** (2.3 g, 11 mmol, 1.0 equiv) was dissolved in dry ethanol (15 mL), sodium borohydride (0.5 g, 13.2 mmol, 1.2 equiv) was slowly added dropwise for 10 min at 0 °C. After completion of the reaction, as indicated by TLC. The reaction was quenched with aq. NH<sub>4</sub>Cl and extracted with ethyl acetate. The organic layer was dried over anhydrous Na<sub>2</sub>SO<sub>4</sub>, filtered, and concentrated under vacuum. Then the residue was purified by column chromatography (PE/EA 10:1) to afford the compound **2a** as a colorless oil.

**2a:** <sup>1</sup>H NMR (400 MHz, CDCl<sub>3</sub>) δ 7.38 – 7.33 (m, 1H), 7.34 – 7.23 (m, 4H), 4.23 (q, *J* = 7.2 Hz, 2H), 3.72 (dd, *J* = 8.4, 5.8 Hz, 1H), 3.28 (dd, *J* = 13.8, 5.8 Hz, 1H), 3.19 (dd, *J* = 13.8, 8.4 Hz, 1H), 1.26 (t, *J* = 7.2 Hz, 3H).

**2b:** <sup>1</sup>H NMR (400 MHz, CDCl<sub>3</sub>) δ 7.43 – 7.38 (m, 1H), 7.36 – 7.32 (m, 1H), 7.28 – 7.25 (m, 2H), 4.27 (qd, *J* = 7.2, 1.5 Hz, 2H), 3.91 (dd, *J* = 9.5, 6.3 Hz, 1H), 3.52 (dd, *J* = 13.8, 6.3 Hz, 1H), 3.21 (dd, *J* = 13.8, 9.5 Hz, 1H), 1.30 (t, *J* = 7.1 Hz, 3H).

**2c:** <sup>1</sup>H NMR (400 MHz, CDCl<sub>3</sub>) δ 7.31 – 7.24 (m, 3H), 7.21 – 7.14 (m, 1H), 4.24 (qd, *J* = 7.1, 0.8 Hz, 2H), 3.73 (dd, *J* = 8.3, 5.9 Hz, 1H), 3.29 – 3.11 (m, 2H), 1.27 (t, *J* = 7.2 Hz, 3H).

**2d:** <sup>1</sup>H NMR (400 MHz, CDCl<sub>3</sub>) δ 7.33 – 7.28 (m, 2H), 7.24 – 7.19 (m, 2H), 4.23 (q, *J* = 7.1 Hz, 2H), 3.71 (dd, *J* = 8.2, 5.8 Hz, 1H), 3.20 (qd, *J* = 13.9, 7.0 Hz, 2H), 1.26 (t, *J* = 7.2 Hz, 3H).

**2e:** <sup>1</sup>H NMR (400 MHz, CDCl<sub>3</sub>) δ 7.49 – 7.44 (m, 2H), 7.18 – 7.13 (m, 2H), 4.23 (q, *J* = 7.2 Hz, 2H), 3.70 (dd, *J* = 8.2, 5.8 Hz, 1H), 3.19 (qd, *J* = 14.0, 7.0 Hz, 2H), 1.27 (t, *J* = 7.2 Hz, 3H).

**2f:** <sup>1</sup>H NMR (400 MHz, CDCl<sub>3</sub>) δ 8.21 – 8.13 (m, 2H), 7.66 (dt, *J* = 7.8, 1.4 Hz, 1H), 7.55 (t, *J* = 7.9 Hz, 1H), 4.27 (q, *J* = 7.1 Hz, 2H), 3.81 (dd, *J* = 8.0, 5.9 Hz, 1H), 3.43 – 3.29 (m, 2H), 1.29 (t, *J* = 7.1 Hz, 3H).

**2g:** <sup>1</sup>H NMR (400 MHz, CDCl<sub>3</sub>) δ 7.25 (t, *J* = 7.9 Hz, 1H), 6.87 – 6.80 (m, 3H), 4.28 – 4.19 (m, 2H), 3.80 (s, 3H), 3.72 (dd, *J* = 8.5, 5.8 Hz, 1H), 3.25 (dd, *J* = 13.8, 5.8 Hz, 1H), 3.15 (dd, *J* = 13.8, 8.4 Hz, 1H), 1.27 (t, *J* = 7.2 Hz, 3H).

**2h:** <sup>1</sup>H NMR (400 MHz, CDCl<sub>3</sub>) δ 7.21 – 7.14 (m, 2H), 6.93 – 6.80 (m, 2H), 4.23 (q, *J* = 7.2 Hz, 2H), 3.79 (s, 3H), 3.68 (dd, *J* = 8.2, 5.8 Hz, 1H), 3.21 (dd, *J* = 13.9, 5.8 Hz, 1H), 3.14 (dd, *J* = 13.9, 8.2 Hz, 1H), 1.27 (t, *J* = 7.2 Hz, 3H).

**2i:** <sup>1</sup>H NMR (400 MHz, CDCl<sub>3</sub>) δ 7.24 – 7.16 (m, 4H), 4.26 (qd, *J* = 7.2, 0.8 Hz, 2H), 3.68 (dd, *J* = 9.4, 6.0 Hz, 1H), 3.34 (dd, *J* = 14.1, 6.0 Hz, 1H), 3.19 (dd, *J* = 14.1, 9.4 Hz, 1H), 2.37 (s, 3H), 1.29 (t, *J* = 7.1 Hz, 3H).

**2j:** <sup>1</sup>H NMR (400 MHz, CDCl<sub>3</sub>) δ 7.23 (td, *J* = 7.4, 0.9 Hz, 1H), 7.13 – 7.04 (m, 3H), 4.24 (qd, *J* = 7.2, 0.7 Hz, 2H), 3.71 (dd, *J* = 8.5, 5.8 Hz, 1H), 3.24 (dd, *J* = 13.8, 5.8 Hz, 1H), 3.15 (dd, *J* = 13.8, 8.5 Hz, 1H), 2.34 (d, *J* = 0.9 Hz, 3H), 1.27 (t, *J* = 7.1 Hz, 3H).

**2k:** <sup>1</sup>H NMR (400 MHz, CDCl<sub>3</sub>) δ 7.15 (d, *J* = 1.1 Hz, 4H), 4.24 (q, *J* = 7.1 Hz, 2H), 3.69 (dd, *J* = 8.4, 5.8 Hz, 1H), 3.24 (dd, *J* = 13.8, 5.8 Hz, 1H), 3.15 (dd, *J* = 13.8, 8.4 Hz, 1H), 2.33 (s, 3H), 1.28 (t, *J* = 7.1 Hz, 3H).

**2l:** <sup>1</sup>H NMR (400 MHz, CDCl<sub>3</sub>) δ 6.81 (dd, *J* = 9.9, 1.3 Hz, 3H), 4.23 (q, *J* = 7.2 Hz, 2H), 3.87 (d, *J* = 5.0 Hz, 6H), 3.69 (dd, *J* = 8.3, 5.7 Hz, 1H), 3.30 – 3.02 (m, 2H), 1.28 (t, *J* = 7.1 Hz, 3H).

**2m:** <sup>1</sup>H NMR (400 MHz, CDCl<sub>3</sub>) δ 7.10 (d, *J* = 7.6 Hz, 1H), 7.05 – 6.98 (m, 2H), 4.25 (q, *J* = 7.1 Hz, 2H), 3.70 (dd, *J* = 8.5, 5.8 Hz, 1H), 3.25 – 3.08 (m, 2H), 2.25 (d, *J* = 4.1 Hz, 6H), 1.29 (t, *J* = 7.2 Hz, 3H).

**2n:** <sup>1</sup>H NMR (400 MHz, CDCl<sub>3</sub>) δ 7.23 (dd, *J* = 5.1, 1.3 Hz, 1H), 7.02 – 6.95 (m, 2H), 4.27 (q, *J* = 7.1 Hz, 2H), 3.76 (dd, *J* = 7.4, 6.0 Hz, 1H), 3.50 – 3.45 (m, 2H), 1.30 (t, *J* = 7.2 Hz, 3H).

**2o:** <sup>1</sup>H NMR (400 MHz, CDCl<sub>3</sub>) δ 7.87 – 7.77 (m, 3H), 7.74 (s, 1H), 7.52 – 7.44 (m, 2H), 7.38 (dd, *J* = 8.4, 1.8 Hz, 1H), 4.23 (q, *J* = 7.1 Hz, 2H), 3.81 (dd, *J* = 8.4, 5.9 Hz, 1H), 3.45 (dd, *J* = 13.9, 5.9 Hz, 1H), 3.36 (dd, *J* = 13.9, 8.4 Hz, 1H), 1.24 (t, *J* = 7.1 Hz, 3H).

**2p:** <sup>1</sup>H NMR (400 MHz, CDCl<sub>3</sub>) δ 7.37 – 7.28 (m, 2H), 7.27 – 7.18 (m, 3H), 4.24 (q, *J* = 7.1 Hz, 2H), 3.44 (dd, *J* = 8.0, 6.5 Hz, 1H), 2.95 – 2.76 (m, 2H), 2.31 – 2.23 (m, 2H), 1.31 (t, *J* = 7.1 Hz, 3H).

**2q:** <sup>1</sup>H NMR (400 MHz, CDCl<sub>3</sub>) δ 7.54 – 7.34 (m, 5H), 4.72 (s, 1H), 4.29 – 4.17 (m, 2H), 1.28 (t, *J* = 7.1 Hz, 3H).

## References:

- [1] Allen, B. D. W.; Connolly, M. J.; Harrity, J. P. A. *Chem.-Eur. J.* **2016**, *22*, 13000.
- [2] Yuan S P, Bao Q, Sun T J, et al. *Organic Letters*, 2022, 24(45): 8348-8353.
- [3] Reddy S N, Reddy V R, Dinda S, et al. *Organic Letters*, **2018**, 20(9): 2572-2575.
- [4] Zhang D, Lian M, Liu J, et al. *Organic Letters*, **2019**, 21(8): 2597-2601.

#### 4. General experimental procedures for asymmetric synthesis of compounds 3

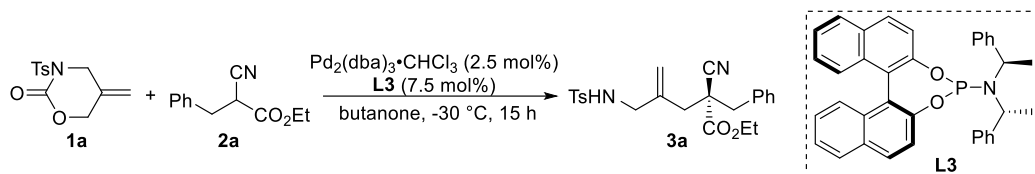

To a flame-dried reaction tube was added  $\text{Pd}_2(\text{dba})_3 \cdot \text{CHCl}_3$  (2.6 mg, 2.5 mol%), **L3** (4.5 mg, 7.5 mol%), **1a** (26.7 mg, 0.1 mmol) and **2a** (24.3 mg, 0.12 mmol) respectively. Then replaced argon three times quickly, and the reaction mixture was cooled to  $-30^\circ\text{C}$  followed by adding butanone (1.0 mL) for stirring 15 h. After completion of the reaction, as indicated by TLC, then the residue was purified by column chromatography (PE/EA 3:1) to afford the compound **3a** as a colorless oil

##### ethyl (*R*)-2-benzyl-2-cyano-4-(((4-methylphenyl)sulfonamido)methyl)pent-4-enoate (**3a**)

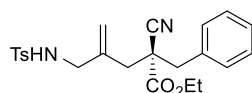

The product **3a** was purified by flash column chromatography (ethyl acetate /petroleum ether = 3:1); Colorless oil; 47.7 mg, 99% yield; 93% ee;  $[\alpha]_{\text{D}}^{20} = +12.7$  ( $c$  1.00,  $\text{CH}_2\text{Cl}_2$ );

The ee was determined by HPLC (Chiralpak IC,  $i$ PrOH/hexane = 30/70, flow rate 1.0 mL/min,  $\lambda = 220$  nm,  $t_{\text{major}} = 19.2$  min,  $t_{\text{minor}} = 21.7$  min);

$^1\text{H NMR}$  (400 MHz,  $\text{CDCl}_3$ )  $\delta$  7.74 (d,  $J = 7.9$  Hz, 2H), 7.36 – 7.28 (m, 5H), 7.25 (q,  $J = 4.6, 3.7$  Hz, 2H), 5.19 (s, 1H), 5.11 (s, 1H), 4.82 (t,  $J = 6.6$  Hz, 1H), 4.08 (q,  $J = 7.1$  Hz, 2H), 3.65 (dd,  $J = 15.3, 7.0$  Hz, 1H), 3.54 (dd,  $J = 15.4, 6.1$  Hz, 1H), 3.17 (d,  $J = 13.4$  Hz, 1H), 3.03 (d,  $J = 13.4$  Hz, 1H), 2.77 (d,  $J = 14.7$  Hz, 1H), 2.54 (d,  $J = 14.7$  Hz, 1H), 2.42 (s, 3H), 1.10 (t,  $J = 7.1$  Hz, 3H);

$^{13}\text{C NMR}$  (101 MHz,  $\text{CDCl}_3$ )  $\delta$  168.3, 143.7, 138.7, 136.8, 133.7, 130.0, 129.9, 128.7, 128.1, 127.3, 119.0, 118.3, 63.1, 50.8, 48.3, 44.0, 40.2, 21.7, 13.9;

HRMS (ESI-TOF) calcd. for  $\text{C}_{23}\text{H}_{27}\text{N}_2\text{O}_4\text{S}$   $[\text{M} + \text{H}]^+$  427.1686; found: 427.1696.

##### ethyl (*R*)-2-benzyl-4-(((4-bromophenyl)sulfonamido)methyl)-2-cyanopent-4-enoate (**3b**)

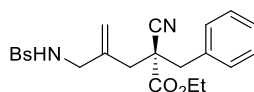

The product **3b** was purified by flash column chromatography (ethyl acetate /petroleum ether = 3:1); Colorless oil; 41.4 mg, 99% yield; 93% ee;  $[\alpha]_{\text{D}}^{20} = +14.2$  ( $c$  1.00,  $\text{CH}_2\text{Cl}_2$ );

The ee was determined by HPLC (Chiralpak IC,  $i$ PrOH/hexane = 20/80, flow rate 1.0 mL/min,  $\lambda = 220$  nm,  $t_{\text{major}} = 29.6$  min,  $t_{\text{minor}} = 32.5$  min);

$^1\text{H NMR}$  (400 MHz,  $\text{CDCl}_3$ )  $\delta$  7.79 (d,  $J = 7.7$  Hz, 2H), 7.54 – 7.48 (m, 1H), 7.48 – 7.40 (m, 2H), 7.24 (d,  $J = 5.6$  Hz, 3H), 7.17 (d,  $J = 7.8$  Hz, 2H), 5.12 (s, 1H), 5.03 (s, 1H), 4.88 (t,  $J = 6.5$  Hz, 1H), 4.00 (q,  $J = 7.0$  Hz, 2H), 3.60 (dd,  $J = 15.3, 6.0$  Hz, 1H), 3.50 (dd,  $J = 15.3, 4.8$  Hz, 1H), 3.09 (d,  $J = 13.4$  Hz, 1H), 2.96 (d,  $J = 13.4$  Hz, 1H), 2.68 (d,  $J = 14.7$  Hz, 1H), 2.46 (d,  $J = 14.7$  Hz, 1H), 1.03 (t,  $J = 7.1$  Hz, 3H);

$^{13}\text{C NMR}$  (101 MHz,  $\text{CDCl}_3$ )  $\delta$  168.3, 139.9, 138.7, 133.7, 132.9, 130.0, 129.3, 128.7, 128.1, 127.2, 119.0, 118.4, 63.1, 50.8, 48.2, 44.0, 40.2, 13.9;



HRMS (ESI-TOF) calcd. for C<sub>22</sub>H<sub>25</sub>N<sub>2</sub>O<sub>4</sub>S [M + H]<sup>+</sup> 413.1530; found: 413.1537.

**ethyl (R)-2-benzyl-2-cyano-4-(((4-nitrophenyl)sulfonamido)methyl)pent-4-enoate (3c)**

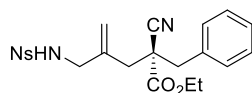

The product **3c** was purified by flash column chromatography (ethyl acetate /petroleum ether = 3:1); Colorless oil; 44.7 mg, 98% yield; 91% ee; [ $\alpha$ ]<sub>D</sub><sup>20</sup> = +4.0 (*c* 1.00, CH<sub>2</sub>Cl<sub>2</sub>);

The ee was determined by HPLC (Chiralpak IB EtOH/hexane = 10/90, flow rate 1.0 mL/min,  $\lambda$  = 220 nm, *t*<sub>minor</sub> = 21.5 min, *t*<sub>major</sub> = 22.9 min);

<sup>1</sup>H NMR (400 MHz, CDCl<sub>3</sub>)  $\delta$  8.27 (d, *J* = 8.3 Hz, 2H), 7.97 (d, *J* = 8.3 Hz, 2H), 7.25 (d, *J* = 5.1 Hz, 3H), 7.19 – 7.12 (m, 2H), 5.13 (s, 1H), 5.08 (t, *J* = 6.7 Hz, 1H), 5.05 (s, 1H), 4.03 (q, *J* = 7.2 Hz, 2H), 3.69 (dd, *J* = 15.7, 6.7 Hz, 1H), 3.58 (dd, *J* = 15.6, 5.7 Hz, 1H), 3.11 (d, *J* = 13.4 Hz, 1H), 2.98 (d, *J* = 13.3 Hz, 1H), 2.69 (d, *J* = 14.5 Hz, 1H), 2.44 (d, *J* = 14.5 Hz, 1H), 1.05 (t, *J* = 7.2 Hz, 3H);

<sup>13</sup>C NMR (101 MHz, CDCl<sub>3</sub>)  $\delta$  168.2, 150.2, 145.9, 138.3, 133.5, 130.0, 128.8, 128.5, 128.3, 124.6, 119.0, 118.9, 63.2, 50.8, 48.1, 44.0, 40.1, 14.0;

HRMS (ESI-TOF) calcd. for C<sub>22</sub>H<sub>24</sub>N<sub>3</sub>O<sub>6</sub>S [M + H]<sup>+</sup> 458.1380; found: 458.1381.

**ethyl (R)-4-(benzamidomethyl)-2-benzyl-2-cyanopent-4-enoate (3d)**

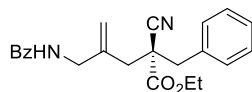

The product **3d** was purified by flash column chromatography (ethyl acetate /petroleum ether = 3:1); Colorless oil; 31.4 mg, 84% yield; 89% ee; [ $\alpha$ ]<sub>D</sub><sup>20</sup> = +12.3 (*c* 1.00, CH<sub>2</sub>Cl<sub>2</sub>);

The ee was determined by HPLC (Chiralpak IB EtOH/hexane = 7/93, flow rate 0.8 mL/min,  $\lambda$  = 254 nm, *t*<sub>minor</sub> = 15.6 min, *t*<sub>major</sub> = 16.7 min);

<sup>1</sup>H NMR (400 MHz, CDCl<sub>3</sub>)  $\delta$  7.72 (d, *J* = 7.6 Hz, 2H), 7.47 – 7.40 (m, 1H), 7.40 – 7.32 (m, 2H), 7.22 (d, *J* = 6.0 Hz, 5H), 6.52 (t, *J* = 6.0 Hz, 1H), 5.19 (s, 1H), 5.10 (s, 1H), 4.07 (dq, *J* = 14.3, 7.1, 6.6 Hz, 3H), 3.98 (dd, *J* = 15.9, 5.7 Hz, 1H), 3.15 (d, *J* = 13.4 Hz, 1H), 3.03 (d, *J* = 13.4 Hz, 1H), 2.82 (d, *J* = 14.6 Hz, 1H), 2.55 (d, *J* = 14.6 Hz, 1H), 1.05 (t, *J* = 7.2 Hz, 3H);

<sup>13</sup>C NMR (101 MHz, CDCl<sub>3</sub>)  $\delta$  168.4, 167.4, 139.8, 134.2, 133.7, 131.7, 130.1, 128.7, 128.6, 128.1, 127.1, 119.3, 117.1, 63.1, 51.0, 44.8, 44.1, 40.9, 13.9;

HRMS (ESI-TOF) calcd. for C<sub>23</sub>H<sub>25</sub>N<sub>2</sub>O<sub>3</sub> [M + H]<sup>+</sup> 377.1860; found: 377.1861.

**ethyl (R)-2-benzyl-4-(((tert-butoxycarbonyl)amino)methyl)-2-cyanopent-4-enoate (3e)**

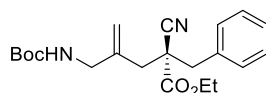

The product **3e** was purified by flash column chromatography (ethyl acetate /petroleum ether = 3:1); Colorless oil; 34.8 mg, 94% yield; 82% ee; [ $\alpha$ ]<sub>D</sub><sup>20</sup> = +15.7 (*c* 1.00, CH<sub>2</sub>Cl<sub>2</sub>);

The ee was determined by HPLC (Chiralpak IC, *i*PrOH/hexane = 20/80, flow rate 1.0 mL/min,  $\lambda$  = 220 nm, *t*<sub>major</sub> = 9.2 min, *t*<sub>minor</sub> = 10.0 min);

**<sup>1</sup>H NMR (400 MHz, CDCl<sub>3</sub>)** δ 7.28 – 7.19 (m, 5H), 5.12 (s, 1H), 5.04 (s, 1H), 4.72 (s, 1H), 4.05 (d, *J* = 6.8 Hz, 2H), 3.78 – 3.62 (m, 2H), 3.15 (d, *J* = 13.4 Hz, 1H), 3.02 (d, *J* = 13.4 Hz, 1H), 2.76 (d, *J* = 14.6 Hz, 1H), 2.51 (d, *J* = 14.6 Hz, 1H), 1.38 (s, 9H), 1.06 (t, *J* = 7.1 Hz, 3H);

**<sup>13</sup>C NMR (101 MHz, CDCl<sub>3</sub>)** δ 168.4, 155.9, 140.4, 133.9, 130.1, 128.7, 128.1, 119.1, 116.1, 79.7, 77.5, 77.2, 76.8, 63.0, 50.9, 45.5, 44.0, 40.8, 28.5, 14.0;

**HRMS (ESI-TOF)** calcd. for C<sub>21</sub>H<sub>29</sub>N<sub>2</sub>O<sub>4</sub> [M + H]<sup>+</sup> 373.2122; found: 373.2122.

**ethyl (*R*)-2-(2-chlorobenzyl)-2-cyano-4-(((4-methylphenyl)sulfonamido)methyl)pent-4-enoate**  
**(3f)**

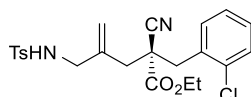

The product **3f** was purified by flash column chromatography (ethyl acetate /petroleum ether = 3:1); Colorless oil; 48.4 mg, 99% yield; 83% ee; [ $\alpha$ ]<sub>D</sub><sup>20</sup> = +19.5 (*c* 1.00, CH<sub>2</sub>Cl<sub>2</sub>);

**The ee was determined by HPLC** (Chiralpak IA, EtOH/hexane = 20/80, flow rate 1.0 mL/min,  $\lambda$  = 220 nm, *t*<sub>minor</sub> = 13.1 min, *t*<sub>major</sub> = 16.8 min);

**<sup>1</sup>H NMR (400 MHz, CDCl<sub>3</sub>)** δ 7.75 (d, *J* = 7.9 Hz, 2H), 7.30 (dd, *J* = 15.8, 7.3 Hz, 4H), 7.23 – 7.12 (m, 2H), 5.21 (s, 1H), 5.11 (s, 1H), 4.92 (t, *J* = 6.5 Hz, 1H), 4.11 (q, *J* = 7.2 Hz, 2H), 3.65 (dd, *J* = 15.3, 6.9 Hz, 1H), 3.55 (dd, *J* = 15.4, 6.1 Hz, 1H), 3.15 (d, *J* = 13.4 Hz, 1H), 3.00 (d, *J* = 13.5 Hz, 1H), 2.77 (d, *J* = 14.6 Hz, 1H), 2.57 (d, *J* = 14.6 Hz, 1H), 2.43 (s, 3H), 1.13 (t, *J* = 7.2 Hz, 3H);

**<sup>13</sup>C NMR (101 MHz, CDCl<sub>3</sub>)** δ 168.0, 143.7, 138.6, 136.8, 135.8, 134.4, 130.0 (2C), 129.9 (2C), 128.4, 128.3, 127.3 (2C), 118.6, 118.5, 63.2, 50.7, 48.2, 43.4, 40.3, 21.6, 14.0;

**HRMS (ESI-TOF)** calcd. for C<sub>23</sub>H<sub>26</sub>ClN<sub>2</sub>O<sub>4</sub>S [M + H]<sup>+</sup> 463.1296; found: 463.1304.

**ethyl (*R*)-2-(3-chlorobenzyl)-2-cyano-4-(((4-methylphenyl)sulfonamido)methyl)pent-4-enoate**  
**(3g)**

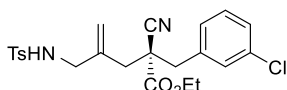

The product **3g** was purified by flash column chromatography (ethyl acetate /petroleum ether = 3:1); Colorless oil; 48.6 mg, 99% yield; 91% ee; [ $\alpha$ ]<sub>D</sub><sup>20</sup> = +11.3 (*c* 1.00, CH<sub>2</sub>Cl<sub>2</sub>);

**The ee was determined by HPLC** (Chiralpak IA, EtOH/hexane = 20/80, flow rate 1.0 mL/min,  $\lambda$  = 220 nm, *t*<sub>minor</sub> = 15.2 min, *t*<sub>major</sub> = 22.6 min);

**<sup>1</sup>H NMR (400 MHz, CDCl<sub>3</sub>)** δ 7.74 (d, *J* = 7.9 Hz, 2H), 7.44 – 7.34 (m, 2H), 7.30 (d, *J* = 7.9 Hz, 2H), 7.25 (q, *J* = 4.1 Hz, 2H), 5.21 (s, 1H), 5.11 (s, 1H), 4.90 (t, *J* = 6.5 Hz, 1H), 4.17 (q, *J* = 7.2 Hz, 2H), 3.65 (dd, *J* = 15.4, 7.0 Hz, 1H), 3.55 (dd, *J* = 15.4, 6.2 Hz, 1H), 3.38 (d, *J* = 14.0 Hz, 1H), 3.32 (d, *J* = 14.0 Hz, 1H), 2.84 (d, *J* = 14.7 Hz, 1H), 2.52 (d, *J* = 14.7 Hz, 1H), 2.42 (s, 3H), 1.18 (t, *J* = 7.2 Hz, 3H);

**<sup>13</sup>C NMR (101 MHz, CDCl<sub>3</sub>)** δ 168.1, 143.6, 138.7, 136.9, 135.0, 131.9, 131.7, 130.0, 129.8, 129.5, 127.2, 127.1, 118.6, 118.5, 63.4, 49.8, 48.2, 39.8, 39.7, 21.6, 13.9;

**HRMS (ESI-TOF)** calcd. for C<sub>23</sub>H<sub>26</sub>ClN<sub>2</sub>O<sub>4</sub>S [M + H]<sup>+</sup> 461.1296; found: 461.1305.

**ethyl (*R*)-2-(4-chlorobenzyl)-2-cyano-4-(((4-methylphenyl)sulfonamido)methyl)pent-4-enoate**  
**(3h)**

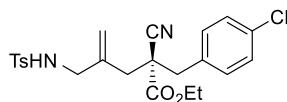

The product **3h** was purified by flash column chromatography (ethyl acetate /petroleum ether = 3:1); Colorless oil; 38.7 mg, 84% yield; 92% ee;  $[\alpha]_D^{20} = +17.2$  (*c* 1.00, CH<sub>2</sub>Cl<sub>2</sub>);

The ee was determined by HPLC (Chiralpak AS-H, EtOH/hexane = 20/80, flow rate 1.0 mL/min,  $\lambda = 220$  nm,  $t_{\text{minor}} = 17.8$  min,  $t_{\text{major}} = 26.2$  min);

<sup>1</sup>H NMR (400 MHz, CDCl<sub>3</sub>)  $\delta$  7.74 (d, *J* = 7.9 Hz, 2H), 7.34 – 7.27 (m, 4H), 7.19 (d, *J* = 8.0 Hz, 2H), 5.20 (s, 1H), 5.10 (s, 1H), 4.86 (t, *J* = 6.5 Hz, 1H), 4.14 – 4.04 (m, 2H), 3.65 (dd, *J* = 15.4, 6.9 Hz, 1H), 3.54 (dd, *J* = 15.3, 6.1 Hz, 1H), 3.15 (d, *J* = 13.5 Hz, 1H), 3.00 (d, *J* = 13.5 Hz, 1H), 2.76 (d, *J* = 14.6 Hz, 1H), 2.56 (d, *J* = 14.7 Hz, 1H), 2.43 (s, 3H), 1.13 (t, *J* = 7.1 Hz, 3H);

<sup>13</sup>C NMR (101 MHz, CDCl<sub>3</sub>)  $\delta$  168.1, 143.8, 138.6, 136.8, 134.2, 132.3, 131.4, 129.9, 128.9, 127.3, 118.8, 118.5, 63.2, 50.7, 48.2, 43.1, 40.2, 21.7, 14.0;

HRMS (ESI-TOF) calcd. for C<sub>23</sub>H<sub>26</sub>ClN<sub>2</sub>O<sub>4</sub>S [M + H]<sup>+</sup> 461.1296; found: 461.1301.

**ethyl (R)-2-(4-bromobenzyl)-2-cyano-4-(((4-methylphenyl)sulfonamido)methyl)pent-4-enoate (3i)**

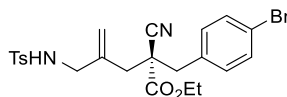

The product **3i** was purified by flash column chromatography (ethyl acetate /petroleum ether = 3:1); Colorless oil; 45.2 mg, 89% yield; 92% ee;  $[\alpha]_D^{20} = +30.4$  (*c* 1.00, CH<sub>2</sub>Cl<sub>2</sub>);

The ee was determined by HPLC (Chiralpak IA, EtOH/hexane = 20/80, flow rate 1.0 mL/min,  $\lambda = 220$  nm,  $t_{\text{minor}} = 15.7$  min,  $t_{\text{major}} = 21.5$  min);

<sup>1</sup>H NMR (400 MHz, CDCl<sub>3</sub>)  $\delta$  7.74 (d, *J* = 7.8 Hz, 2H), 7.45 (d, *J* = 7.9 Hz, 2H), 7.31 (d, *J* = 7.9 Hz, 2H), 7.13 (d, *J* = 8.0 Hz, 2H), 5.20 (s, 1H), 5.10 (s, 1H), 4.16 – 4.04 (m, 2H), 3.65 (dd, *J* = 15.4, 7.0 Hz, 1H), 3.54 (dd, *J* = 15.4, 6.2 Hz, 1H), 3.14 (d, *J* = 13.5 Hz, 1H), 2.99 (d, *J* = 13.5 Hz, 1H), 2.76 (d, *J* = 14.6 Hz, 1H), 2.56 (d, *J* = 14.7 Hz, 1H), 2.43 (s, 3H), 1.14 (t, *J* = 7.2 Hz, 3H);

<sup>13</sup>C NMR (101 MHz, CDCl<sub>3</sub>)  $\delta$  168.1, 143.7, 138.6, 136.7, 132.8, 131.9, 131.7, 129.9, 127.2, 122.4, 118.8, 118.5, 63.2, 50.6, 48.2, 43.2, 40.2, 21.7, 14.0;

HRMS (ESI-TOF) calcd. for C<sub>23</sub>H<sub>26</sub>BrN<sub>2</sub>O<sub>4</sub>S [M + H]<sup>+</sup> 505.0791; found: 505.0797.

**ethyl (R)-2-cyano-4-(((4-methylphenyl)sulfonamido)methyl)-2-(3-nitrobenzyl)pent-4-enoate (3j)**

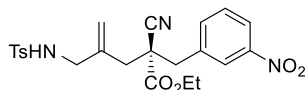

The product **3i** was purified by flash column chromatography (ethyl acetate /petroleum ether = 3:1); Colorless oil; 49.4 mg, 99% yield; 89% ee;  $[\alpha]_D^{20} = +30.4$  (*c* 1.00, CH<sub>2</sub>Cl<sub>2</sub>);

The ee was determined by HPLC (Chiralpak IA, EtOH/hexane = 40/60, flow rate 1.0 mL/min,  $\lambda = 220$  nm,  $t_{\text{minor}} = 16.3$  min,  $t_{\text{major}} = 21.1$  min);

<sup>1</sup>H NMR (400 MHz, CDCl<sub>3</sub>)  $\delta$  8.23 – 8.14 (m, 1H), 8.09 (s, 1H), 7.75 (d, *J* = 8.2 Hz, 2H), 7.66 (d, *J* = 7.6 Hz, 1H), 7.57 – 7.50 (m, 1H), 7.32 (d, *J* = 7.9 Hz, 2H), 5.23 (s, 1H), 5.20 – 5.07 (m, 2H), 4.20 – 4.08 (m, 2H), 3.67 (dd, *J* = 15.4, 6.8 Hz, 1H), 3.57 (dd, *J* = 15.4, 6.2 Hz, 1H), 3.33 (d, *J* =

13.7 Hz, 1H), 3.16 (d,  $J = 13.6$  Hz, 1H), 2.82 (d,  $J = 14.6$  Hz, 1H), 2.67 (d,  $J = 14.6$  Hz, 1H), 2.42 (s, 3H), 1.15 (t,  $J = 7.1$  Hz, 3H);

$^{13}\text{C NMR}$  (101 MHz,  $\text{CDCl}_3$ )  $\delta$  167.7, 148.3, 143.7, 138.4, 136.7, 136.3, 135.9, 129.8, 129.7, 127.2, 124.8, 123.2, 118.7, 118.3, 63.4, 50.7, 48.2, 42.8, 40.2, 21.6, 13.9;

**HRMS (ESI-TOF)** calcd. for  $\text{C}_{23}\text{H}_{26}\text{N}_3\text{O}_6\text{S}$   $[\text{M} + \text{H}]^+$  472.1537; found: 472.1544.

**ethyl (*R*)-2-cyano-2-(3-methoxybenzyl)-4-(((4-methylphenyl)sulfonamido)methyl)pent-4-enoate (3k)**

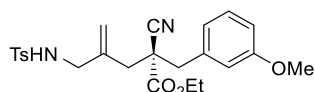

The product **3k** was purified by flash column chromatography (ethyl acetate /petroleum ether = 3:1); Colorless oil; 45.7 mg, 99% yield; 88% ee;  $[\alpha]_{\text{D}}^{20} = +12.3$  ( $c$  1.00,  $\text{CH}_2\text{Cl}_2$ );

**The ee was determined by HPLC** (Chiralpak IA, EtOH/hexane = 20/80, flow rate 1.0 mL/min,  $\lambda = 220$  nm,  $t_{\text{minor}} = 15.9$  min,  $t_{\text{major}} = 20.3$  min);

$^1\text{H NMR}$  (400 MHz,  $\text{CDCl}_3$ )  $\delta$  7.74 (d,  $J = 7.9$  Hz, 2H), 7.31 (d,  $J = 7.9$  Hz, 2H), 7.26 – 7.18 (m, 1H), 6.88 – 6.77 (m, 3H), 5.19 (s, 1H), 5.10 (s, 1H), 4.86 (t,  $J = 6.6$  Hz, 1H), 4.10 (q,  $J = 7.2$  Hz, 2H), 3.79 (s, 3H), 3.65 (dd,  $J = 15.4, 7.0$  Hz, 1H), 3.54 (dd,  $J = 15.4, 6.1$  Hz, 1H), 3.15 (d,  $J = 13.4$  Hz, 1H), 3.00 (d,  $J = 13.4$  Hz, 1H), 2.76 (d,  $J = 14.7$  Hz, 1H), 2.54 (d,  $J = 14.7$  Hz, 1H), 2.43 (s, 3H), 1.13 (t,  $J = 7.1$  Hz, 3H);

$^{13}\text{C NMR}$  (101 MHz,  $\text{CDCl}_3$ )  $\delta$  168.3, 159.7, 143.7, 138.8, 136.9, 135.1, 129.9, 129.7, 127.3, 122.3, 119.0, 118.4, 115.6, 113.7, 63.1, 55.3, 50.8, 48.3, 44.0, 40.2, 21.6, 14.0;

**HRMS (ESI-TOF)** calcd. for  $\text{C}_{24}\text{H}_{29}\text{N}_2\text{O}_5\text{S}$   $[\text{M} + \text{H}]^+$  457.1792; found: 457.1782.

**ethyl (*R*)-2-cyano-2-(4-methoxybenzyl)-4-(((4-methylphenyl)sulfonamido)methyl)pent-4-enoate (3l)**

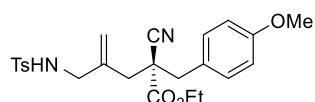

The product **3l** was purified by flash column chromatography (ethyl acetate /petroleum ether = 3:1); Colorless oil; 46.5 mg, 99% yield; 88% ee;  $[\alpha]_{\text{D}}^{20} = +13.9$  ( $c$  1.00,  $\text{CH}_2\text{Cl}_2$ );

**The ee was determined by HPLC** (Chiralpak IA, EtOH/hexane = 20/80, flow rate 1.0 mL/min,  $\lambda = 220$  nm,  $t_{\text{minor}} = 16.1$  min,  $t_{\text{major}} = 20.9$  min);

$^1\text{H NMR}$  (400 MHz,  $\text{CDCl}_3$ )  $\delta$  7.74 (d,  $J = 7.9$  Hz, 2H), 7.31 (d,  $J = 7.9$  Hz, 2H), 7.17 (d,  $J = 8.2$  Hz, 2H), 6.85 (d,  $J = 8.1$  Hz, 2H), 5.18 (s, 1H), 5.10 (s, 1H), 4.74 (t,  $J = 6.5$  Hz, 1H), 4.16 – 4.05 (m, 2H), 3.79 (s, 3H), 3.65 (dd,  $J = 15.4, 7.0$  Hz, 1H), 3.54 (dd,  $J = 15.3, 6.1$  Hz, 1H), 3.13 (d,  $J = 13.6$  Hz, 1H), 2.97 (d,  $J = 13.6$  Hz, 1H), 2.74 (d,  $J = 14.7$  Hz, 1H), 2.52 (d,  $J = 14.7$  Hz, 1H), 2.43 (s, 3H), 1.14 (t,  $J = 7.1$  Hz, 3H);

$^{13}\text{C NMR}$  (101 MHz,  $\text{CDCl}_3$ )  $\delta$  168.4, 159.5, 143.7, 138.8, 136.9, 131.2, 129.9, 127.3, 125.7, 119.1, 118.3, 114.1, 63.0, 55.4, 51.1, 48.3, 43.3, 40.1, 21.7, 14.0;

**HRMS (ESI-TOF)** calcd. for  $\text{C}_{24}\text{H}_{29}\text{N}_2\text{O}_5\text{S}$   $[\text{M} + \text{H}]^+$  457.1792; found: 457.1797.

**ethyl (*R*)-2-cyano-2-(2-methylbenzyl)-4-(((4-methylphenyl)sulfonamido)methyl)pent-4-enoate (3m)**

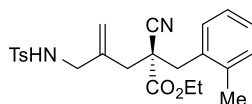

The product **3m** was purified by flash column chromatography (ethyl acetate /petroleum ether = 3:1);

Colorless oil; 42.2 mg, 96% yield; 92% ee;  $[\alpha]_{\text{D}}^{20} = +139$  (*c* 1.00, CH<sub>2</sub>Cl<sub>2</sub>);

The ee was determined by HPLC (Chiralpak IC, *i*PrOH/hexane = 20/80, flow rate 1.0 mL/min,  $\lambda = 220$  nm,  $t_{\text{major}} = 32.9$  min,  $t_{\text{minor}} = 36.4$  min);

<sup>1</sup>H NMR (400 MHz, CDCl<sub>3</sub>)  $\delta$  7.74 (d, *J* = 7.9 Hz, 2H), 7.30 (d, *J* = 7.9 Hz, 2H), 7.23 – 7.11 (m, 4H), 5.20 (s, 1H), 5.11 (s, 1H), 4.85 (t, *J* = 6.5 Hz, 1H), 4.11 (q, *J* = 7.2 Hz, 2H), 3.66 (dd, *J* = 15.3, 7.0 Hz, 1H), 3.54 (dd, *J* = 15.3, 6.1 Hz, 1H), 3.22 (d, *J* = 14.0 Hz, 1H), 3.16 (d, *J* = 14.0 Hz, 1H), 2.82 (d, *J* = 14.6 Hz, 1H), 2.58 (d, *J* = 14.6 Hz, 1H), 2.42 (s, 3H), 2.37 (s, 3H), 1.13 (t, *J* = 7.1 Hz, 3H);

<sup>13</sup>C NMR (101 MHz, CDCl<sub>3</sub>)  $\delta$  168.7, 143.7, 138.8, 137.3, 136.9, 132.3, 131.1, 130.2, 129.9, 128.1, 127.3, 126.2, 119.2, 118.4, 63.1, 50.1, 48.3, 40.4, 40.1, 21.6, 20.0, 13.9;

HRMS (ESI-TOF) calcd. for C<sub>24</sub>H<sub>29</sub>N<sub>2</sub>O<sub>4</sub>S [M + H]<sup>+</sup> 441.1843; found: 441.1847.

**ethyl (*R*)-2-cyano-2-(3-methylbenzyl)-4-(((4-methylphenyl)sulfonamido)methyl)pent-4-enoate (**3n**)**

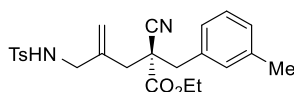

The product **3n** was purified by flash column chromatography (ethyl acetate /petroleum ether = 3:1); Colorless oil; 42.9 mg, 97% yield; 91% ee;  $[\alpha]_{\text{D}}^{20} = +11.4$  (*c* 1.00, CH<sub>2</sub>Cl<sub>2</sub>);

The ee was determined by HPLC (Chiralpak IC, *i*PrOH/hexane = 20/80, flow rate 1.0 mL/min,  $\lambda = 220$  nm,  $t_{\text{major}} = 34.1$  min,  $t_{\text{minor}} = 40.0$  min);

<sup>1</sup>H NMR (400 MHz, CDCl<sub>3</sub>)  $\delta$  7.74 (d, *J* = 7.9 Hz, 2H), 7.31 (d, *J* = 7.9 Hz, 2H), 7.23 – 7.17 (m, 1H), 7.11 (d, *J* = 7.7 Hz, 1H), 7.04 (d, *J* = 6.5 Hz, 2H), 5.19 (s, 1H), 5.10 (s, 1H), 4.86 (t, *J* = 6.6 Hz, 1H), 4.09 (q, *J* = 7.2 Hz, 2H), 3.64 (dd, *J* = 15.3, 7.0 Hz, 1H), 3.54 (dd, *J* = 15.4, 6.1 Hz, 1H), 3.13 (d, *J* = 13.4 Hz, 1H), 2.99 (d, *J* = 13.4 Hz, 1H), 2.76 (d, *J* = 14.7 Hz, 1H), 2.53 (d, *J* = 14.7 Hz, 1H), 2.42 (s, 3H), 2.33 (s, 3H), 1.15 – 1.08 (m, 3H);

<sup>13</sup>C NMR (101 MHz, CDCl<sub>3</sub>)  $\delta$  168.3, 143.7, 138.8, 138.3, 136.9, 133.6, 130.7, 129.9, 128.8, 128.6, 127.3, 127.0, 119.0, 118.3, 63.0, 50.8, 48.3, 44.0, 40.2, 21.6, 21.4, 13.9;

HRMS (ESI-TOF) calcd. for C<sub>24</sub>H<sub>29</sub>N<sub>2</sub>O<sub>4</sub>S [M + H]<sup>+</sup> 441.1843; found: 441.1850.

**ethyl (*R*)-2-cyano-2-(4-methylbenzyl)-4-(((4-methylphenyl)sulfonamido)methyl)pent-4-enoate (**3o**)**

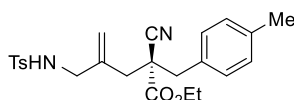

The product **3o** was purified by flash column chromatography (ethyl acetate /petroleum ether = 3:1); Colorless oil; 40.4 mg, 92% yield; 91 % ee;  $[\alpha]_{\text{D}}^{20} = +2.0$  (*c* 1.00, CH<sub>2</sub>Cl<sub>2</sub>);

The ee was determined by HPLC (Chiralpak IA, EtOH/hexane = 15/85, flow rate 1.0 mL/min,  $\lambda = 254$  nm,  $t_{\text{minor}} = 16.7$  min,  $t_{\text{major}} = 20.0$  min);

**<sup>1</sup>H NMR (400 MHz, CDCl<sub>3</sub>)** δ 7.74 (d, *J* = 7.8 Hz, 2H), 7.30 (d, *J* = 7.9 Hz, 2H), 7.12 (s, 4H), 5.18 (s, 1H), 5.09 (s, 1H), 4.89 (t, *J* = 6.6 Hz, 1H), 4.14 – 4.04 (m, 2H), 3.63 (dd, *J* = 15.4, 7.0 Hz, 1H), 3.53 (dd, *J* = 15.4, 6.1 Hz, 1H), 3.13 (d, *J* = 13.4 Hz, 1H), 2.98 (d, *J* = 13.5 Hz, 1H), 2.74 (d, *J* = 14.7 Hz, 1H), 2.52 (d, *J* = 14.7 Hz, 1H), 2.42 (s, 3H), 2.32 (s, 3H), 1.12 (t, *J* = 7.2 Hz, 3H);

**<sup>13</sup>C NMR (101 MHz, CDCl<sub>3</sub>)** δ 168.4, 143.7, 138.8, 137.8, 136.9, 130.6, 129.9, 129.8, 129.4, 127.3, 119.0, 118.2, 63.0, 50.9, 48.2, 43.6, 40.1, 21.6, 21.2, 13.9;

**HRMS (ESI-TOF)** calcd. for C<sub>24</sub>H<sub>29</sub>N<sub>2</sub>O<sub>4</sub>S [M + H]<sup>+</sup> 441.1843; found: 441.1851.

**ethyl (*R*)-2-cyano-2-(3,4-dimethoxybenzyl)-4-(((4-methylphenyl)sulfonamido)methyl)pent-4-enoate (3p)**

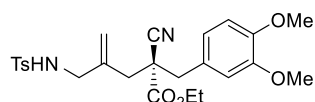

The product **3p** was purified by flash column chromatography (ethyl acetate /petroleum ether = 3:1); Colorless oil; 43.4 mg, 89% yield; 89% ee; [ $\alpha$ ]<sub>D</sub><sup>20</sup> = +2.0 (*c* 1.00, CH<sub>2</sub>Cl<sub>2</sub>);

**The ee was determined by HPLC** (Chiralpak IA, EtOH/hexane = 30/70, flow rate 1.0 mL/min,  $\lambda$  = 254 nm, *t*<sub>minor</sub> = 11.6 min, *t*<sub>major</sub> = 13.7 min);

**<sup>1</sup>H NMR (400 MHz, CDCl<sub>3</sub>)** δ 7.74 (d, *J* = 8.3 Hz, 2H), 7.30 (d, *J* = 8.0 Hz, 2H), 6.85 – 6.76 (m, 3H), 5.19 (s, 1H), 5.10 (s, 1H), 5.02 – 4.90 (m, 1H), 4.18 – 4.03 (m, 2H), 3.86 (d, *J* = 2.3 Hz, 6H), 3.64 (dd, *J* = 15.3, 6.8 Hz, 1H), 3.54 (dd, *J* = 15.3, 6.1 Hz, 1H), 3.14 (d, *J* = 13.6 Hz, 1H), 2.99 (d, *J* = 13.6 Hz, 1H), 2.76 (d, *J* = 14.7 Hz, 1H), 2.55 (d, *J* = 14.7 Hz, 1H), 2.42 (s, 3H), 1.14 (t, *J* = 7.1 Hz, 3H);

**<sup>13</sup>C NMR (101 MHz, CDCl<sub>3</sub>)** δ 168.4, 148.8, 148.8, 143.6, 138.8, 136.9, 129.8, 127.2, 126.2, 122.3, 119.2, 118.1, 113.1, 111.1, 63.0, 55.9, 55.8, 51.0, 48.2, 43.7, 40.1, 21.6, 14.0;

**HRMS (ESI-TOF)** calcd. for C<sub>25</sub>H<sub>31</sub>N<sub>2</sub>O<sub>6</sub>S [M + H]<sup>+</sup> 487.1897; found: 487.1902.

**ethyl (*R*)-2-cyano-2-(3,4-dimethylbenzyl)-4-(((4-methylphenyl)sulfonamido)methyl)pent-4-enoate (3q)**

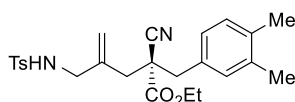

The product **3q** was purified by flash column chromatography (ethyl acetate /petroleum ether = 3:1); Colorless oil; 45.5 mg, 99% yield; 91% ee; [ $\alpha$ ]<sub>D</sub><sup>20</sup> = +15.1 (*c* 1.00, CH<sub>2</sub>Cl<sub>2</sub>);

**The ee was determined by HPLC** (Chiralpak AS-H, EtOH/hexane = 20/80, flow rate 1.0 mL/min,  $\lambda$  = 220 nm, *t*<sub>minor</sub> = 13.3 min, *t*<sub>major</sub> = 15.4 min);

**<sup>1</sup>H NMR (400 MHz, CDCl<sub>3</sub>)** δ 7.74 (d, *J* = 7.9 Hz, 2H), 7.31 (d, *J* = 7.9 Hz, 2H), 7.07 (d, *J* = 7.6 Hz, 1H), 7.01 – 6.94 (m, 2H), 5.18 (s, 1H), 5.10 (s, 1H), 4.82 (t, *J* = 6.5 Hz, 1H), 4.10 (q, *J* = 7.1 Hz, 2H), 3.64 (dd, *J* = 15.4, 6.9 Hz, 1H), 3.54 (dd, *J* = 15.3, 6.1 Hz, 1H), 3.12 (d, *J* = 13.4 Hz, 1H), 2.95 (d, *J* = 13.4 Hz, 1H), 2.74 (d, *J* = 14.7 Hz, 1H), 2.51 (d, *J* = 14.7 Hz, 1H), 2.42 (s, 3H), 2.23 (s, 6H), 1.14 (t, *J* = 7.2 Hz, 3H);

**<sup>13</sup>C NMR (101 MHz, CDCl<sub>3</sub>)** δ 168.5, 143.7, 138.8, 136.9, 136.8, 136.5, 131.2, 131.0, 129.9, 129.8, 127.4, 127.3, 119.0, 118.2, 63.0, 50.9, 48.2, 43.6, 40.1, 21.6, 19.8, 19.5, 14.0;

**HRMS (ESI-TOF)** calcd. for C<sub>25</sub>H<sub>31</sub>N<sub>2</sub>O<sub>4</sub>S [M + H]<sup>+</sup> 455.1999; found: 455.2006.

**ethyl (*R*)-2-cyano-4-(((4-methylphenyl)sulfonamido)methyl)-2-(thiophen-2-ylmethyl)pent-4-enoate (**3r**)**

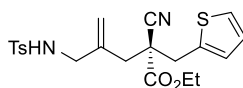

The product **3r** was purified by flash column chromatography (ethyl acetate /petroleum ether = 3:1); Colorless oil; 34.5 mg, 80% yield; 89% ee;  $[\alpha]_D^{20} = +8.7$  (*c* 1.00, CH<sub>2</sub>Cl<sub>2</sub>);

**The ee was determined by HPLC** (Chiralpak IA, EtOH/hexane = 20/80, flow rate 1.0 mL/min,  $\lambda = 220$  nm,  $t_{\text{minor}} = 15.2$  min,  $t_{\text{major}} = 25.5$  min);

**<sup>1</sup>H NMR (400 MHz, CDCl<sub>3</sub>)**  $\delta$  7.74 (d, *J* = 7.9 Hz, 2H), 7.32 (d, *J* = 7.9 Hz, 2H), 7.23 (d, *J* = 5.1 Hz, 1H), 7.04 – 6.94 (m, 2H), 5.21 (s, 1H), 5.12 (s, 1H), 4.74 (t, *J* = 6.5 Hz, 1H), 4.16 (q, *J* = 7.2 Hz, 2H), 3.66 (dd, *J* = 15.4, 7.0 Hz, 1H), 3.56 (dd, *J* = 15.4, 6.2 Hz, 1H), 3.43 (d, *J* = 14.5 Hz, 1H), 3.27 (d, *J* = 14.5 Hz, 1H), 2.74 (d, *J* = 14.5 Hz, 1H), 2.59 (d, *J* = 14.6 Hz, 1H), 2.43 (s, 3H), 1.20 (t, *J* = 7.2 Hz, 3H);

**<sup>13</sup>C NMR (101 MHz, CDCl<sub>3</sub>)**  $\delta$  168.1, 143.8, 138.7, 136.9, 134.9, 129.9, 128.5, 127.3 (2C), 125.9, 118.9, 118.7, 63.3, 51.2, 48.2, 40.0, 38.1, 21.7, 14.0;

**HRMS (ESI-TOF)** calcd. for C<sub>21</sub>H<sub>25</sub>N<sub>2</sub>O<sub>4</sub>S<sub>2</sub> [M + H]<sup>+</sup> 433.1250; found: 433.1257.

**ethyl (*R*)-2-cyano-4-(((4-methylphenyl)sulfonamido)methyl)-2-(naphthalen-2-ylmethyl)pent-4-enoate (**3s**)**

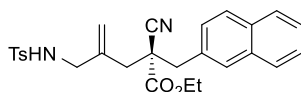

The product **3s** was purified by flash column chromatography (ethyl acetate /petroleum ether = 3:1); Colorless oil; 53.3 mg, 99% yield; 89% ee;  $[\alpha]_D^{20} = +11.7$  (*c* 1.00, CH<sub>2</sub>Cl<sub>2</sub>);

**The ee was determined by HPLC** (Chiralpak IC, <sup>i</sup>PrOH/hexane = 30/70, flow rate 1.0 mL/min,  $\lambda = 220$  nm,  $t_{\text{major}} = 22.5$  min,  $t_{\text{minor}} = 25.1$  min);

**<sup>1</sup>H NMR (400 MHz, CDCl<sub>3</sub>)**  $\delta$  7.84 – 7.77 (m, 3H), 7.76 – 7.68 (m, 3H), 7.47 (dd, *J* = 6.3, 3.2 Hz, 2H), 7.37 (d, *J* = 8.4 Hz, 1H), 7.27 (d, *J* = 11.8 Hz, 2H), 5.20 (s, 1H), 5.12 (s, 1H), 4.93 (t, *J* = 6.5 Hz, 1H), 4.12 – 3.99 (m, 2H), 3.65 (dd, *J* = 15.4, 6.9 Hz, 1H), 3.55 (dd, *J* = 15.4, 6.1 Hz, 1H), 3.34 (d, *J* = 13.4 Hz, 1H), 3.19 (d, *J* = 13.4 Hz, 1H), 2.81 (d, *J* = 14.7 Hz, 1H), 2.58 (d, *J* = 14.7 Hz, 1H), 2.40 (s, 3H), 1.04 (t, *J* = 7.1 Hz, 3H);

**<sup>13</sup>C NMR (101 MHz, CDCl<sub>3</sub>)**  $\delta$  168.3, 143.7, 138.7, 136.8, 133.3, 132.9, 131.3, 129.8, 129.2, 128.4, 127.9, 127.7, 127.7, 127.2, 126.4, 126.3, 119.0, 118.3, 63.1, 50.9, 48.2, 44.0, 40.3, 21.6, 13.9;

**HRMS (ESI-TOF)** calcd. for C<sub>27</sub>H<sub>29</sub>N<sub>2</sub>O<sub>4</sub>S [M + H]<sup>+</sup> 477.1843; found: 477.1852.

**ethyl (*R*)-2-cyano-4-(((4-methylphenyl)sulfonamido)methyl)-2-phenethylpent-4-enoate (**3t**)**

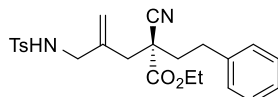

The product **3t** was purified by flash column chromatography (ethyl acetate /petroleum ether = 3:1); Colorless oil; 43.0 mg, 98% yield; 81% ee;  $[\alpha]_D^{20} = +1.6$  (*c* 1.00, CH<sub>2</sub>Cl<sub>2</sub>);

**The ee was determined by HPLC** (Chiralpak IA, EtOH/hexane = 20/80, flow rate 1.0 mL/min,  $\lambda = 220$  nm,  $t_{\text{minor}} = 11.9$  min,  $t_{\text{major}} = 20.8$  min);

**<sup>1</sup>H NMR (400 MHz, CDCl<sub>3</sub>)** δ 7.79 – 7.72 (m, 2H), 7.33 – 7.27 (m, 4H), 7.23 (d, *J* = 7.2 Hz, 1H), 7.17 (d, *J* = 7.5 Hz, 2H), 5.19 (s, 1H), 5.09 (s, 1H), 4.86 (t, *J* = 6.5 Hz, 1H), 4.18 (q, *J* = 7.2 Hz, 2H), 3.65 (dd, *J* = 15.4, 6.9 Hz, 1H), 3.55 (dd, *J* = 15.4, 6.2 Hz, 1H), 2.88 (td, *J* = 12.8, 4.7 Hz, 1H), 2.69 – 2.51 (m, 3H), 2.40 (s, 3H), 2.21 (td, *J* = 12.7, 5.2 Hz, 1H), 2.03 (td, *J* = 12.8, 4.7 Hz, 1H), 1.29 (t, *J* = 7.1 Hz, 3H);

**<sup>13</sup>C NMR (101 MHz, CDCl<sub>3</sub>)** δ 168.5, 143.7, 139.5, 138.8, 136.8, 129.9, 128.7, 128.5, 127.2, 126.7, 119.1, 118.3, 63.2, 49.1, 48.2, 40.3, 39.9, 31.7, 21.6, 14.1;

**HRMS (ESI-TOF)** calcd. for C<sub>24</sub>H<sub>29</sub>N<sub>2</sub>O<sub>4</sub>S [M + H]<sup>+</sup> 441.1843; found: 441.1850.

### ethyl (*R*)-2-cyano-4-(((4-methylphenyl)sulfonamido)methyl)-2-phenylpent-4-enoate (**3u**)

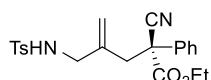

The product **3u** was purified by flash column chromatography (ethyl acetate /petroleum ether = 3:1); Colorless oil; 31.1 mg, 75% yield; 23% ee; [*α*]<sub>D</sub><sup>20</sup> = -8.1 (*c* 1.00, CH<sub>2</sub>Cl<sub>2</sub>);

**The ee was determined by HPLC** (Chiralpak IC EtOH/hexane = 10/90, flow rate 1.0 mL/min, λ = 220 nm, *t*<sub>major</sub> = 26.8 min, *t*<sub>minor</sub> = 29.3 min);

**<sup>1</sup>H NMR (400 MHz, CDCl<sub>3</sub>)** δ 7.73 – 7.65 (m, 2H), 7.50 (dd, *J* = 7.8, 1.9 Hz, 2H), 7.44 – 7.34 (m, 3H), 7.28 (d, *J* = 8.0 Hz, 2H), 5.18 (s, 1H), 5.09 (s, 1H), 4.76 – 4.68 (m, 1H), 4.29 – 4.14 (m, 2H), 3.47 – 3.30 (m, 2H), 3.10 (d, *J* = 14.8 Hz, 1H), 2.77 (d, *J* = 14.8 Hz, 1H), 2.42 (s, 3H), 1.22 (t, *J* = 7.1 Hz, 3H);

**<sup>13</sup>C NMR (101 MHz, CDCl<sub>3</sub>)** δ 167.4, 143.6, 138.5, 136.9, 134.2, 129.8, 129.4, 129.2, 127.3, 126.1, 119.1, 118.3, 63.7, 53.7, 48.6, 40.9, 21.6, 13.9;

**HRMS (ESI-TOF)** calcd. for C<sub>22</sub>H<sub>25</sub>N<sub>2</sub>O<sub>4</sub>S [M + H]<sup>+</sup> 413.1530; found: 413.1537.

## 5. Scale-up experiment

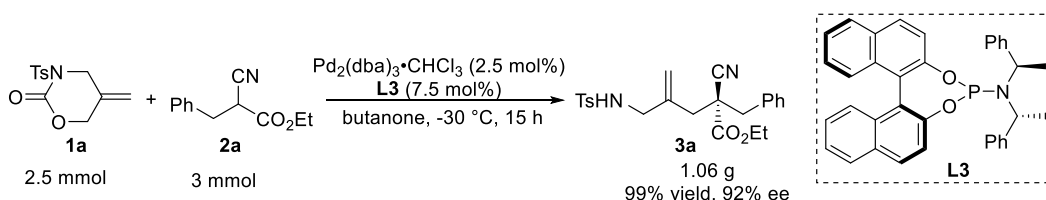

In a flame-dried round bottom flask equipped with a magnetic stirring bar, the solution of 5-methylene-3-tosyl-1,3-oxazinan-2-one **1a** (667mg, 2.5 mmol, 1.0 equiv), ethyl 2-cyano-3-phenylpropanoate **2a** (607 mg, 3 mmol, 1.2 equiv) in butanone (30.0 mL) was stirred at -30 °C. And then, the mixture was stirred at the same temperature for the specified time (about 15 h). After completion of the reaction, as indicated by TLC, the solvent was concentrated under reduced pressure and the residue was purified by flash chromatography on silica gel with PE/EA = 3:1 to give the desired product **3a** (1.06 g, 99% yield, 92% ee).

## 6. The procedure for the synthesis of compound 5.

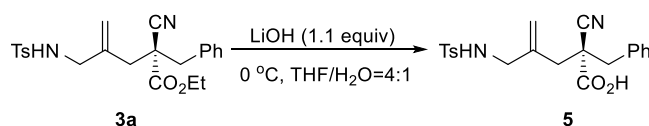



In an ordinary vial equipped with a magnetic stirring bar, **3a** (42.6 mg, 0.1 mmol, 1.0 equiv) was dissolved in THF/H<sub>2</sub>O (2 mL/0.5 mL) and the mixture was cooled to 0 °C. LiOH·H<sub>2</sub>O (8.1 mg, 0.39 mmol, 1.1 equiv) was added and the mixture was stirred at 0 °C for 30 min. After the reaction was completed, the reaction mixture was added 1M HCl until pH = 2 and then extracted with EA (10 mL × 2). The combined organic extracts were washed with brine, dried over anhydrous Na<sub>2</sub>SO<sub>4</sub>, and removed under reduced pressure. Then the crude product was purified by flash column chromatography (DCM/MeOH = 20:1) to afford the desired products **5** as a colorless oil (77% yield, 96% ee).

**(R)-2-benzyl-2-cyano-4-(((4-methylphenyl)sulfonamido)methyl)pent-4-enoic acid (**5**)**

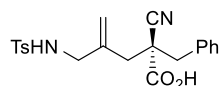

The product **5** was purified by flash column chromatography (DCM/MeOH = 20:1);

Colourless oil; 30.7 mg, 77% yield; 96% ee;  $[\alpha]_D^{20} = -10.1$  (*c* 1.00, CH<sub>2</sub>Cl<sub>2</sub>);

**The ee was determined by HPLC** (Chiralpak AD-H, *i*PrOH/hexane = 15/85, flow rate 1.0 mL/min,  $\lambda = 220$  nm,  $t_{\text{major}} = 23.4$  min,  $t_{\text{minor}} = 33.7$  min);

**<sup>1</sup>H NMR (400 MHz, D<sub>2</sub>O)**  $\delta$  7.73 – 7.61 (m, 2H), 7.42 – 7.28 (m, 5H), 7.25 – 7.15 (m, 2H), 5.11 (s, 1H), 5.02 (s, 1H), 3.63 – 3.44 (m, 2H), 3.03 (d, *J* = 13.4 Hz, 1H), 2.74 (d, *J* = 13.5 Hz, 1H), 2.49 (d, *J* = 14.9 Hz, 1H), 2.32 (s, 3H), 2.13 (d, *J* = 14.9 Hz, 1H);

**<sup>13</sup>C NMR (101 MHz, D<sub>2</sub>O)**  $\delta$  171.0, 142.5, 137.2, 133.3, 133.2, 127.8, 127.7, 126.2, 125.3, 124.6, 120.1, 114.4, 51.8, 45.6, 40.7, 37.0, 18.5;

**HRMS (ESI-TOF)** calcd. for C<sub>21</sub>H<sub>23</sub>N<sub>2</sub>O<sub>4</sub>S [M + H]<sup>+</sup> 399.1373; found: 399.1379.

**7. The procedure for the synthesis of compound 6.**

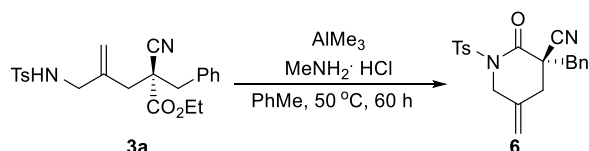

A freshly prepared stock solution of trimethylaluminum amine complex was prepared by adding trimethylaluminum (0.5 mL, 2M in toluene) to methyl amine hydrochloride (67.5 mg, 1 mmol) in toluene (4.5 mL) at 0 °C and allowed to warm to ambient temperature. After the methane evolution ceased (about 1 hour), the aluminum amine complex solution (0.9 mL, 0.18 mmol, 3.0 equiv) was then added to ester **3a** (25.6 mg, 0.06 mmol, 1.0 equiv) in toluene (2 mL) at room temperature and immediately heated to 50 °C. The reaction was maintained at 50 °C for three days. After completion of the reaction (confirmed by TLC analysis). The reaction was quenched with aq. NH<sub>4</sub>Cl and extracted with CH<sub>2</sub>Cl<sub>2</sub>. The organic layer was dried over Na<sub>2</sub>SO<sub>4</sub>, filtered, and concentrated under vacuum. The residue was chromatographed on silica gel with (PE/EA 2:1) to afford compound **6** as a white solid (77% yield, 90% ee).

**(R)-3-benzyl-5-methylene-2-oxo-1-tosylpiperidine-3-carbonitrile (**6**)**

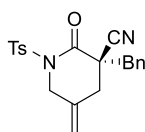

The product **6** was purified by flash column chromatography (ethyl acetate /petroleum ether = 4:1); White solid; 17.6 mg, 77% yield; 90% ee;  $[\alpha]_D^{20} = +9.2$  ( $c$  1.00,  $\text{CH}_2\text{Cl}_2$ ); m.p. 127.6-128.4 °C

The ee was determined by HPLC (Chiralpak IC, EtOH/hexane = 10/90, flow rate 1.0 mL/min,  $\lambda = 220$  nm,  $t_{\text{minor}} = 21.8$  min,  $t_{\text{major}} = 23.2$  min);

$^1\text{H NMR}$  (400 MHz,  $\text{CDCl}_3$ )  $\delta$  7.90 – 7.82 (m, 2H), 7.30 (d,  $J = 8.3$  Hz, 2H), 7.22 (dd,  $J = 5.0, 2.0$  Hz, 3H), 7.12 – 7.06 (m, 2H), 5.26 (s, 1H), 5.10 (s, 1H), 4.58 (dt,  $J = 14.6, 1.5$  Hz, 1H), 4.40 (dt,  $J = 14.6, 1.6$  Hz, 1H), 3.21 (d,  $J = 13.9$  Hz, 1H), 3.02 (d,  $J = 13.9$  Hz, 1H), 2.57 (d,  $J = 14.4$  Hz, 1H), 2.48 (d,  $J = 14.4$  Hz, 1H), 2.40 (s, 3H);

$^{13}\text{C NMR}$  (101 MHz,  $\text{CDCl}_3$ )  $\delta$  164.9, 145.9, 134.7, 133.3, 132.5, 130.5, 129.8, 129.1, 128.9, 128.2, 117.9, 117.4, 47.9, 41.0, 37.1, 29.8, 21.9;

HRMS (ESI-TOF) calcd. for  $\text{C}_{21}\text{H}_{21}\text{N}_2\text{O}_3\text{S}$   $[\text{M} + \text{H}]^+$  381.1267; found: 381.1273.

## 8. X-ray crystal structure of compounds **6**

Single crystals of  $\text{C}_{21}\text{H}_{20}\text{N}_2\text{O}_3\text{S}$  **6** was prepared from the mixture solvent of EtOH at room temperature by slow evaporation of solvent. A suitable crystal was selected for structure determination on a SuperNova, Dual, Cu at zero, AtlasS2 diffractometer. The crystal was kept at 170.1(3) K during data collection. Using Olex2<sup>[1]</sup>, the structure was solved with the SHELXS<sup>[2]</sup> structure solution program using Direct Methods and refined with the SHELXL<sup>[3]</sup> refinement package using Least Squares minimisation.

- [1] Dolomanov, O. V.; Bourhis, L. J.; Gildea, R. J, Howard, J. A. K.; Puschmann, H. *J. Appl. Cryst.* 2009, 42, 339-341.  
 [2] Sheldrick, G. M. *Acta Cryst.* 2008, A64, 112-122.  
 [3] Sheldrick, G. M. *Acta Cryst.* 2015, C71, 3-8.

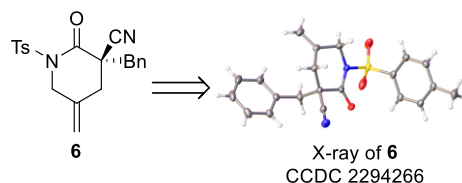

ORTEP of **6** (at 50% level)

### Crystal data and structure refinement for **6**

| Identification code | <b>6</b>                                                 |
|---------------------|----------------------------------------------------------|
| Empirical formula   | $\text{C}_{21}\text{H}_{20}\text{N}_2\text{O}_3\text{S}$ |
| Formula weight      | 380.45                                                   |
| Temperature/K       | 99.96(16)                                                |
| Crystal system      | orthorhombic                                             |
| Space group         | $\text{P}2_12_12_1$                                      |
| $a/\text{\AA}$      | 7.46283(5)                                               |
| $b/\text{\AA}$      | 13.94255(10)                                             |
| $c/\text{\AA}$      | 18.09638(13)                                             |
| $\alpha/^\circ$     | 90                                                       |
| $\beta/^\circ$      | 90                                                       |
| $\gamma/^\circ$     | 90                                                       |

|                                             |                                                               |
|---------------------------------------------|---------------------------------------------------------------|
| Volume/Å <sup>3</sup>                       | 1882.94(2)                                                    |
| Z                                           | 4                                                             |
| ρ <sub>calc</sub> /g/cm <sup>3</sup>        | 1.342                                                         |
| μ/mm <sup>-1</sup>                          | 1.727                                                         |
| F(000)                                      | 800.0                                                         |
| Crystal size/mm <sup>3</sup>                | 0.16 × 0.12 × 0.1                                             |
| Radiation                                   | Cu Kα (λ = 1.54184)                                           |
| 2θ range for data collection/°              | 8.006 to 148.658                                              |
| Index ranges                                | -9 ≤ h ≤ 4, -16 ≤ k ≤ 17, -22 ≤ l ≤ 15                        |
| Reflections collected                       | 9403                                                          |
| Independent reflections                     | 3718 [R <sub>int</sub> = 0.0136, R <sub>sigma</sub> = 0.0135] |
| Data/restraints/parameters                  | 3718/0/254                                                    |
| Goodness-of-fit on F <sup>2</sup>           | 1.051                                                         |
| Final R indexes [I >= 2σ (I)]               | R <sub>1</sub> = 0.0230, wR <sub>2</sub> = 0.0620             |
| Final R indexes [all data]                  | R <sub>1</sub> = 0.0231, wR <sub>2</sub> = 0.0621             |
| Largest diff. peak/hole / e Å <sup>-3</sup> | 0.21/-0.23                                                    |
| Flack/Hoofit parameter                      | 0.009(5)/-0.005(3)                                            |

---

## 9. The copies of $^1\text{H}$ NMR, $^{13}\text{C}$ NMR and HPLC spectra for compounds 3, 5, 6

### $^1\text{H}$ NMR (400 MHz, $\text{CDCl}_3$ ) and $^{13}\text{C}$ NMR (101 MHz, $\text{CDCl}_3$ ) of 3a

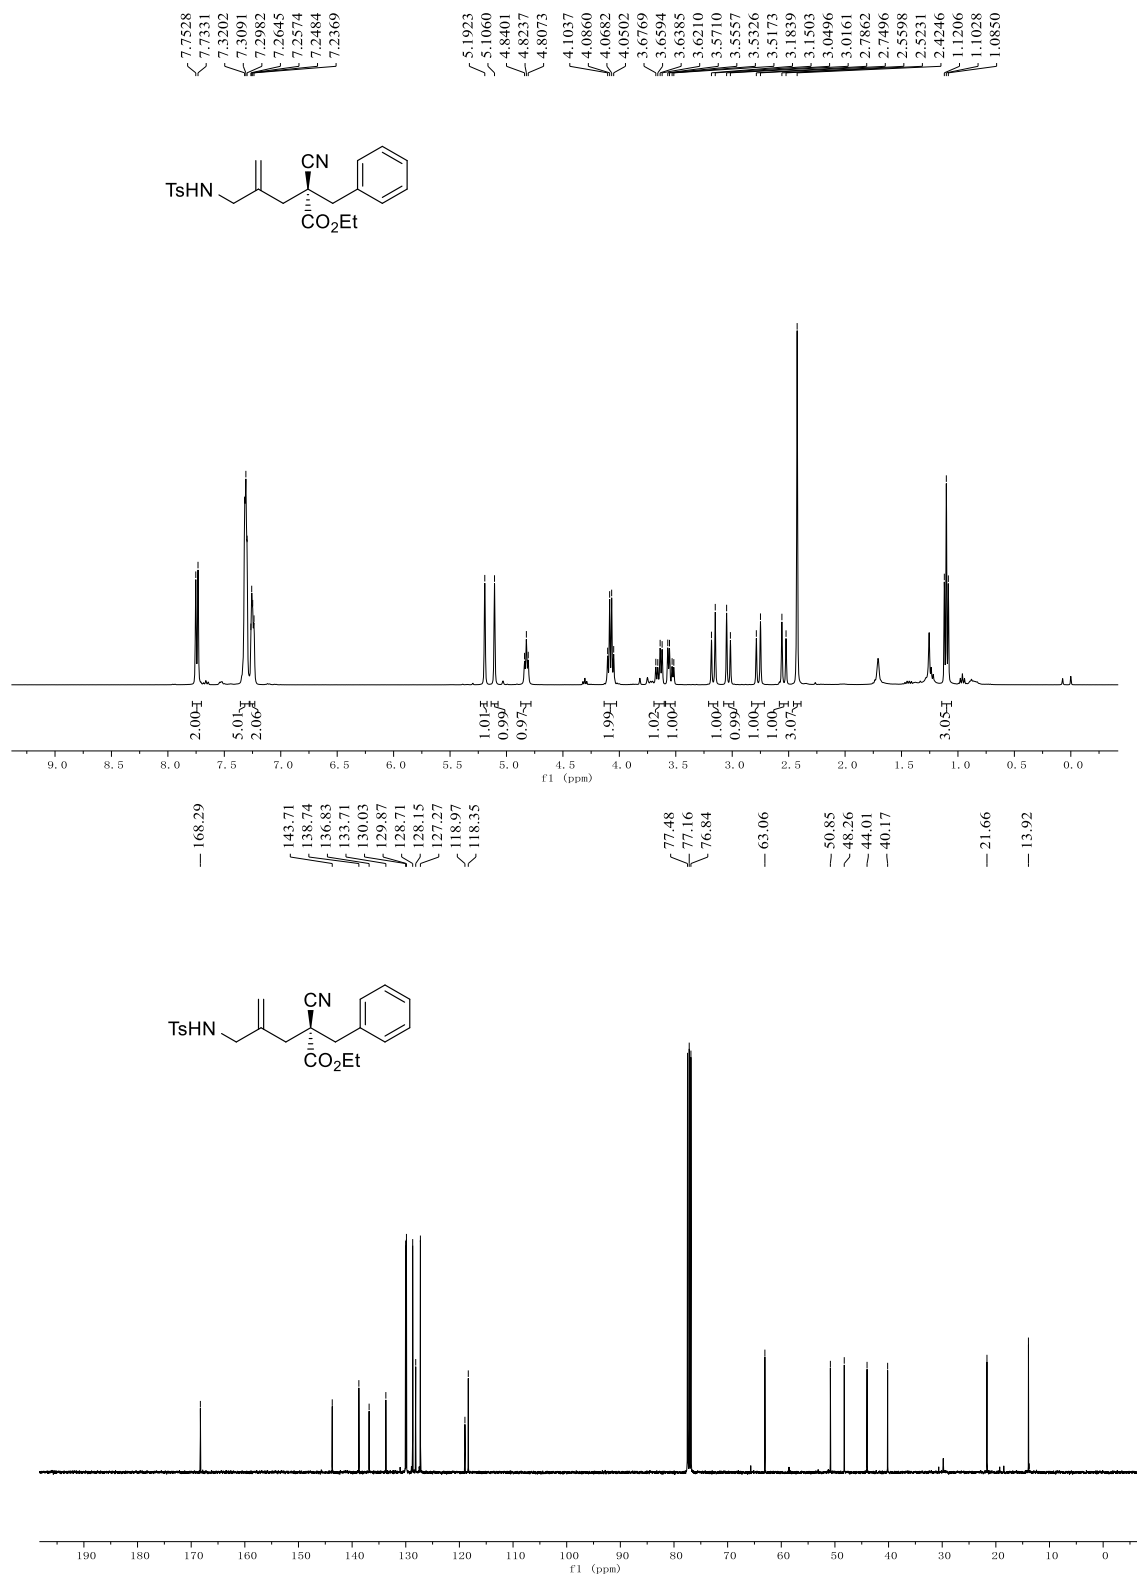

### HPLC spectra of 3a

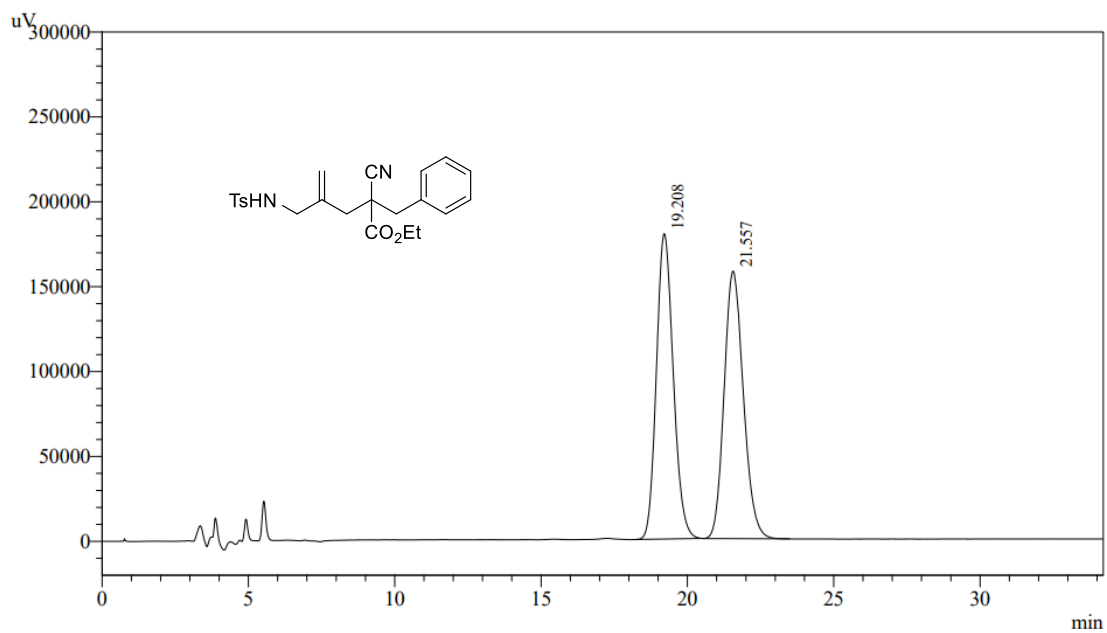

Detector A Ch1 220nm

| Peak# | Ret. Time | Area     | Height | Area %  | Height % |
|-------|-----------|----------|--------|---------|----------|
| 1     | 19.208    | 7201606  | 179866 | 49.974  | 53.304   |
| 2     | 21.557    | 7209198  | 157568 | 50.026  | 46.696   |
| Total |           | 14410804 | 337435 | 100.000 | 100.000  |

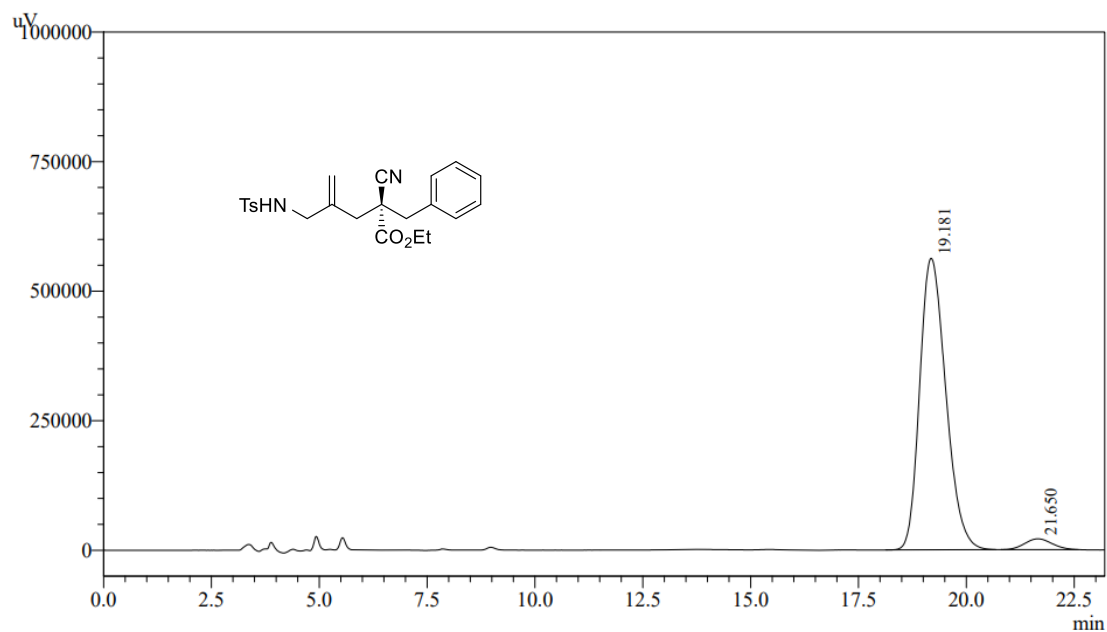

Detector A Ch1 220nm

| Peak# | Ret. Time | Area     | Height | Area %  | Height % |
|-------|-----------|----------|--------|---------|----------|
| 1     | 19.181    | 23710053 | 562554 | 96.281  | 96.432   |
| 2     | 21.650    | 915844   | 20812  | 3.719   | 3.568    |
| Total |           | 24625898 | 583365 | 100.000 | 100.000  |

**<sup>1</sup>H NMR (400 MHz, CDCl<sub>3</sub>) and <sup>13</sup>C NMR (101 MHz, CDCl<sub>3</sub>) of 3b**

7.8039  
7.7847  
7.5291  
7.5113  
7.4936  
7.4626  
7.4439  
7.4252  
7.2468  
7.2328  
7.1805  
7.1609  
5.1192  
5.0311  
4.8949  
4.8787  
4.8625  
4.8268  
4.0093  
3.9915  
3.9739  
3.6271  
3.6119  
3.5888  
3.5739  
3.5202  
3.5084  
3.4821  
3.4700  
3.1068  
3.0733  
2.9752  
2.9417  
2.7030  
2.6663  
2.4770  
2.4403  
1.0431  
1.0254  
1.0076

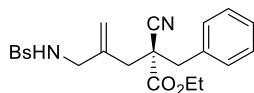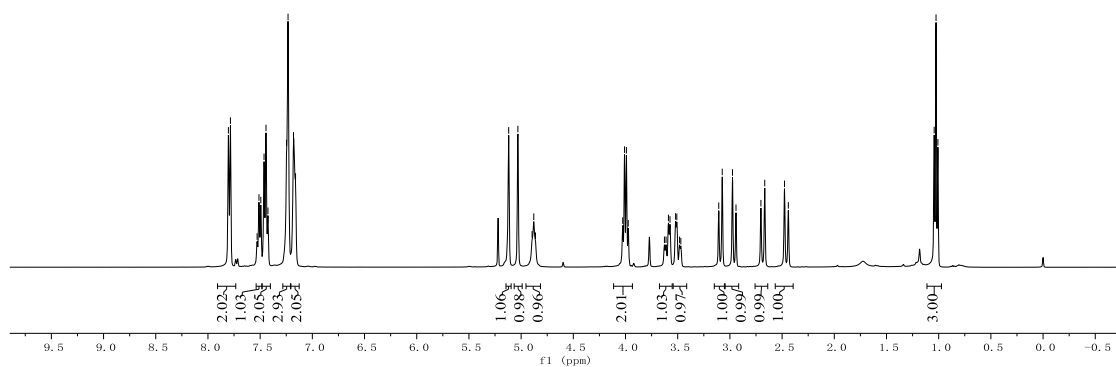

168.27  
139.88  
138.67  
133.70  
132.88  
130.02  
129.27  
128.70  
128.14  
127.20  
118.96  
118.42  
77.48  
77.16  
76.84  
63.06  
50.85  
48.24  
44.01  
40.17  
13.92

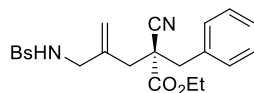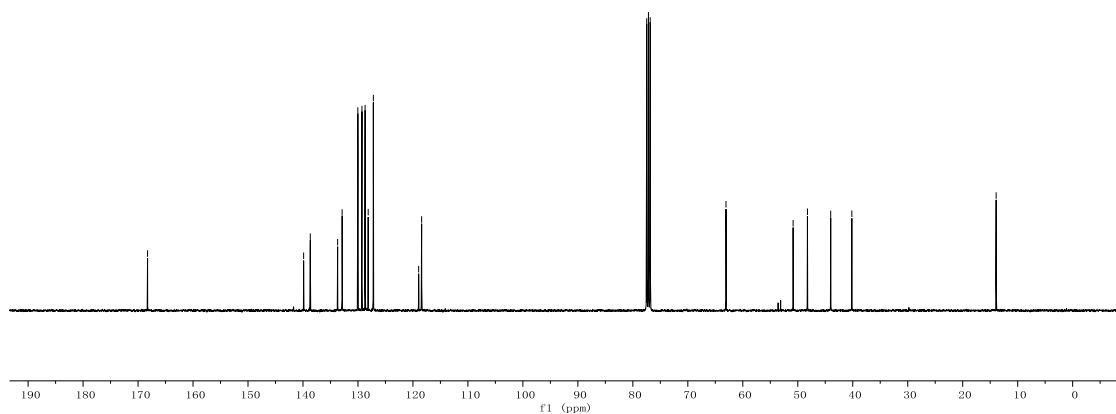

### HPLC spectra of 3b

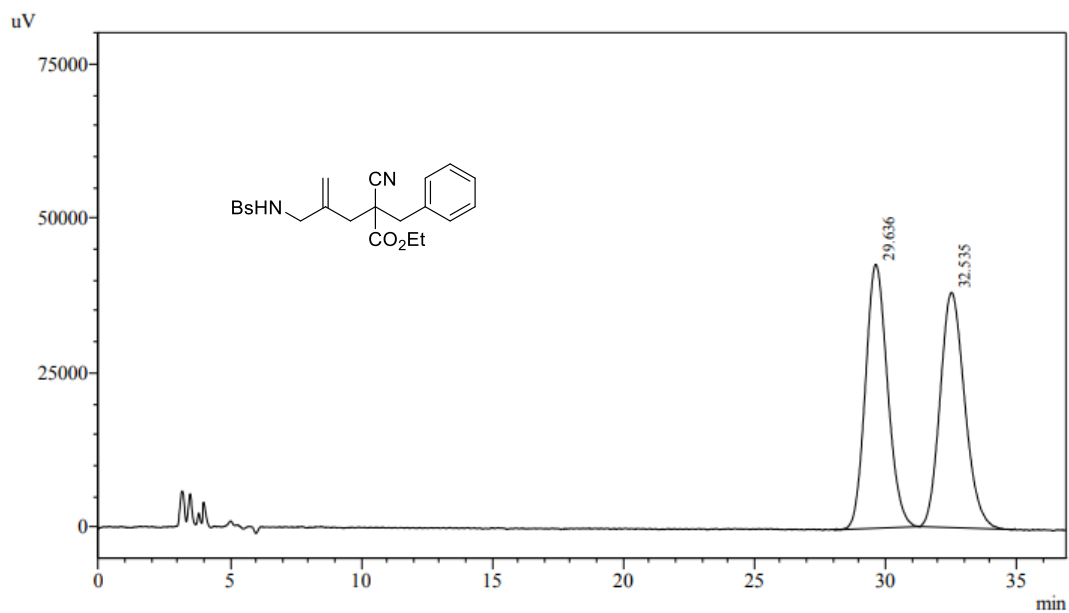

Detector A Ch1 220nm

| Peak# | Ret. Time | Area    | Height | Area %  | Height % |
|-------|-----------|---------|--------|---------|----------|
| 1     | 29.636    | 2500643 | 42706  | 50.118  | 52.872   |
| 2     | 32.535    | 2488913 | 38067  | 49.882  | 47.128   |
| Total |           | 4989556 | 80773  | 100.000 | 100.000  |

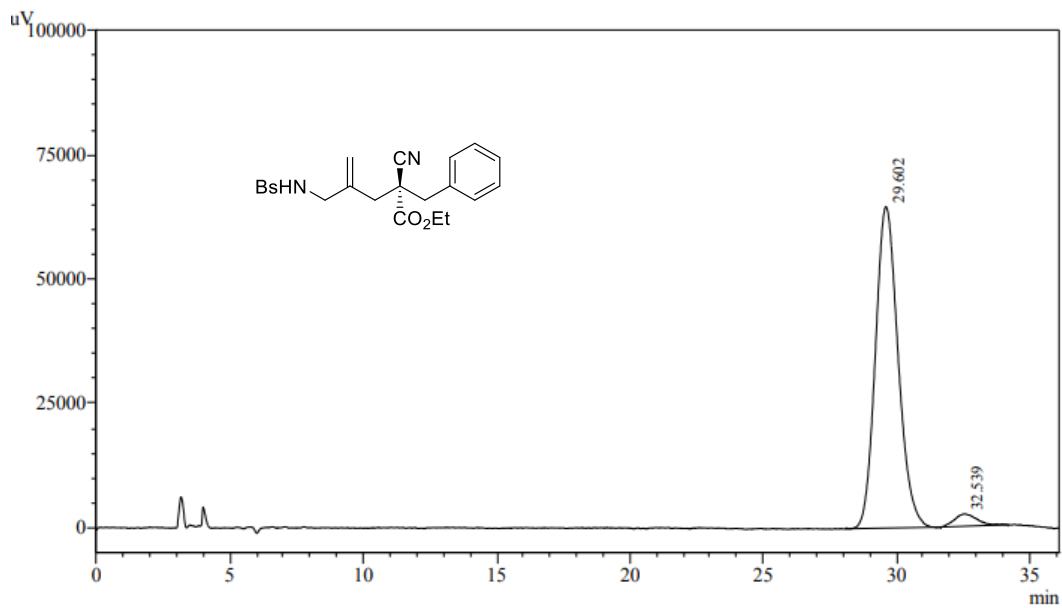

Detector A Ch1 220nm

| Peak# | Ret. Time | Area    | Height | Area %  | Height % |
|-------|-----------|---------|--------|---------|----------|
| 1     | 29.602    | 3821516 | 64644  | 96.386  | 96.331   |
| 2     | 32.539    | 143283  | 2462   | 3.614   | 3.669    |
| Total |           | 3964799 | 67106  | 100.000 | 100.000  |

**<sup>1</sup>H NMR (400 MHz, CDCl<sub>3</sub>) and <sup>13</sup>C NMR (101 MHz, CDCl<sub>3</sub>) of 3c**

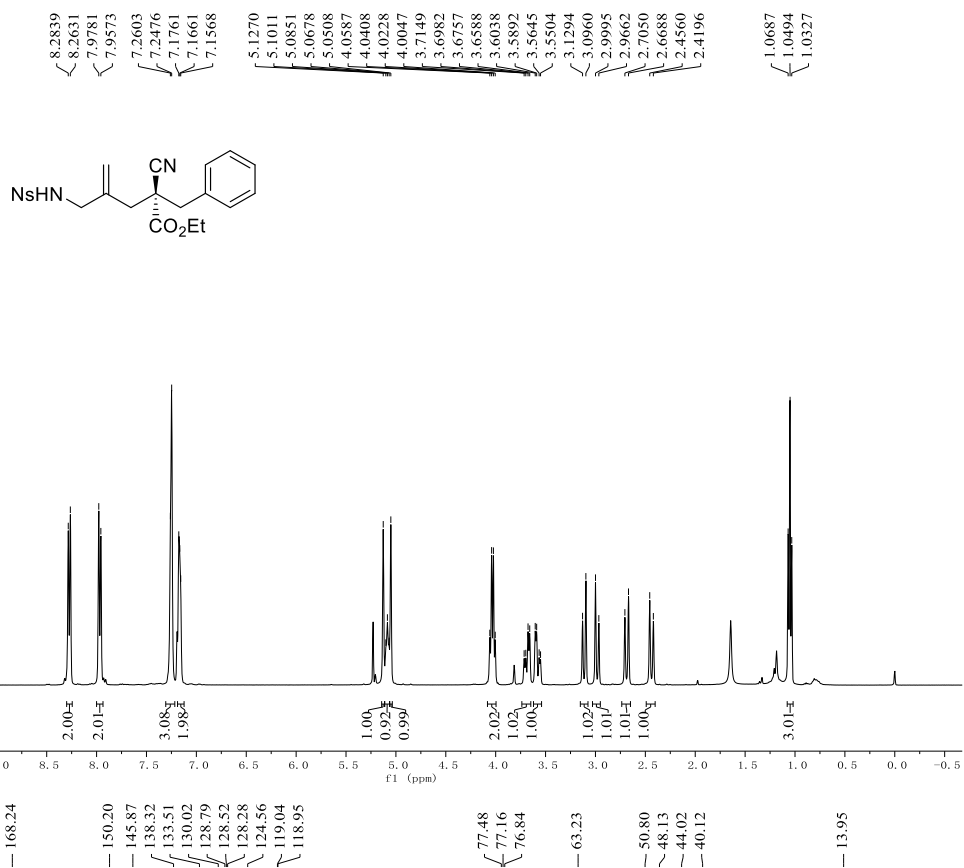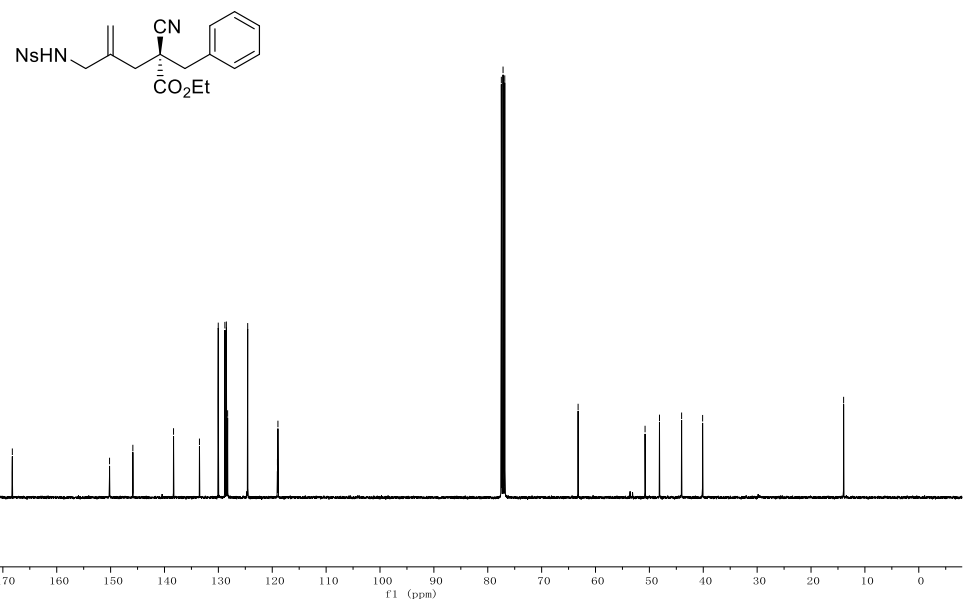



### HPLC spectra of 3c

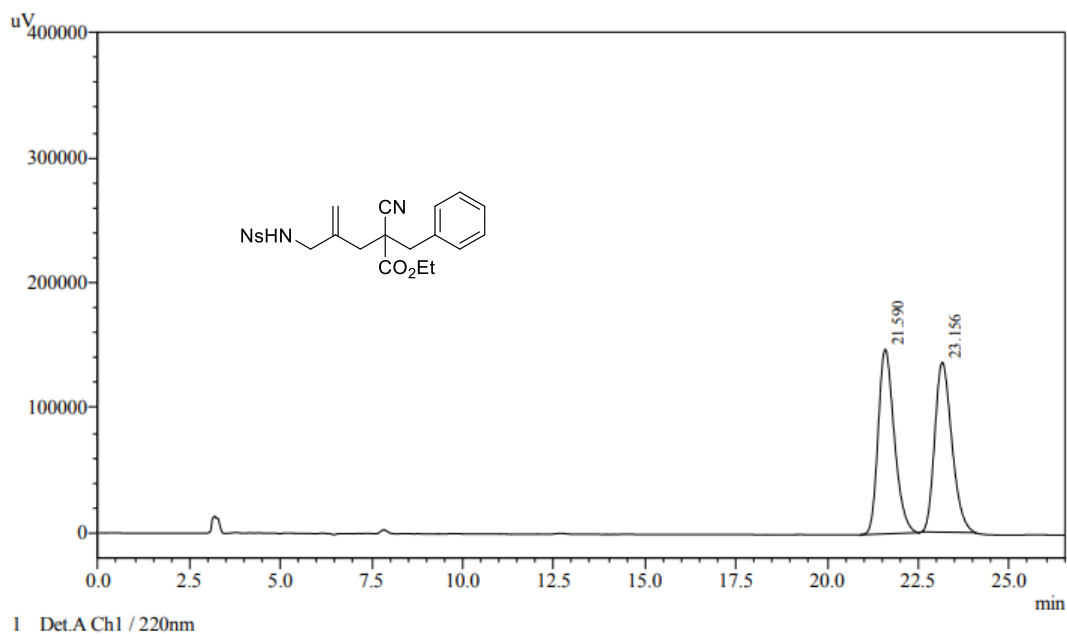

Detector A Ch1 220nm

| Peak# | Ret. Time | Area    | Height | Area %  | Height % |
|-------|-----------|---------|--------|---------|----------|
| 1     | 21.590    | 4547190 | 147614 | 50.583  | 52.080   |
| 2     | 23.156    | 4442299 | 135823 | 49.417  | 47.920   |
| Total |           | 8989489 | 283436 | 100.000 | 100.000  |

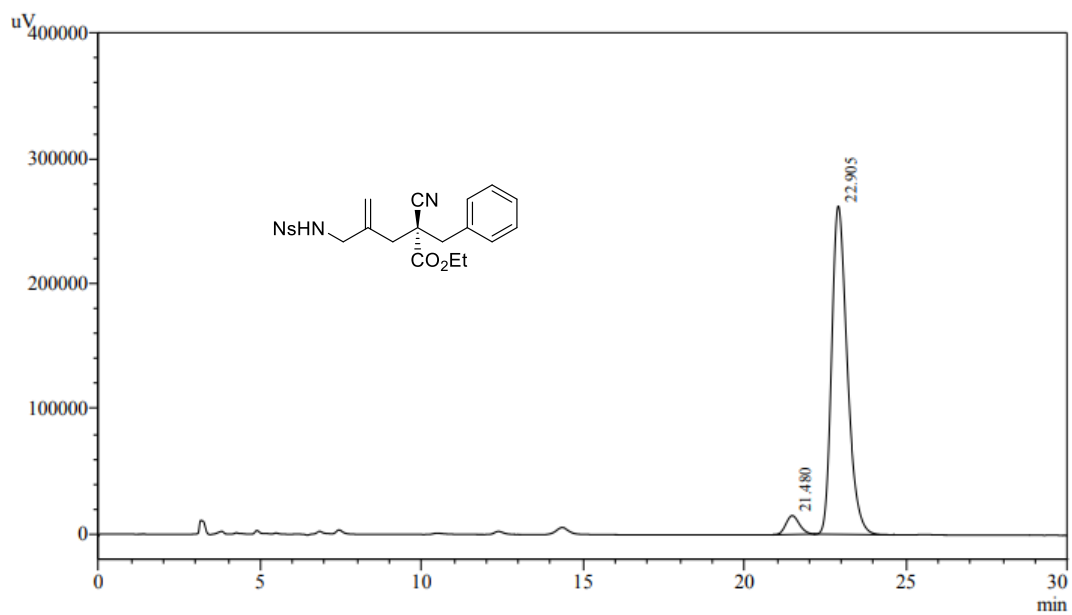

Detector A Ch1 220nm

| Peak# | Ret. Time | Area    | Height | Area %  | Height % |
|-------|-----------|---------|--------|---------|----------|
| 1     | 21.480    | 431654  | 15003  | 4.700   | 5.413    |
| 2     | 22.905    | 8752835 | 262178 | 95.300  | 94.587   |
| Total |           | 9184489 | 277181 | 100.000 | 100.000  |

**<sup>1</sup>H NMR (400 MHz, CDCl<sub>3</sub>) and <sup>13</sup>C NMR (101 MHz, CDCl<sub>3</sub>) of 3d**

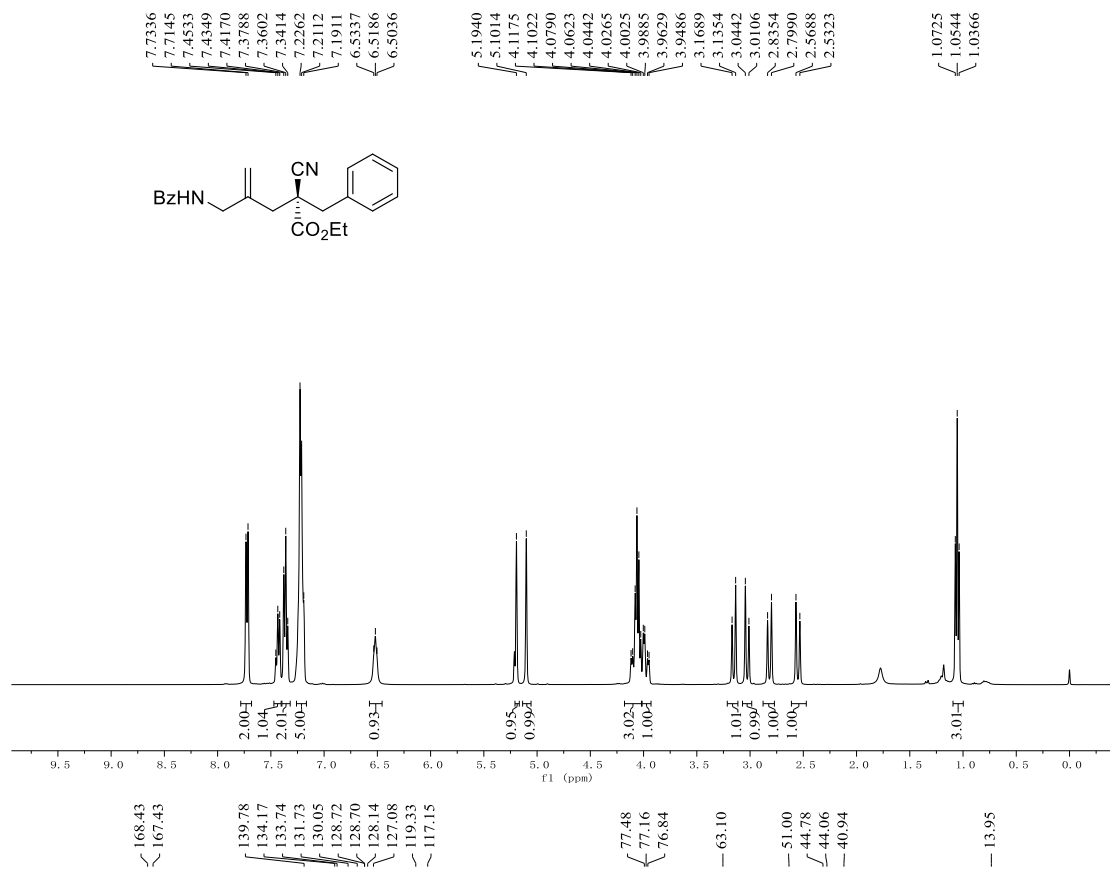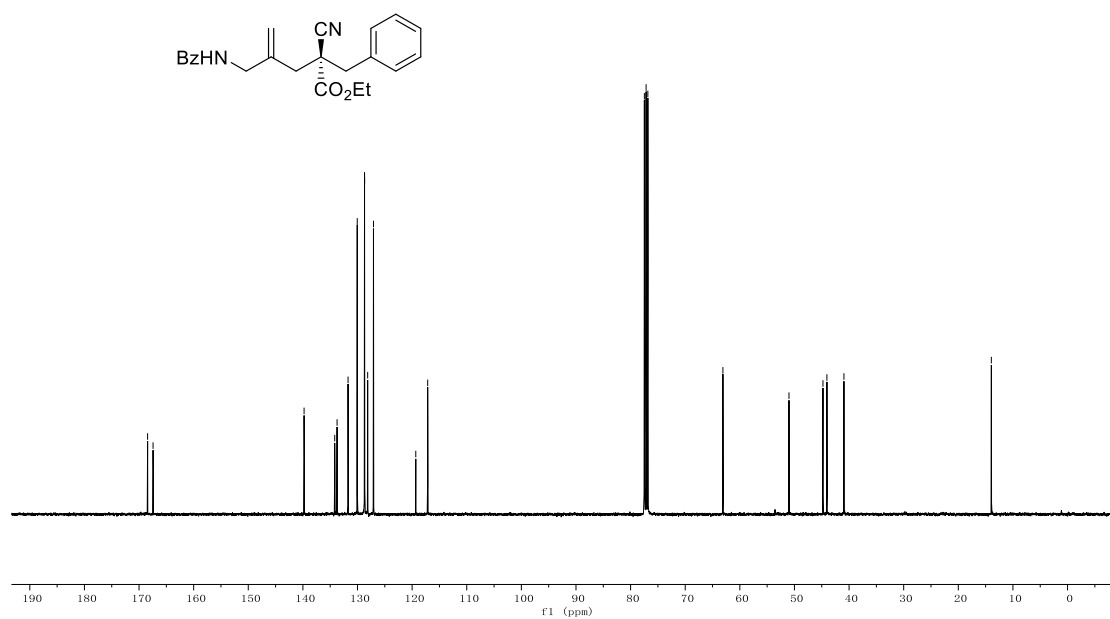

### HPLC spectra of 3d

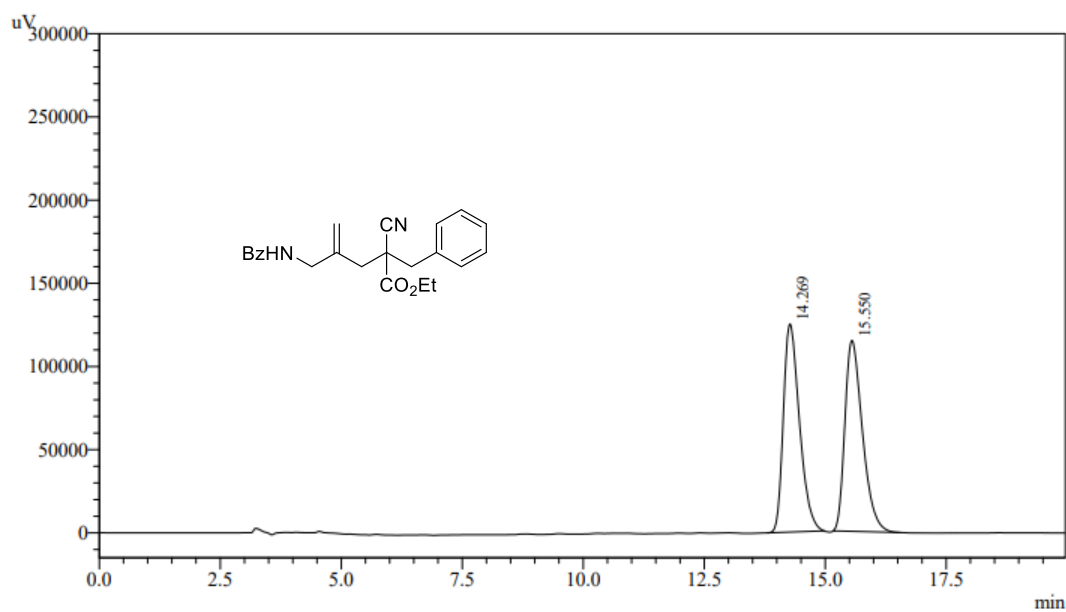

1 Det.A Ch1 / 254nm

Detector A Ch1 254nm

| Peak# | Ret. Time | Area    | Height | Area %  | Height % |
|-------|-----------|---------|--------|---------|----------|
| 1     | 14.269    | 2897619 | 125117 | 49.994  | 52.162   |
| 2     | 15.550    | 2898265 | 114743 | 50.006  | 47.838   |
| Total |           | 5795884 | 239861 | 100.000 | 100.000  |

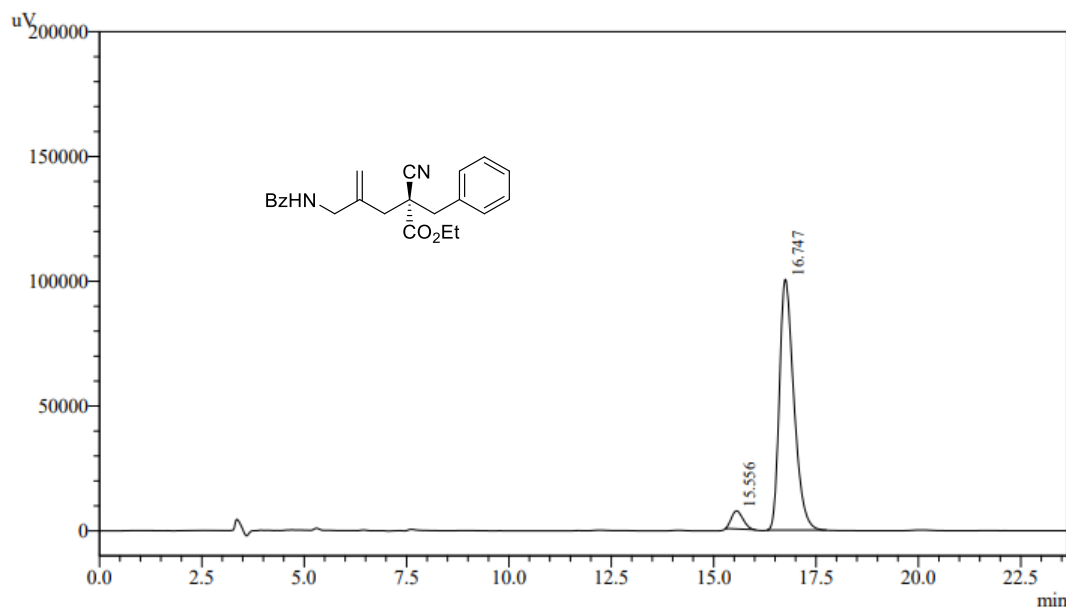

1 Det.A Ch1 / 254nm

Detector A Ch1 254nm

| Peak# | Ret. Time | Area    | Height | Area %  | Height % |
|-------|-----------|---------|--------|---------|----------|
| 1     | 15.556    | 141871  | 7246   | 5.426   | 6.727    |
| 2     | 16.747    | 2472612 | 100461 | 94.574  | 93.273   |
| Total |           | 2614484 | 107706 | 100.000 | 100.000  |

**<sup>1</sup>H NMR (400 MHz, CDCl<sub>3</sub>) and <sup>13</sup>C NMR (101 MHz, CDCl<sub>3</sub>) of 3e**

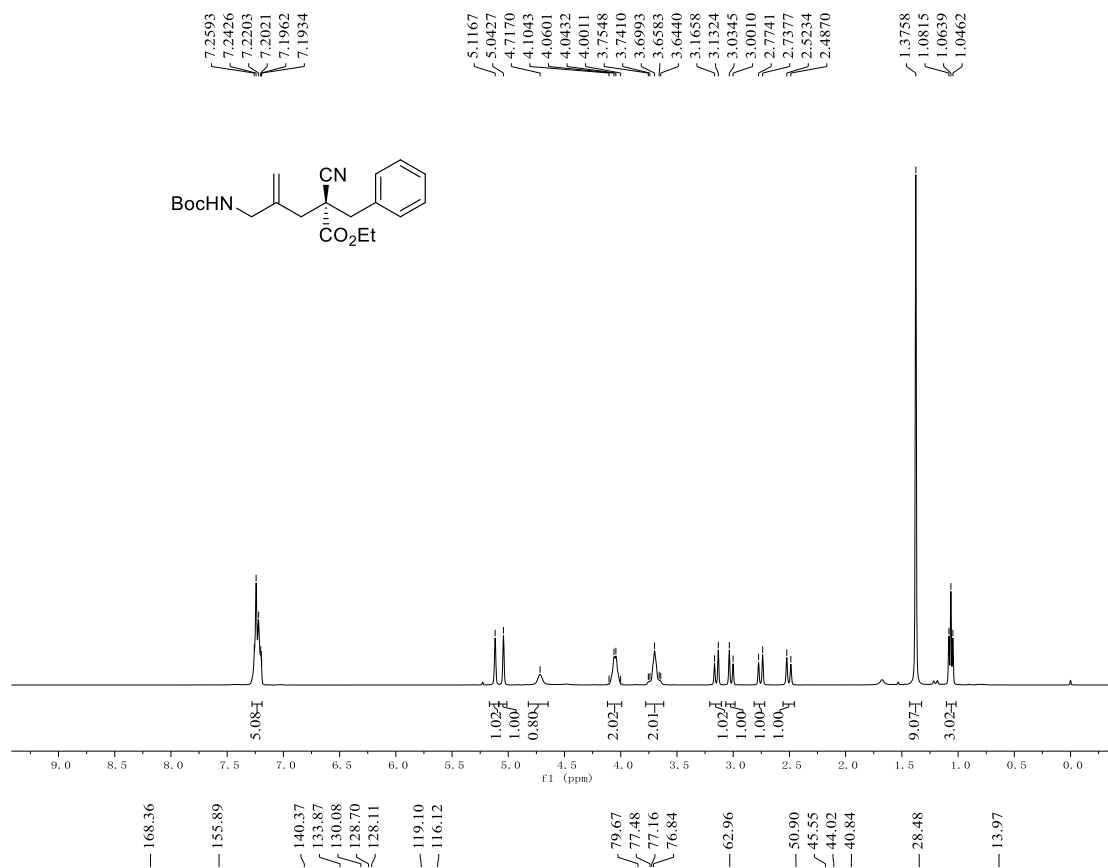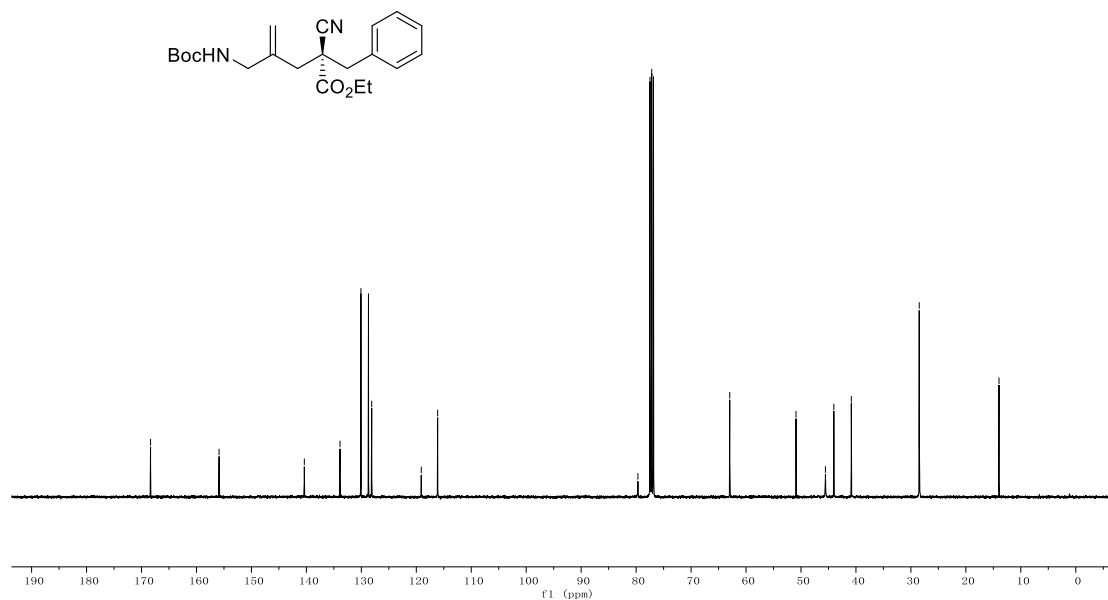

### HPLC spectra of 3e

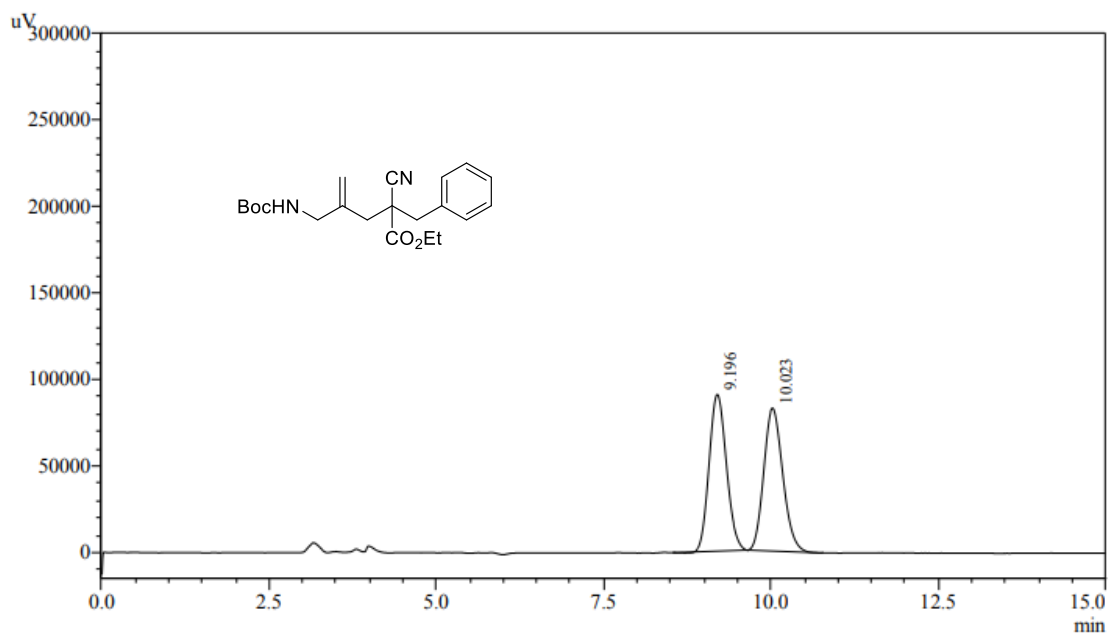

Detector A Ch1 220nm

| Peak# | Ret. Time | Area    | Height | Area %  | Height % |
|-------|-----------|---------|--------|---------|----------|
| 1     | 9.196     | 1620350 | 90634  | 49.696  | 52.297   |
| 2     | 10.023    | 1640172 | 82671  | 50.304  | 47.703   |
| Total |           | 3260522 | 173305 | 100.000 | 100.000  |

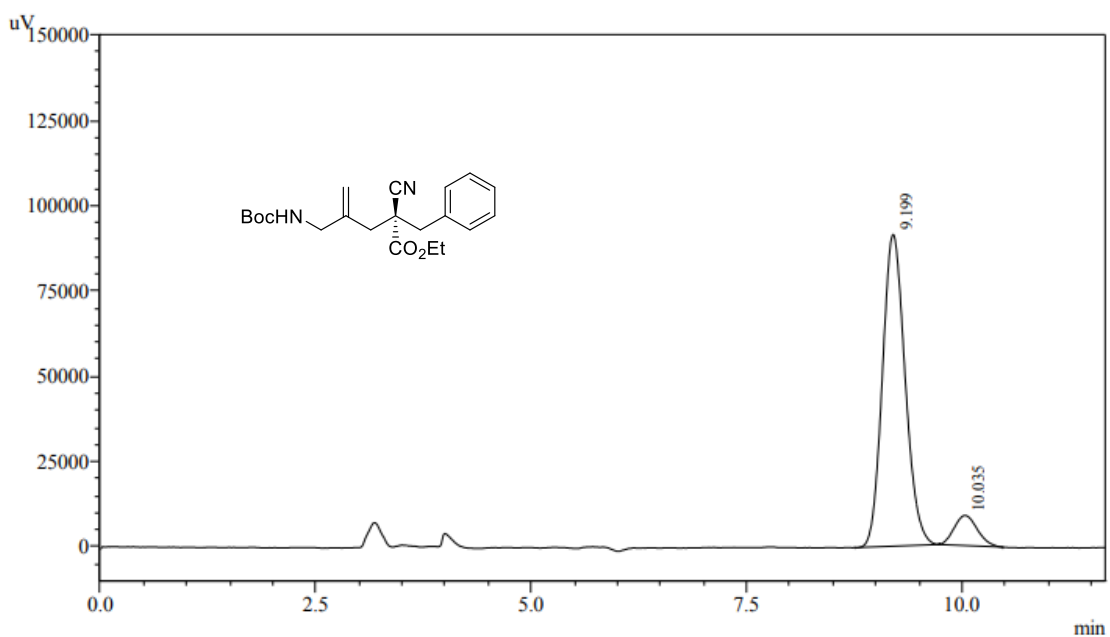

Detector A Ch1 220nm

| Peak# | Ret. Time | Area    | Height | Area %  | Height % |
|-------|-----------|---------|--------|---------|----------|
| 1     | 9.199     | 1673505 | 91361  | 91.046  | 91.201   |
| 2     | 10.035    | 164589  | 8814   | 8.954   | 8.799    |
| Total |           | 1838094 | 100176 | 100.000 | 100.000  |

**$^1\text{H}$  NMR (400 MHz,  $\text{CDCl}_3$ ) and  $^{13}\text{C}$  NMR (101 MHz,  $\text{CDCl}_3$ ) of 3f**

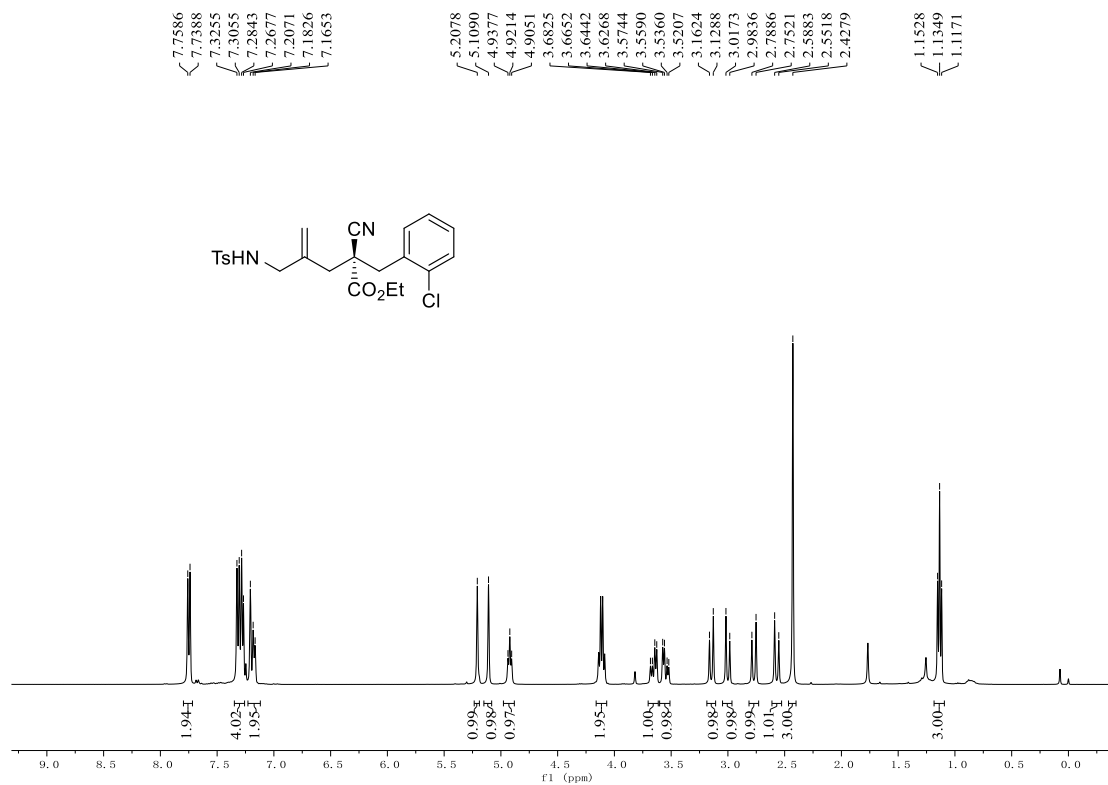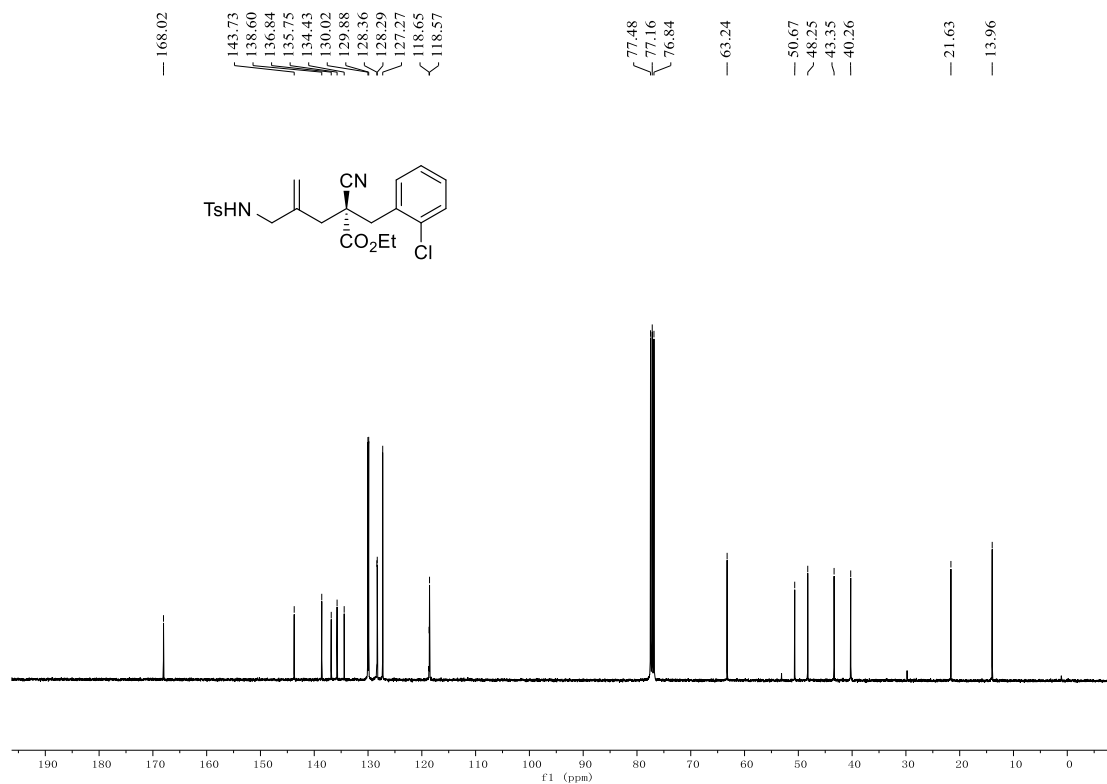

### HPLC spectra of 3f

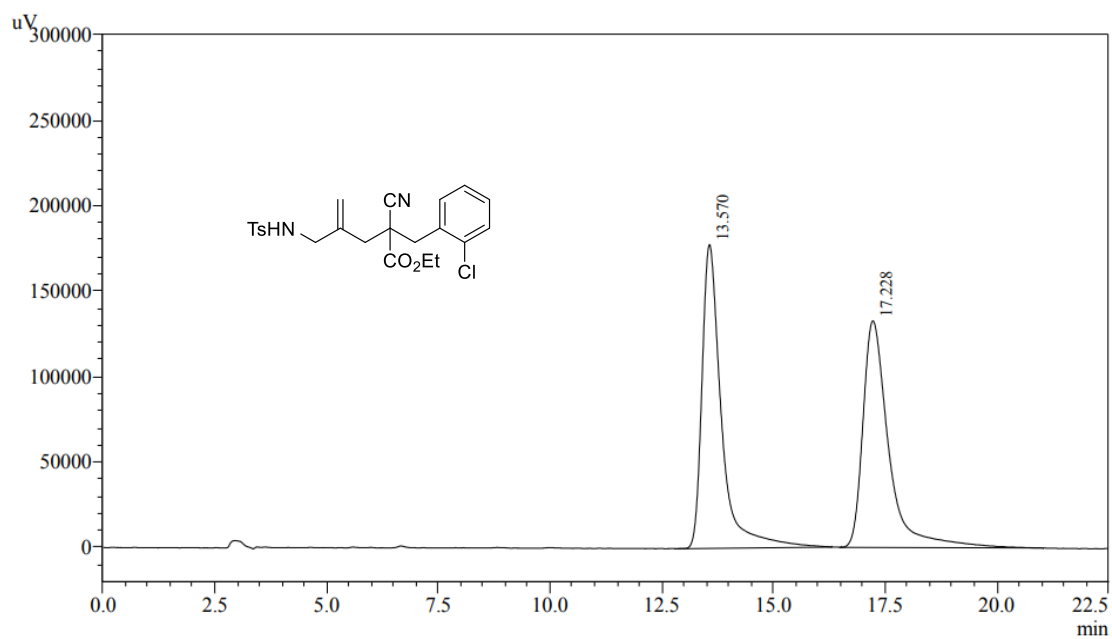

Detector A Ch1 220nm

| Peak# | Ret. Time | Area     | Height | Area %  | Height % |
|-------|-----------|----------|--------|---------|----------|
| 1     | 13.570    | 5398472  | 177735 | 50.245  | 57.268   |
| 2     | 17.228    | 5345857  | 132621 | 49.755  | 42.732   |
| Total |           | 10744329 | 310356 | 100.000 | 100.000  |

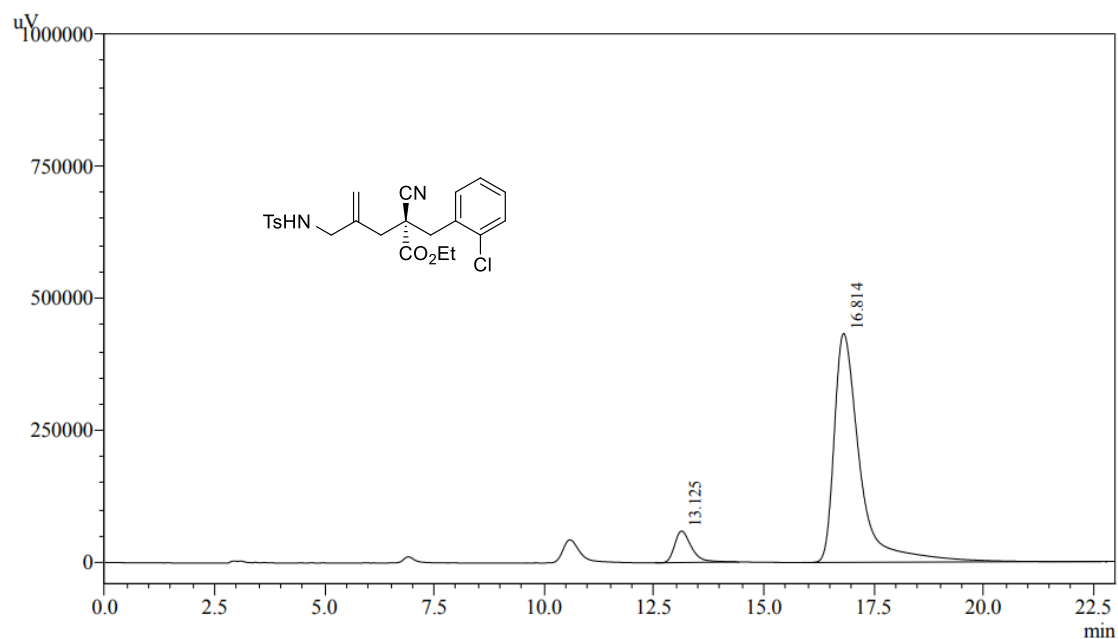

Detector A Ch1 220nm

| Peak# | Ret. Time | Area     | Height | Area %  | Height % |
|-------|-----------|----------|--------|---------|----------|
| 1     | 13.125    | 1597926  | 59701  | 8.270   | 12.110   |
| 2     | 16.814    | 17724268 | 433281 | 91.730  | 87.890   |
| Total |           | 19322194 | 492982 | 100.000 | 100.000  |

**<sup>1</sup>H NMR (400 MHz, CDCl<sub>3</sub>) and <sup>13</sup>C NMR (101 MHz, CDCl<sub>3</sub>) of 3g**

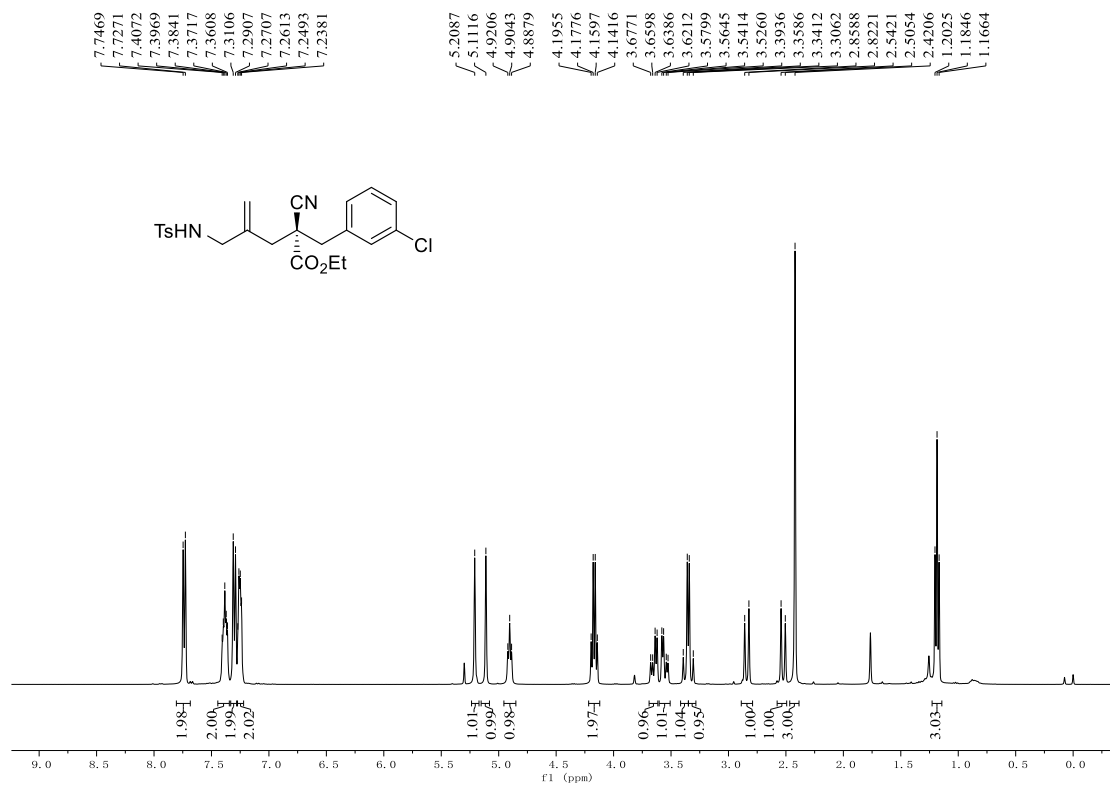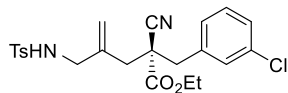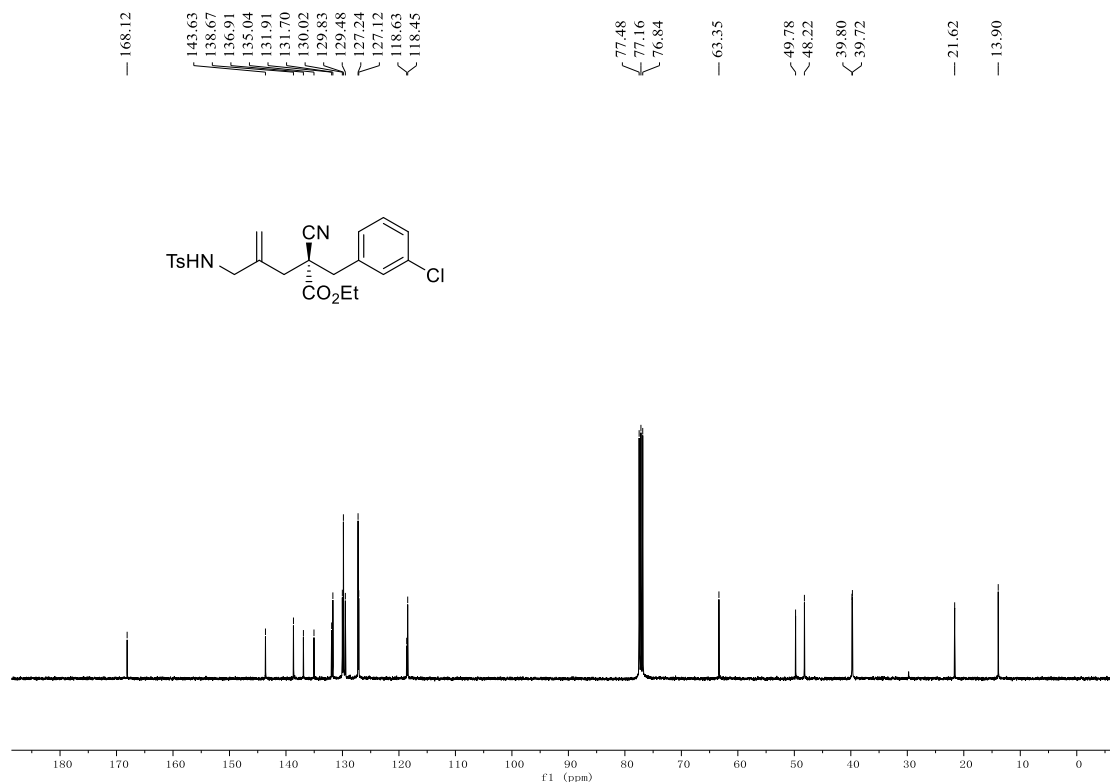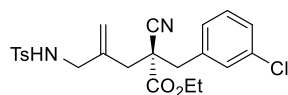



### HPLC spectra of 3g

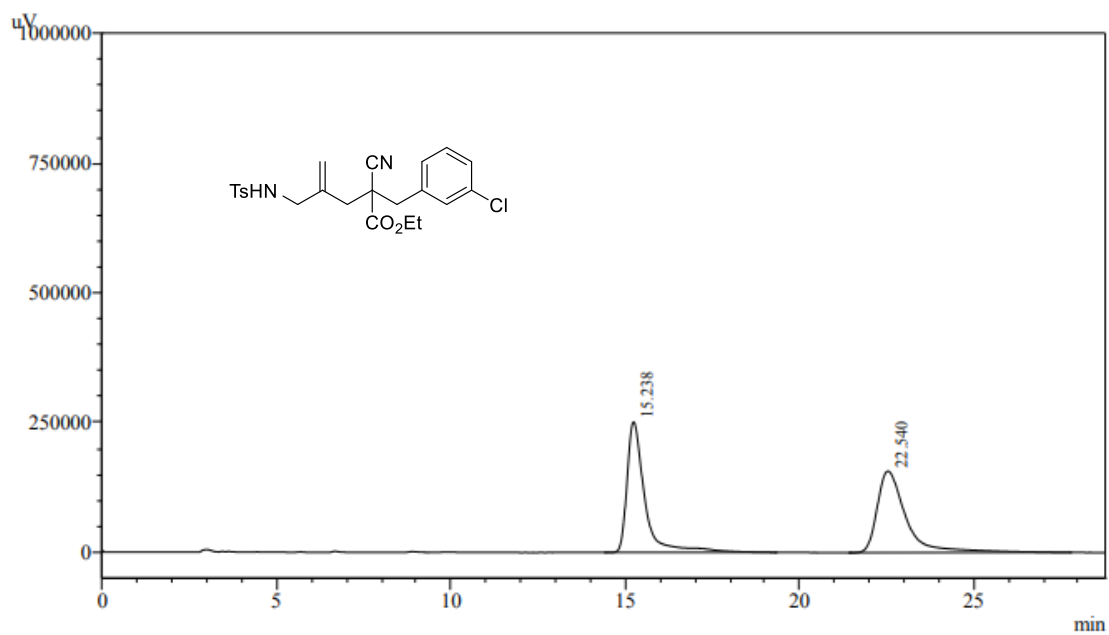

1 Det.A Ch1 / 220nm

Detector A Ch1 220nm

| Peak# | Ret. Time | Area     | Height | Area %  | Height % |
|-------|-----------|----------|--------|---------|----------|
| 1     | 15.238    | 9001603  | 251257 | 49.874  | 61.537   |
| 2     | 22.540    | 9046940  | 157047 | 50.126  | 38.463   |
| Total |           | 18048543 | 408304 | 100.000 | 100.000  |

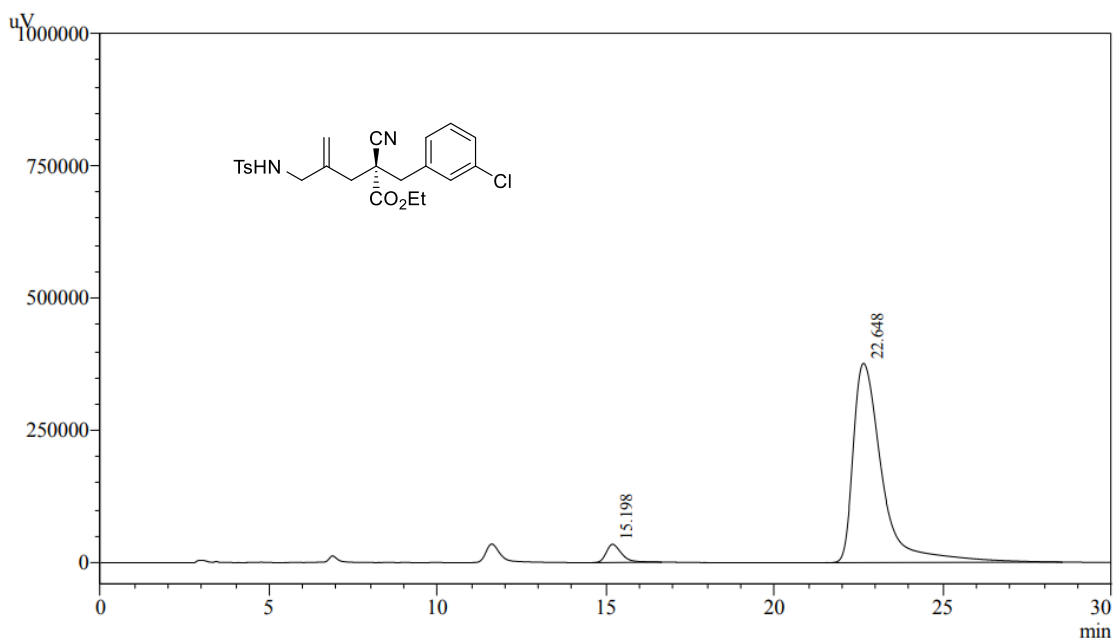

1 Det.A Ch1 / 220nm

Detector A Ch1 220nm

| Peak# | Ret. Time | Area     | Height | Area %  | Height % |
|-------|-----------|----------|--------|---------|----------|
| 1     | 15.198    | 1076455  | 34331  | 4.554   | 8.349    |
| 2     | 22.648    | 22560384 | 376864 | 95.446  | 91.651   |
| Total |           | 23636839 | 411196 | 100.000 | 100.000  |

**<sup>1</sup>H NMR (400 MHz, CDCl<sub>3</sub>) and <sup>13</sup>C NMR (101 MHz, CDCl<sub>3</sub>) of 3h**

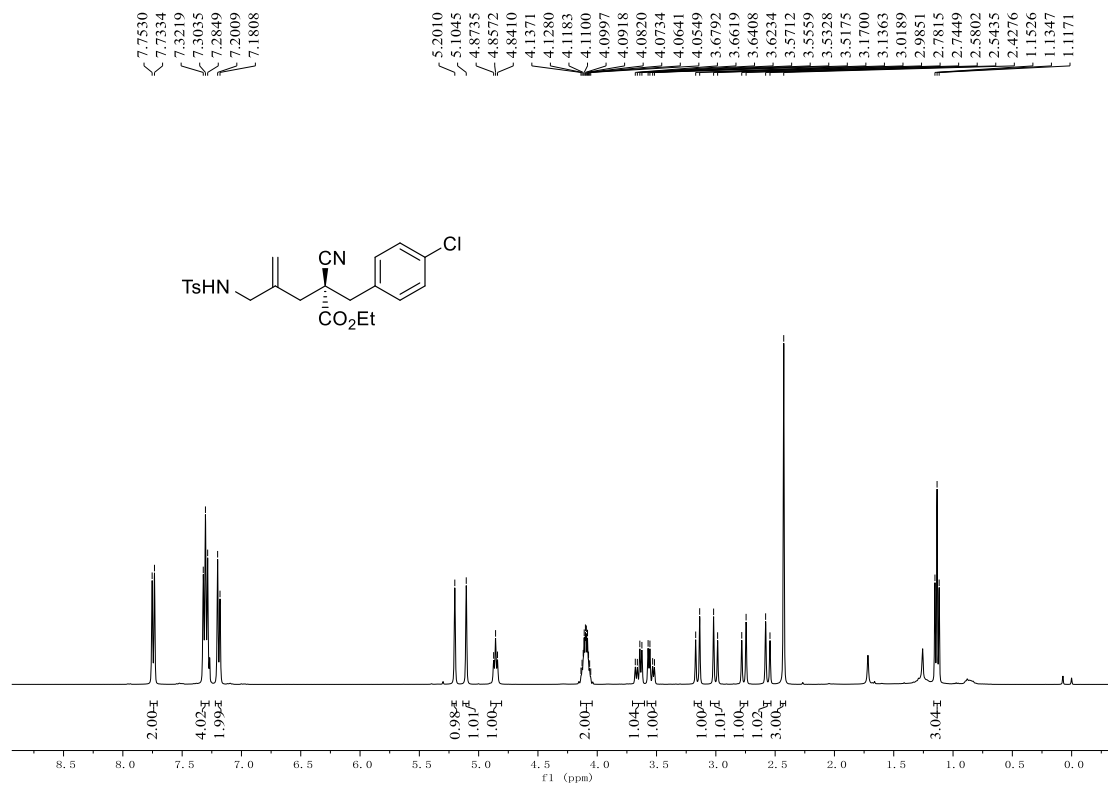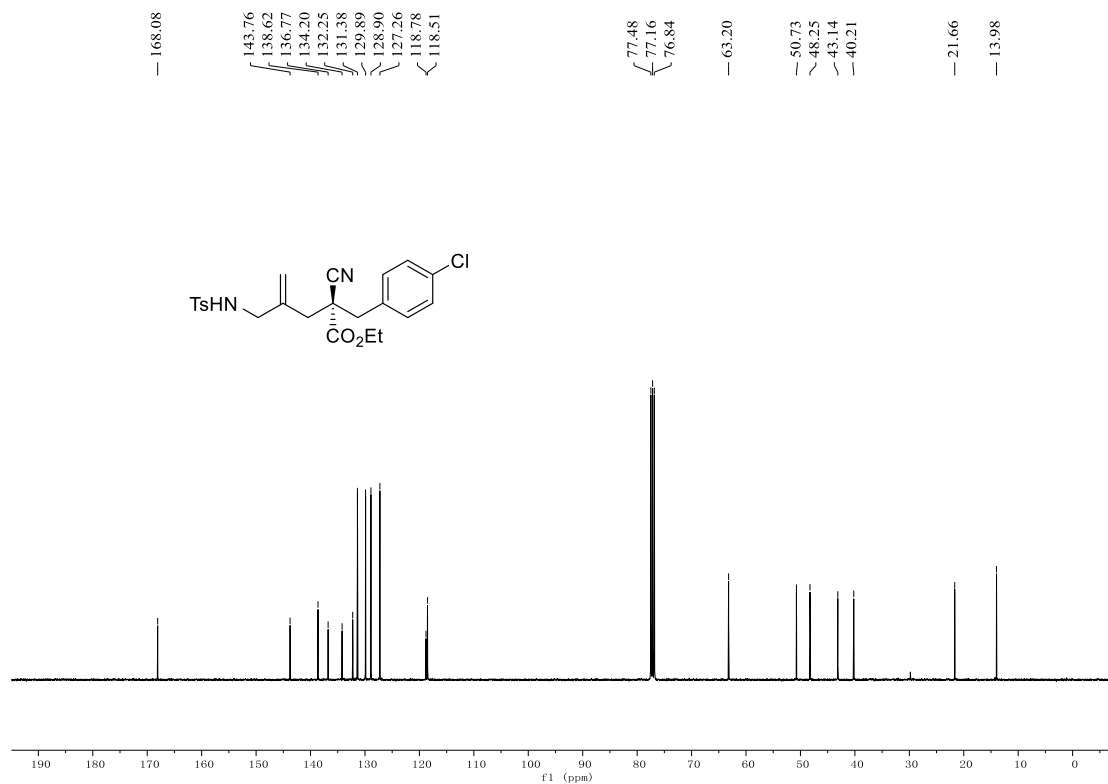

### HPLC spectra of 3h

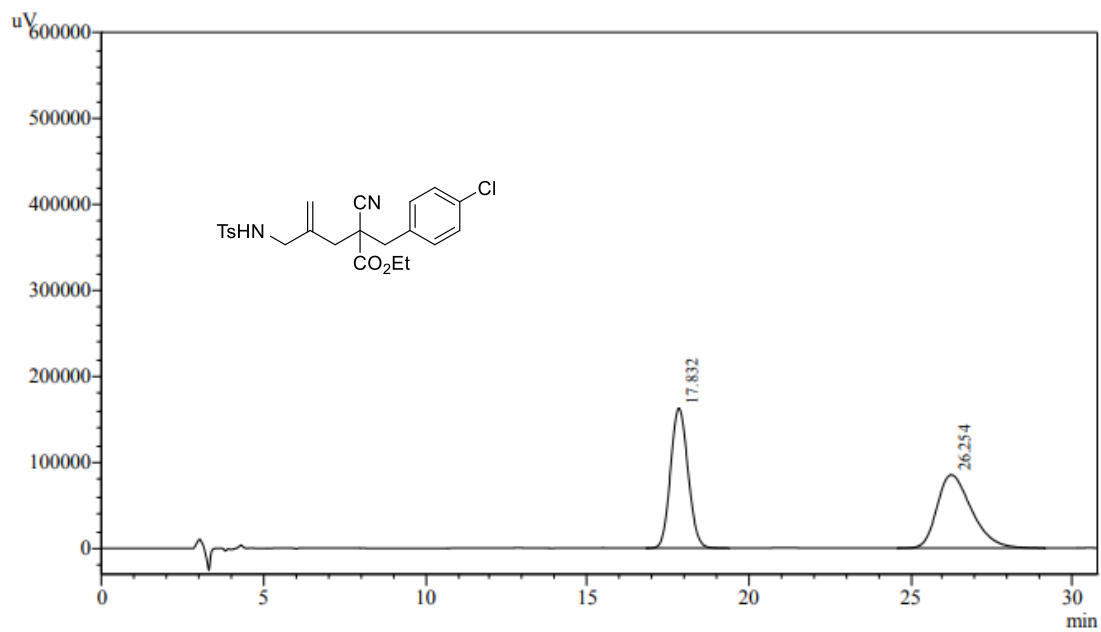

Detector A Ch1 220nm

| Peak# | Ret. Time | Area     | Height | Area %  | Height % |
|-------|-----------|----------|--------|---------|----------|
| 1     | 17.832    | 6117205  | 162843 | 49.228  | 65.648   |
| 2     | 26.254    | 6309120  | 85213  | 50.772  | 34.352   |
| Total |           | 12426324 | 248056 | 100.000 | 100.000  |

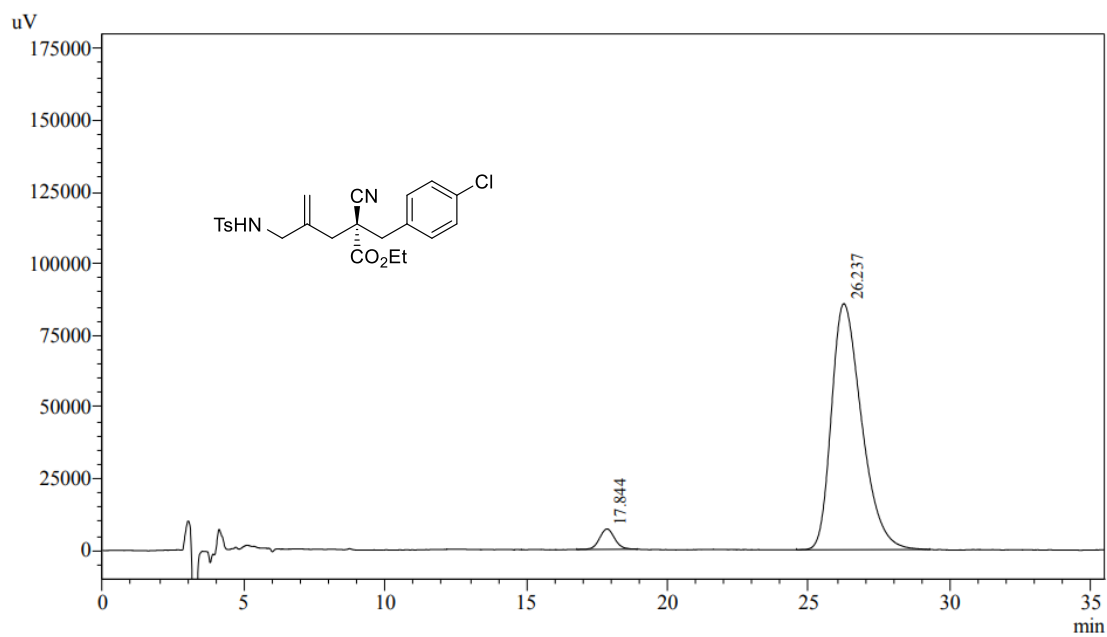

Detector A Ch1 220nm

| Peak# | Ret. Time | Area    | Height | Area %  | Height % |
|-------|-----------|---------|--------|---------|----------|
| 1     | 17.844    | 264684  | 7107   | 3.980   | 7.648    |
| 2     | 26.237    | 6386421 | 85815  | 96.020  | 92.352   |
| Total |           | 6651105 | 92922  | 100.000 | 100.000  |

# <sup>1</sup>H NMR (400 MHz, CDCl<sub>3</sub>) and <sup>13</sup>C NMR (101 MHz, CDCl<sub>3</sub>) of 3i

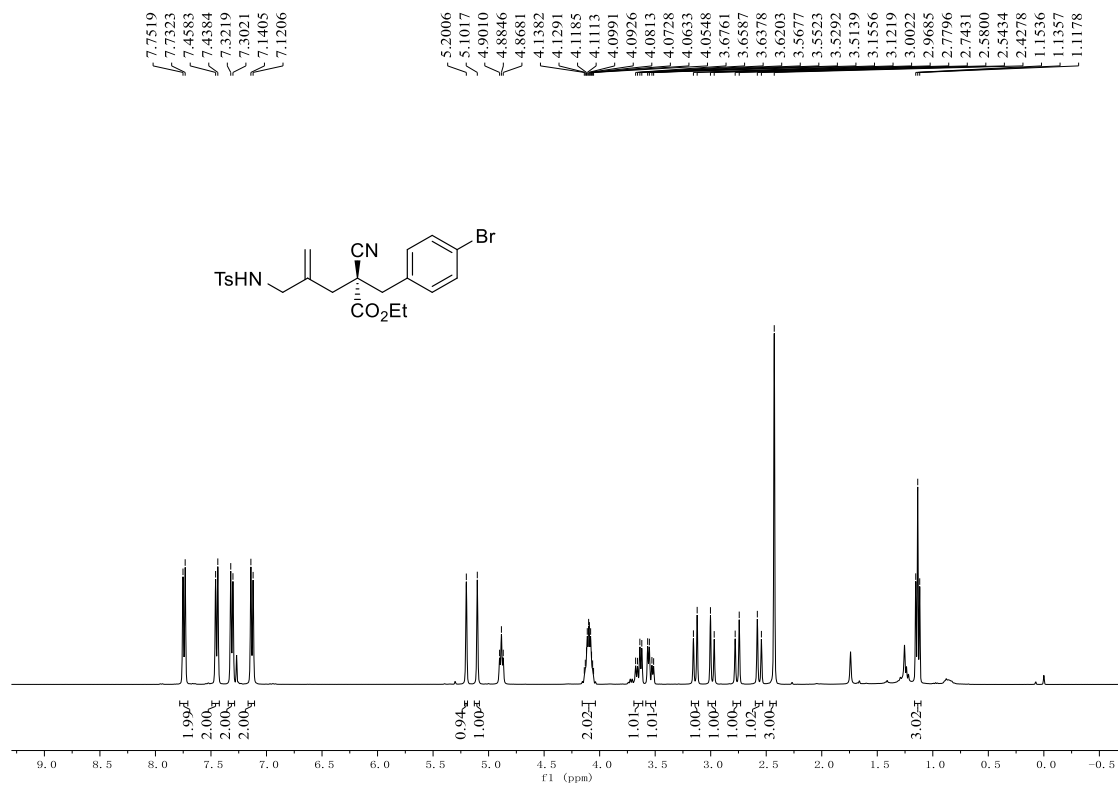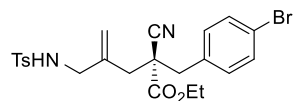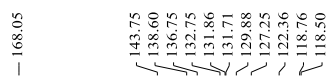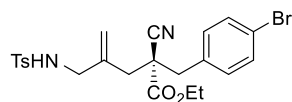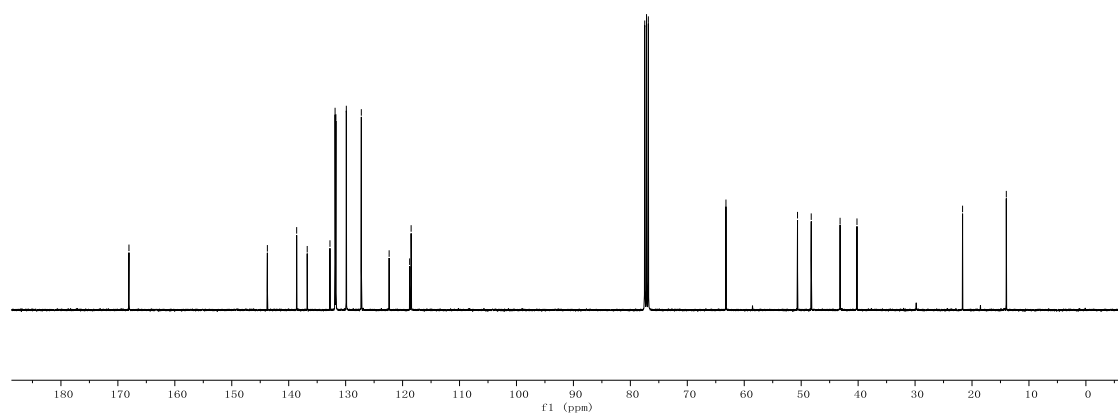

### HPLC spectra of 3i

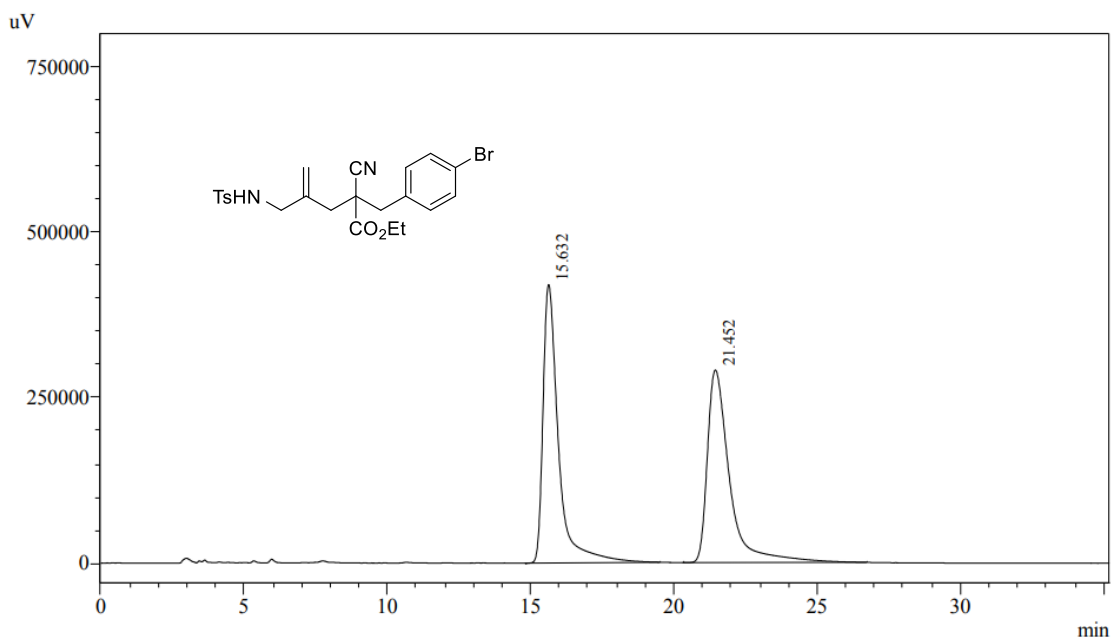

Detector A Ch1 220nm

| Peak# | Ret. Time | Area     | Height | Area %  | Height % |
|-------|-----------|----------|--------|---------|----------|
| 1     | 15.632    | 15795580 | 421147 | 50.088  | 59.116   |
| 2     | 21.452    | 15740195 | 291266 | 49.912  | 40.884   |
| Total |           | 31535775 | 712412 | 100.000 | 100.000  |

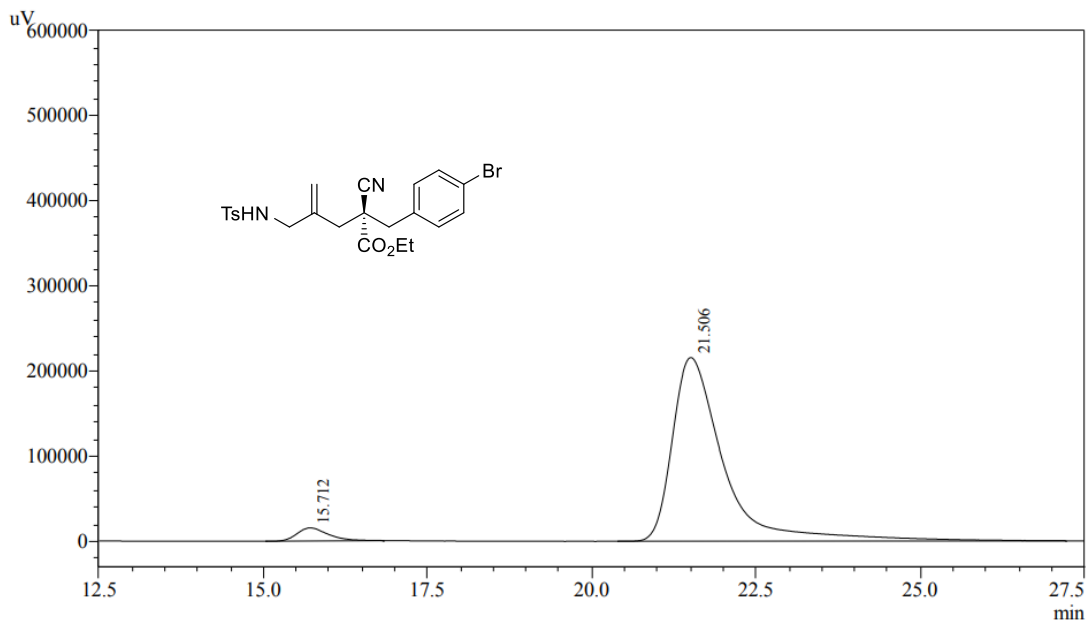

Detector A Ch1 220nm

| Peak# | Ret. Time | Area     | Height | Area %  | Height % |
|-------|-----------|----------|--------|---------|----------|
| 1     | 15.712    | 508554   | 15353  | 4.152   | 6.643    |
| 2     | 21.506    | 11740598 | 215769 | 95.848  | 93.357   |
| Total |           | 12249153 | 231122 | 100.000 | 100.000  |

**<sup>1</sup>H NMR (400 MHz, CDCl<sub>3</sub>) and <sup>13</sup>C NMR (101 MHz, CDCl<sub>3</sub>) of 3j**

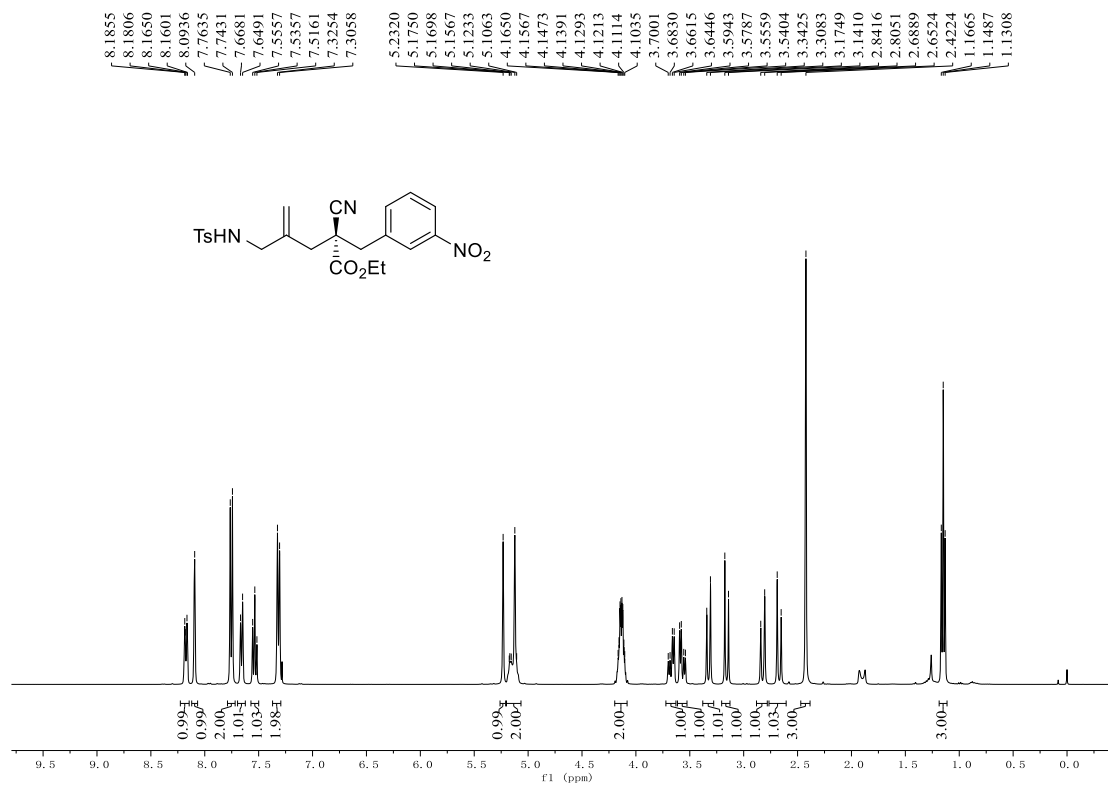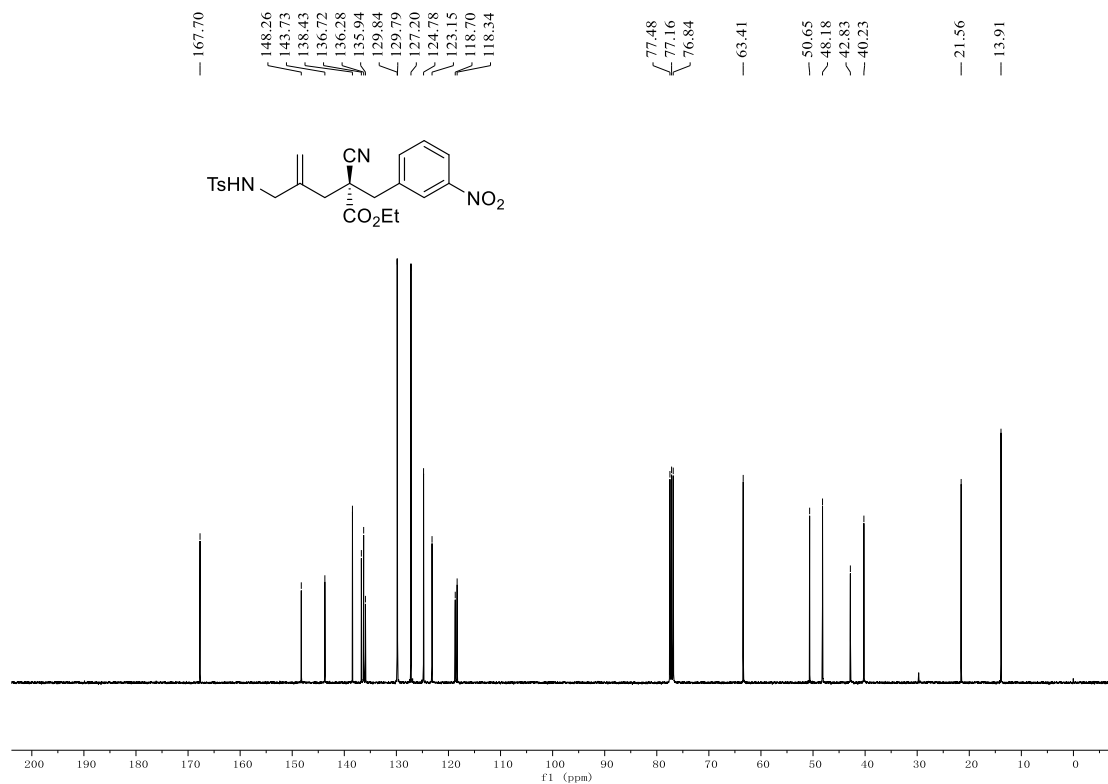

### HPLC spectra of 3j

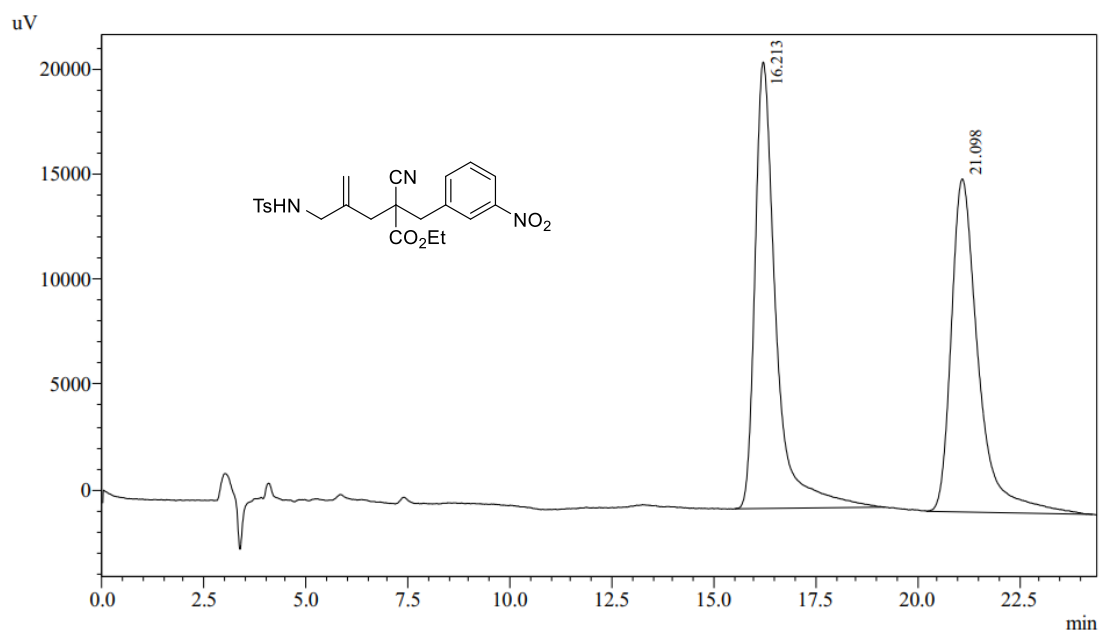

1 Det.A Ch1 / 254nm

Detector A Ch1 254nm

| Peak# | Ret. Time | Area    | Height | Area %  | Height % |
|-------|-----------|---------|--------|---------|----------|
| 1     | 16.213    | 759701  | 21212  | 50.967  | 57.279   |
| 2     | 21.098    | 730863  | 15820  | 49.033  | 42.721   |
| Total |           | 1490564 | 37032  | 100.000 | 100.000  |

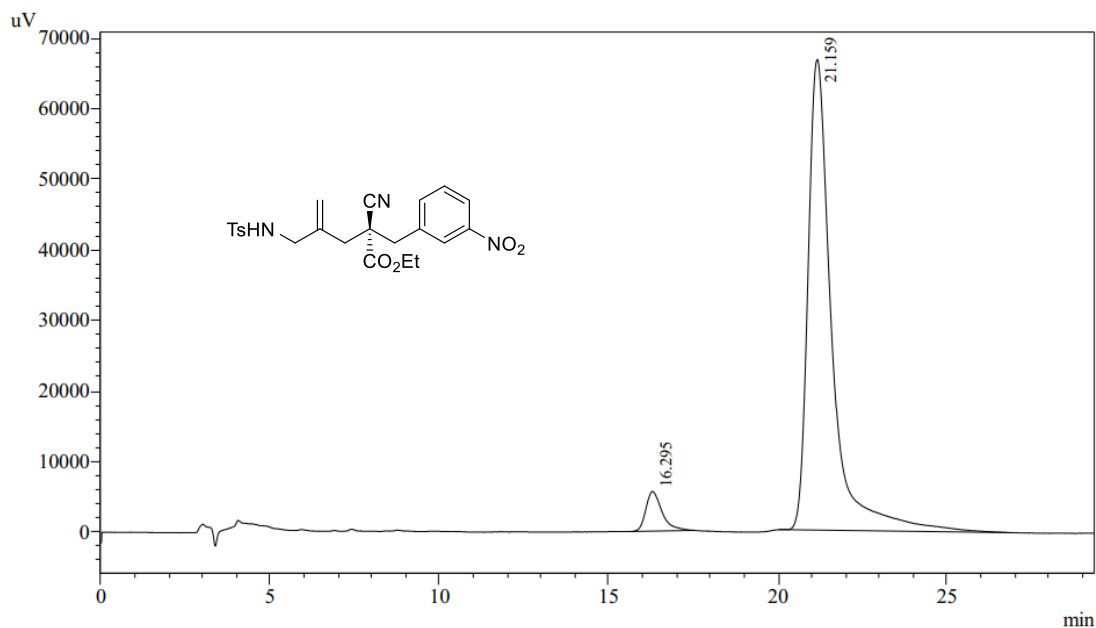

1 Det.A Ch1 / 254nm

Detector A Ch1 254nm

| Peak# | Ret. Time | Area    | Height | Area %  | Height % |
|-------|-----------|---------|--------|---------|----------|
| 1     | 16.295    | 185913  | 5612   | 5.381   | 7.763    |
| 2     | 21.159    | 3268852 | 66672  | 94.619  | 92.237   |
| Total |           | 3454765 | 72283  | 100.000 | 100.000  |

<sup>1</sup>H NMR (400 MHz, CDCl<sub>3</sub>) and <sup>13</sup>C NMR (101 MHz, CDCl<sub>3</sub>) of 3k

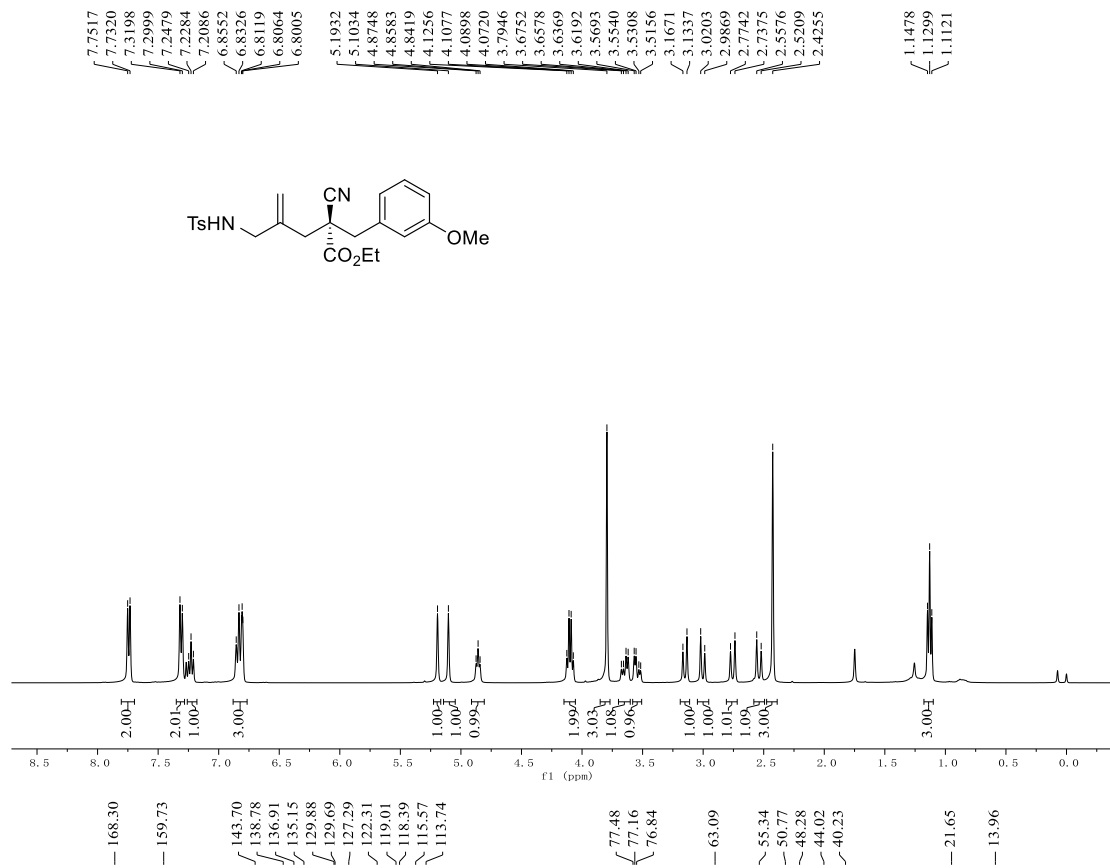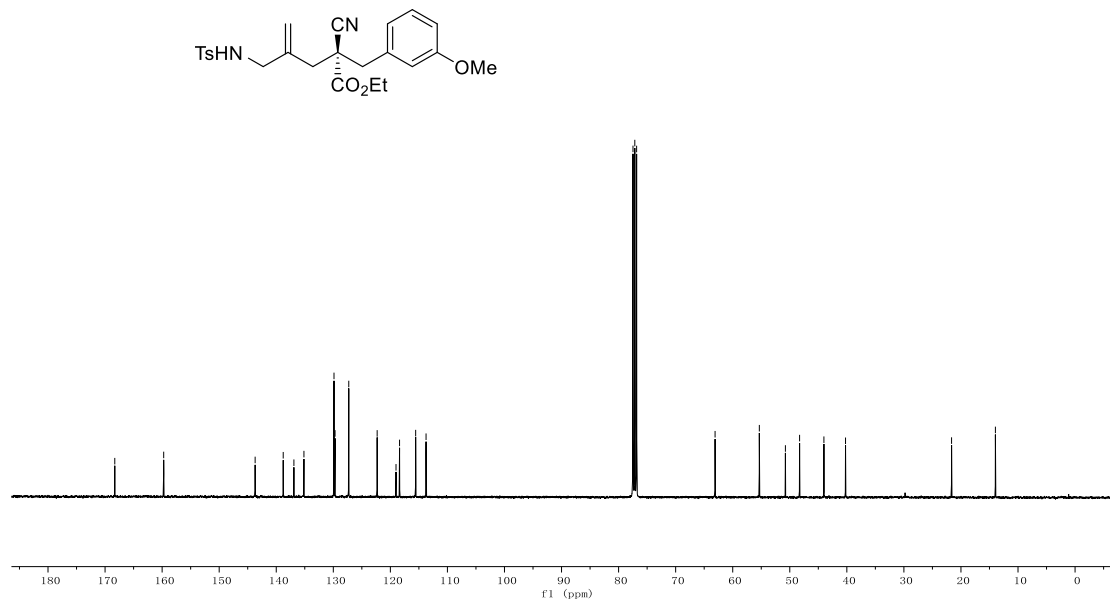



### HPLC spectra of 3k

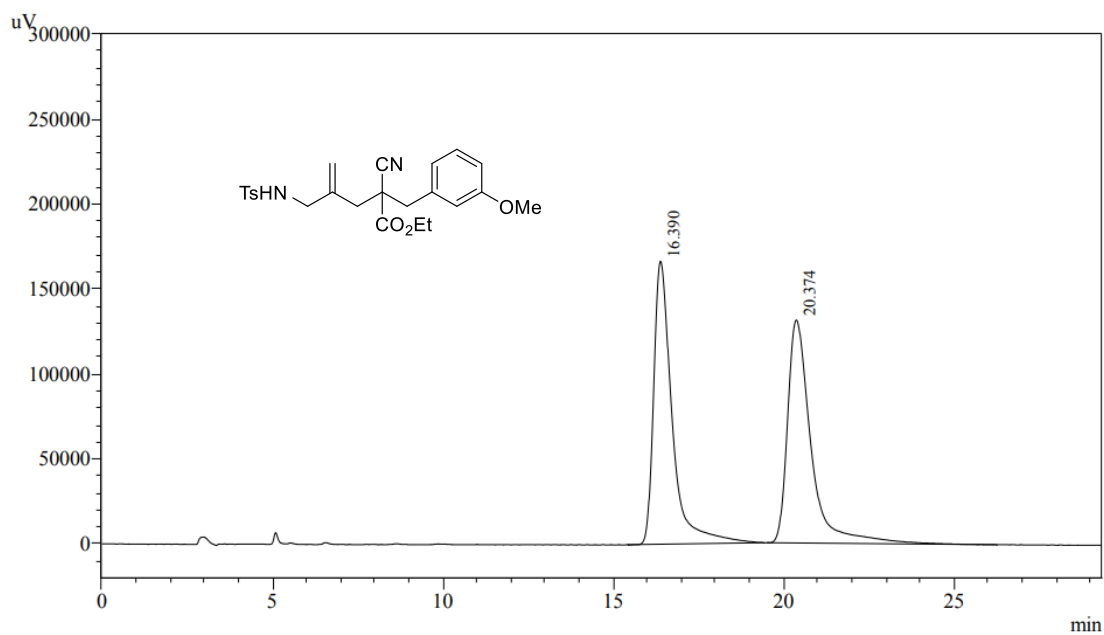

Detector A Ch1 220nm

| Peak# | Ret. Time | Area     | Height | Area %  | Height % |
|-------|-----------|----------|--------|---------|----------|
| 1     | 16.390    | 6271503  | 166496 | 49.871  | 55.933   |
| 2     | 20.374    | 6303917  | 131174 | 50.129  | 44.067   |
| Total |           | 12575420 | 297669 | 100.000 | 100.000  |

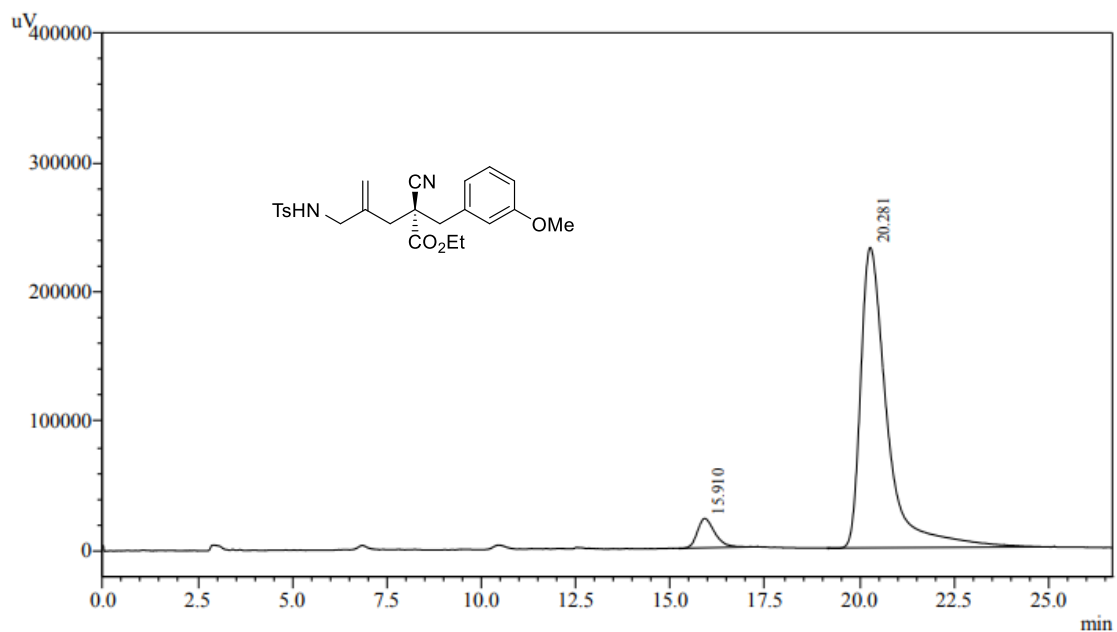

Detector A Ch1 220nm

| Peak# | Ret. Time | Area     | Height | Area %  | Height % |
|-------|-----------|----------|--------|---------|----------|
| 1     | 15.910    | 734597   | 22745  | 6.106   | 8.928    |
| 2     | 20.281    | 11297085 | 232025 | 93.894  | 91.072   |
| Total |           | 12031682 | 254770 | 100.000 | 100.000  |



### HPLC spectra of 3l

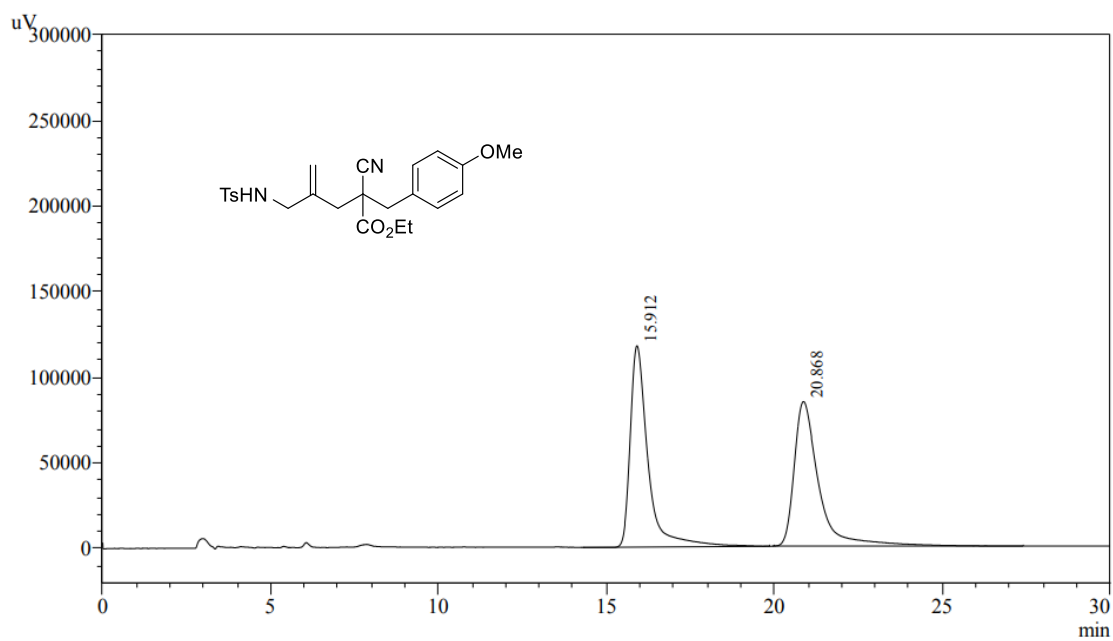

Detector A Ch1 220nm

| Peak# | Ret. Time | Area    | Height | Area %  | Height % |
|-------|-----------|---------|--------|---------|----------|
| 1     | 15.912    | 4311445 | 117516 | 50.047  | 58.200   |
| 2     | 20.868    | 4303385 | 84403  | 49.953  | 41.800   |
| Total |           | 8614830 | 201918 | 100.000 | 100.000  |

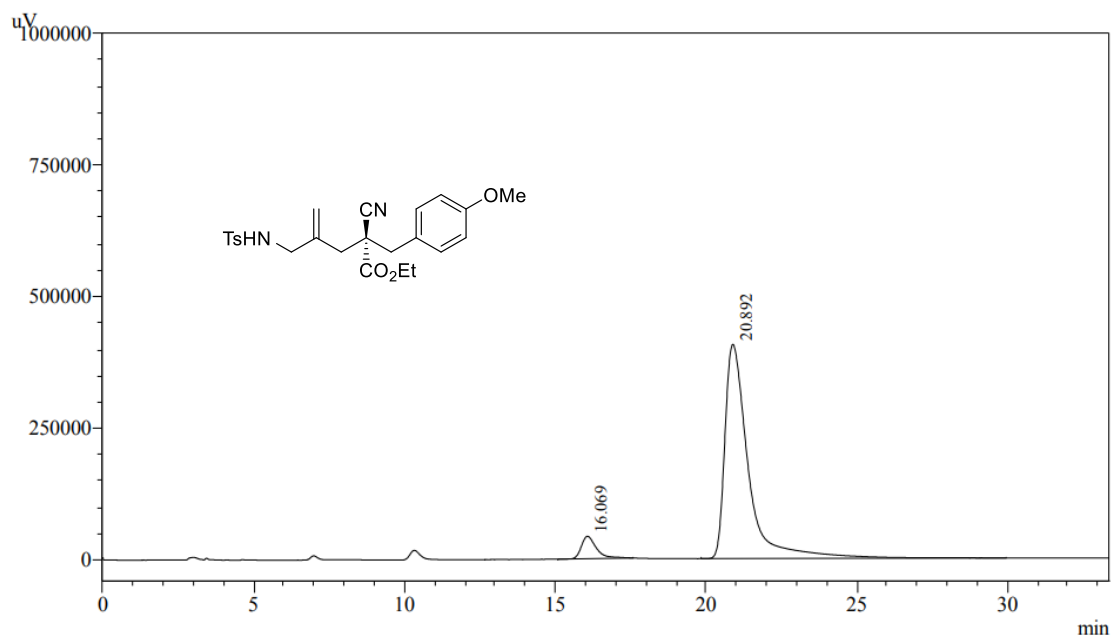

Detector A Ch1 220nm

| Peak# | Ret. Time | Area     | Height | Area %  | Height % |
|-------|-----------|----------|--------|---------|----------|
| 1     | 16.069    | 1472187  | 42669  | 6.220   | 9.489    |
| 2     | 20.892    | 22196615 | 406985 | 93.780  | 90.511   |
| Total |           | 23668803 | 449655 | 100.000 | 100.000  |

**<sup>1</sup>H NMR (400 MHz, CDCl<sub>3</sub>) and <sup>13</sup>C NMR (101 MHz, CDCl<sub>3</sub>) of 3m**

<sup>1</sup>H NMR (400 MHz, CDCl<sub>3</sub>) peaks (ppm): 7.7510, 7.7312, 7.3145, 7.2947, 7.2227, 7.2042, 7.1899, 7.1795, 7.1567, 5.1968, 5.1106, 4.8669, 4.8506, 4.8342, 4.1390, 4.1211, 4.1033, 4.0854, 3.6855, 3.6679, 3.6472, 3.6296, 3.5671, 3.5519, 3.5288, 3.5137, 3.2350, 3.2000, 3.1812, 3.1461, 2.8351, 2.7986, 2.5937, 2.5572, 2.4222, 2.3716, 1.1444, 1.1266, 1.1086.

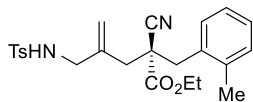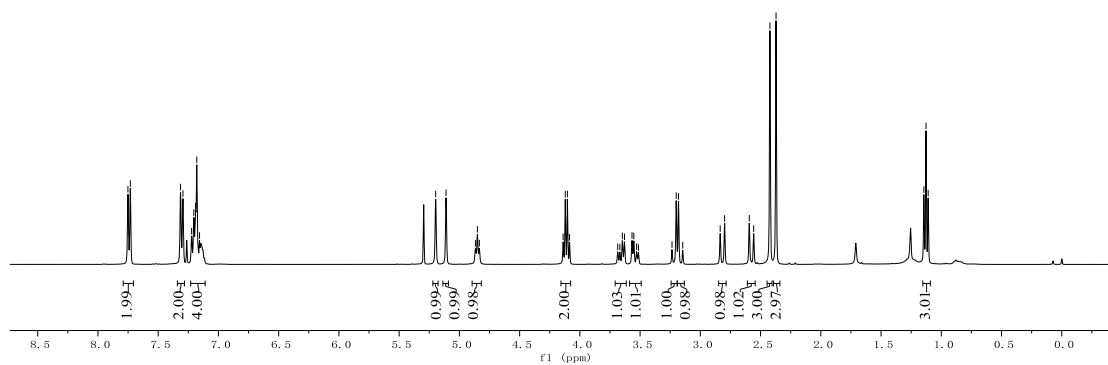

<sup>13</sup>C NMR (101 MHz, CDCl<sub>3</sub>) peaks (ppm): 168.68, 143.68, 138.79, 137.31, 136.89, 132.33, 131.07, 130.19, 129.86, 128.06, 127.26, 126.16, 119.19, 118.42, 77.48, 77.16, 76.84, 63.15, 50.14, 48.31, 40.36, 40.09, 21.65, 20.00, 13.91.

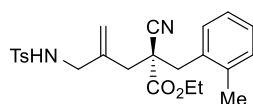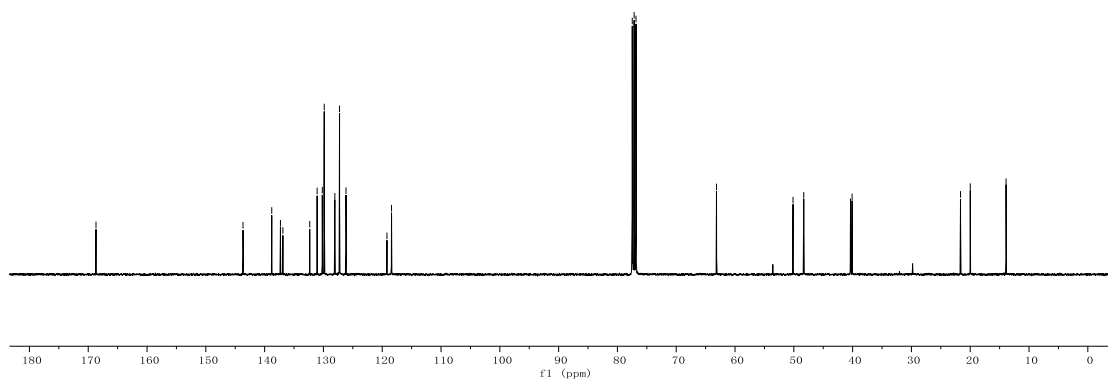

### HPLC spectra of 3m

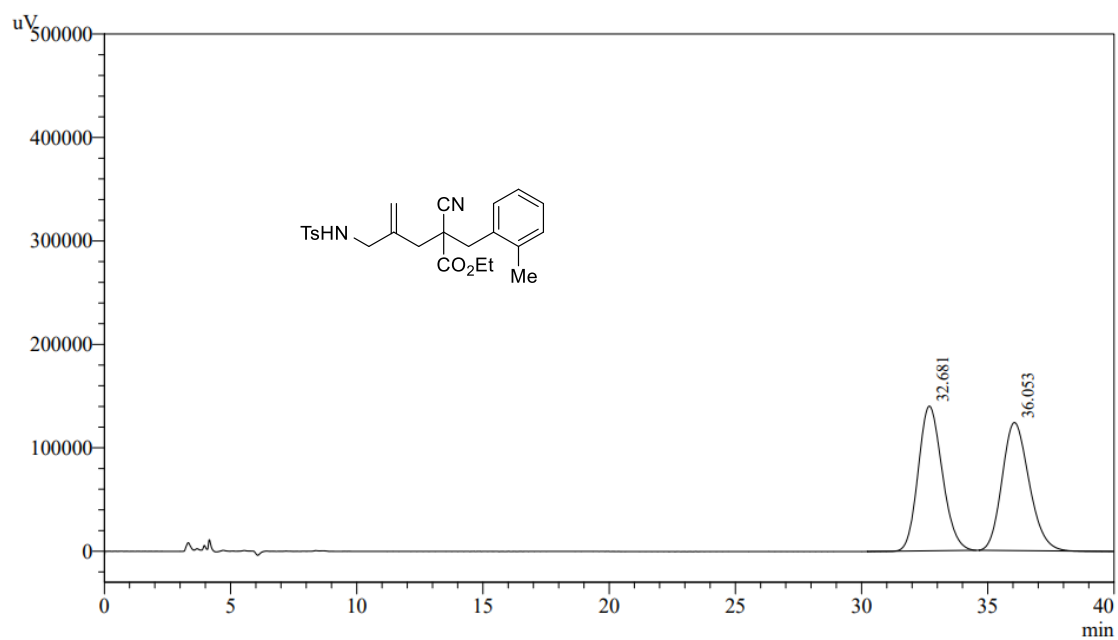

Detector A Ch1 220nm

| Peak# | Ret. Time | Area     | Height | Area %  | Height % |
|-------|-----------|----------|--------|---------|----------|
| 1     | 32.681    | 9271417  | 139919 | 50.108  | 53.069   |
| 2     | 36.053    | 9231593  | 123737 | 49.892  | 46.931   |
| Total |           | 18503010 | 263655 | 100.000 | 100.000  |

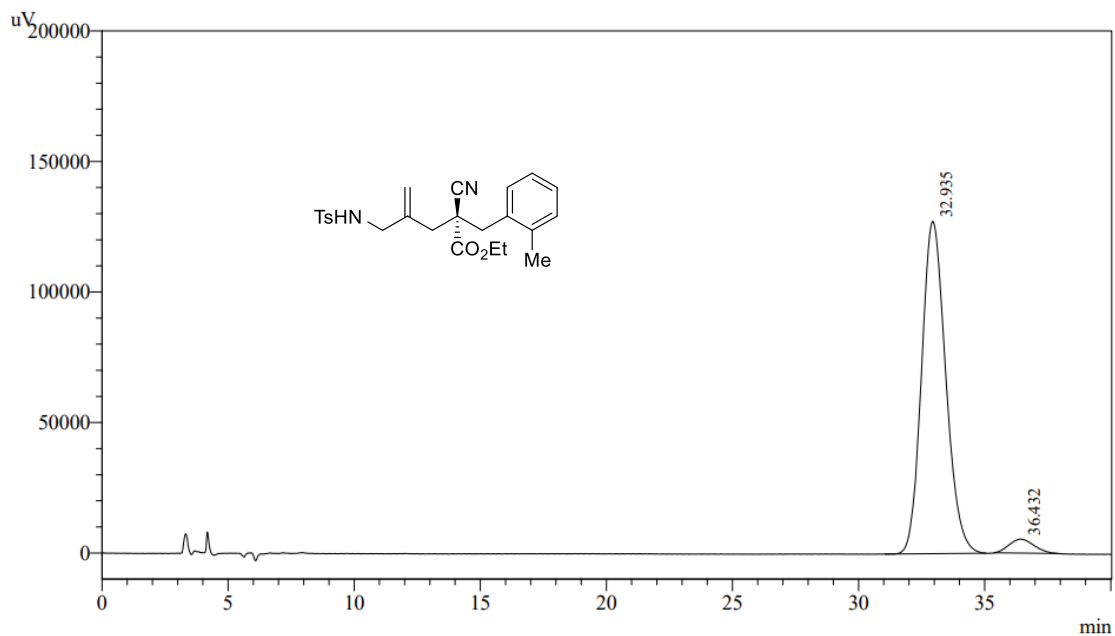

Detector A Ch1 220nm

| Peak# | Ret. Time | Area    | Height | Area %  | Height % |
|-------|-----------|---------|--------|---------|----------|
| 1     | 32.935    | 8472304 | 127283 | 95.843  | 95.959   |
| 2     | 36.432    | 367426  | 5360   | 4.157   | 4.041    |
| Total |           | 8839730 | 132643 | 100.000 | 100.000  |

**<sup>1</sup>H NMR (400 MHz, CDCl<sub>3</sub>) and <sup>13</sup>C NMR (101 MHz, CDCl<sub>3</sub>) of 3n**

<sup>1</sup>H NMR (400 MHz, CDCl<sub>3</sub>) peaks (ppm): 7.7542, 7.7345, 7.5183, 7.2985, 7.2230, 7.2038, 7.1847, 7.1199, 7.1007, 7.0469, 7.0306, 5.1891, 5.1027, 4.8726, 4.8398, 4.1152, 4.0971, 4.0793, 4.0615, 3.6707, 3.6533, 3.6324, 3.6149, 3.5676, 3.5522, 3.5291, 3.5139, 3.1487, 3.1152, 3.0037, 2.9702, 2.7786, 2.7418, 2.5507, 2.5140, 2.4237, 2.3291, 1.1345, 1.1167, 1.1152, 1.0975

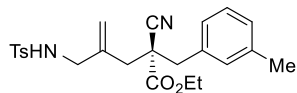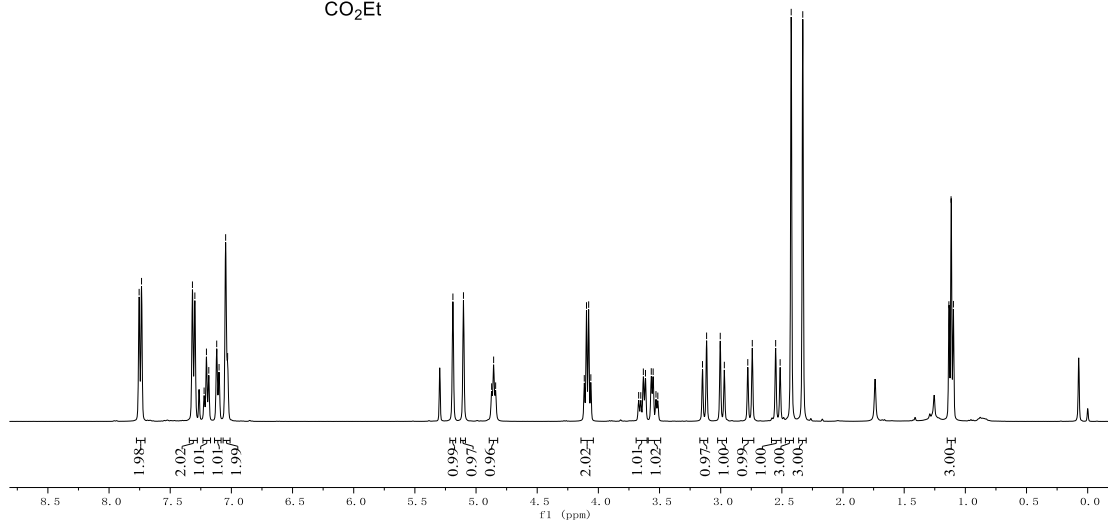

<sup>13</sup>C NMR (101 MHz, CDCl<sub>3</sub>) peaks (ppm): 168.35, 143.66, 138.80, 138.28, 136.91, 133.62, 130.74, 129.85, 128.85, 128.56, 127.27, 127.04, 118.96, 118.26, 77.48, 77.16, 76.84, 63.00, 50.84, 48.26, 43.96, 40.20, 21.63, 21.44, 13.93

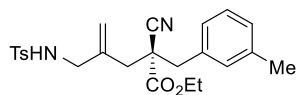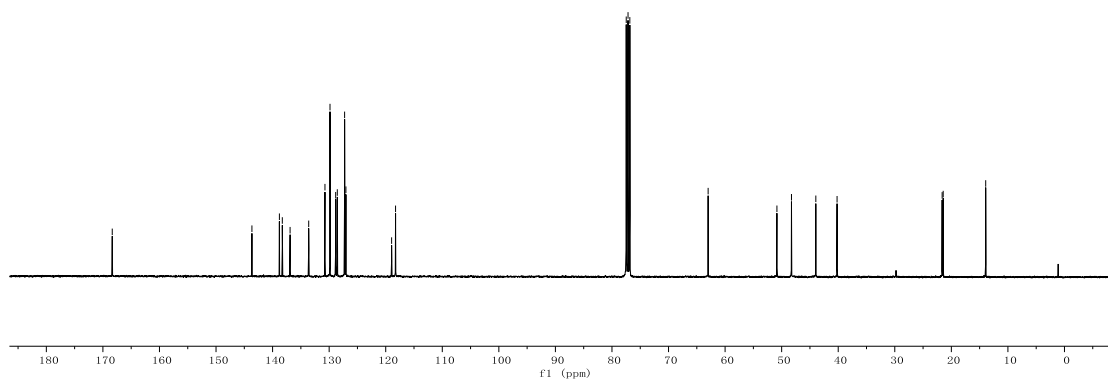

### HPLC spectra of 3n

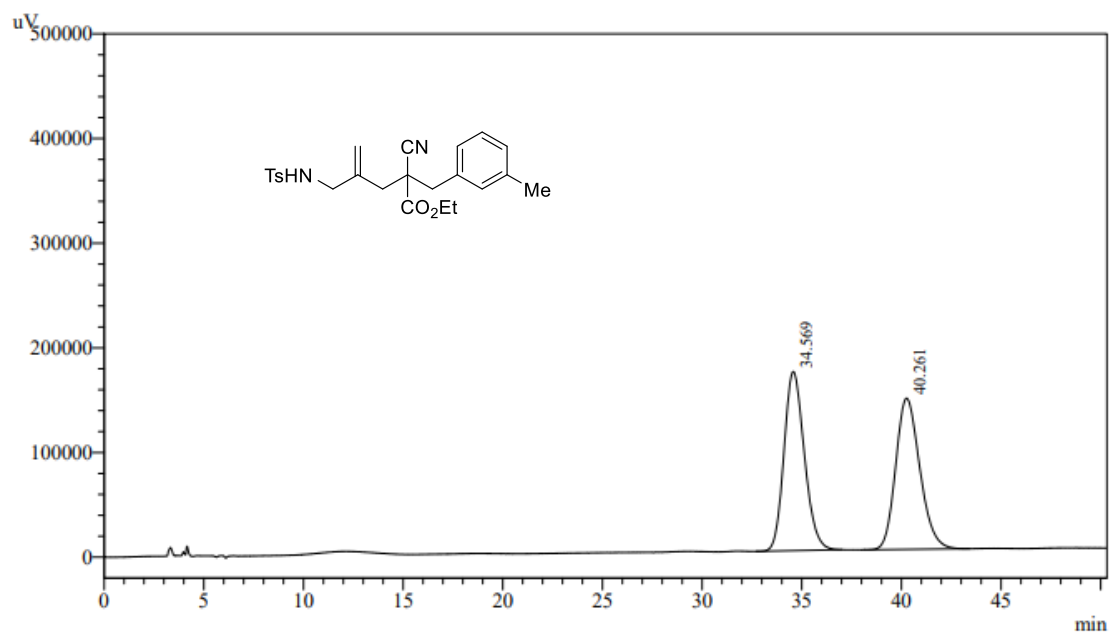

1 Det.A Ch1 / 220nm

Detector A Ch1 220nm

| Peak# | Ret. Time | Area     | Height | Area %  | Height % |
|-------|-----------|----------|--------|---------|----------|
| 1     | 34.569    | 12162241 | 171079 | 49.948  | 54.227   |
| 2     | 40.261    | 12187729 | 144409 | 50.052  | 45.773   |
| Total |           | 24349971 | 315488 | 100.000 | 100.000  |

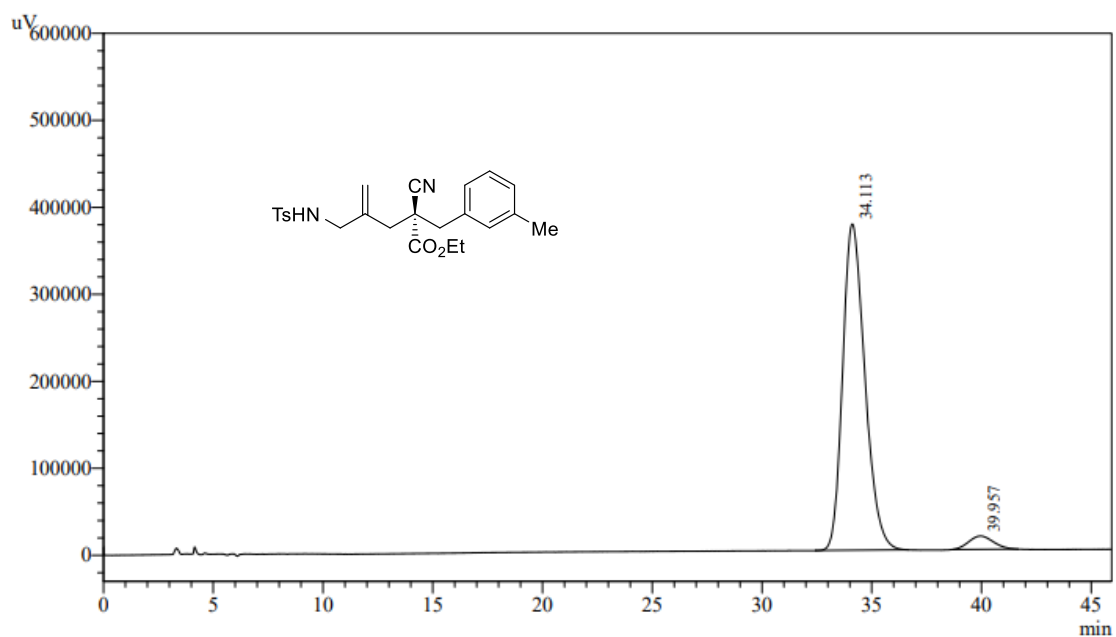

1 Det.A Ch1 / 220nm

Detector A Ch1 220nm

| Peak# | Ret. Time | Area     | Height | Area %  | Height % |
|-------|-----------|----------|--------|---------|----------|
| 1     | 34.113    | 26363635 | 375058 | 95.711  | 96.096   |
| 2     | 39.957    | 1181375  | 15236  | 4.289   | 3.904    |
| Total |           | 27545010 | 390294 | 100.000 | 100.000  |

**<sup>1</sup>H NMR (400 MHz, CDCl<sub>3</sub>) and <sup>13</sup>C NMR (101 MHz, CDCl<sub>3</sub>) of 3o**

7.7469  
7.7273  
7.3105  
7.2907  
7.1165

5.1784  
5.0904  
4.9080  
4.8916  
4.8752  
4.1160  
4.1082  
4.0976  
4.0901  
4.0797  
4.0725  
4.0613  
4.0541  
3.6602  
3.6429  
3.6219  
3.6044  
3.5587  
3.5433  
3.5201  
3.5049  
3.1494  
3.1158  
2.9958  
2.9621  
2.7555  
2.7188  
2.5242  
2.4974  
2.4177  
2.3202  
1.1398  
1.1219  
1.1039

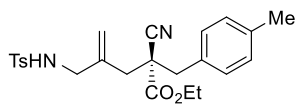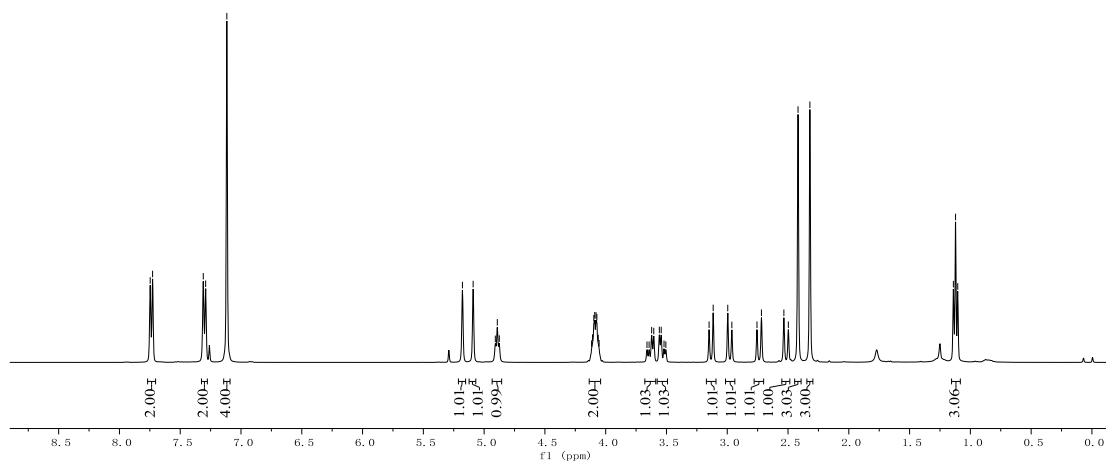

168.36  
143.66  
138.81  
137.83  
136.91  
130.63  
129.89  
129.85  
129.37  
127.27  
119.02  
118.24

77.48  
77.16  
76.84  
63.01  
50.95  
48.25  
43.65  
40.13  
21.63  
21.21  
13.94

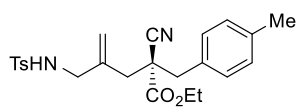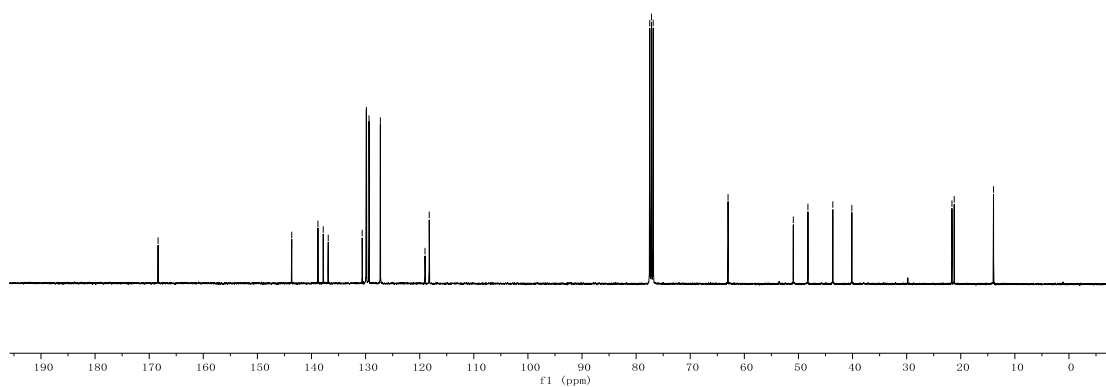



### HPLC spectra of 3o

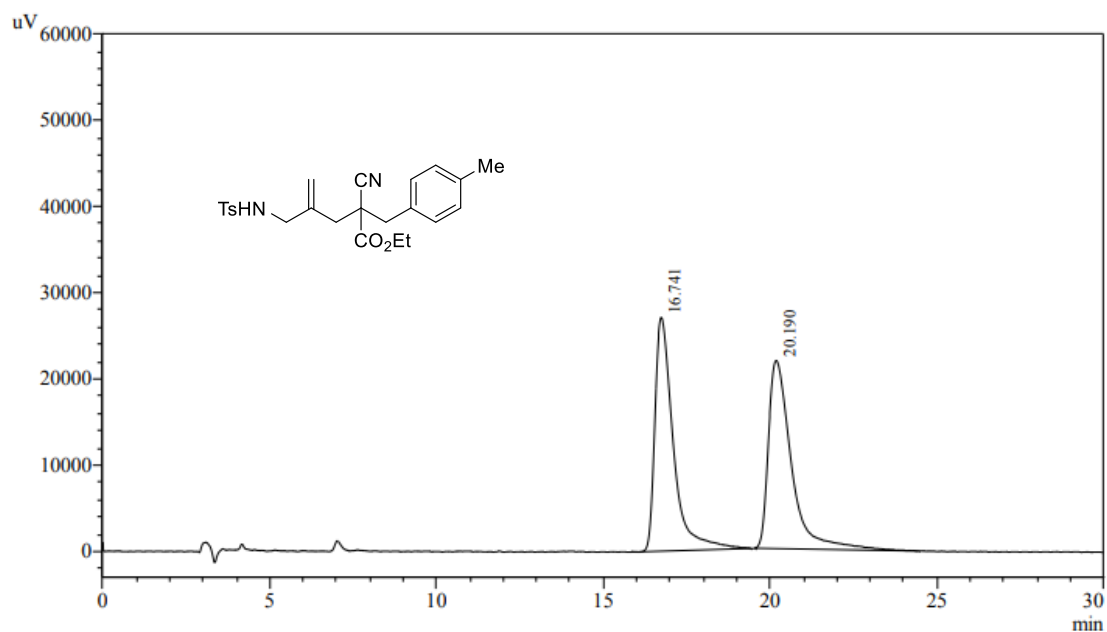

Detector A Ch1 254nm

| Peak# | Ret. Time | Area    | Height | Area %  | Height % |
|-------|-----------|---------|--------|---------|----------|
| 1     | 16.741    | 1045289 | 27108  | 49.844  | 55.420   |
| 2     | 20.190    | 1051847 | 21806  | 50.156  | 44.580   |
| Total |           | 2097136 | 48914  | 100.000 | 100.000  |

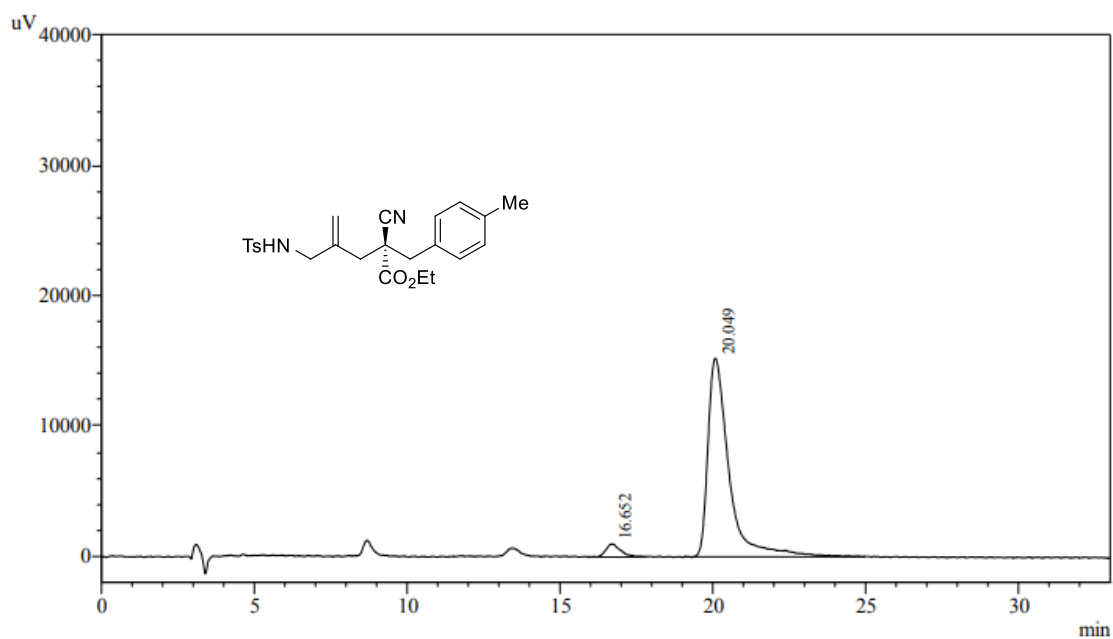

Detector A Ch1 254nm

| Peak# | Ret. Time | Area   | Height | Area %  | Height % |
|-------|-----------|--------|--------|---------|----------|
| 1     | 16.652    | 34692  | 1012   | 4.527   | 6.232    |
| 2     | 20.049    | 731572 | 15224  | 95.473  | 93.768   |
| Total |           | 766264 | 16236  | 100.000 | 100.000  |

**<sup>1</sup>H NMR (400 MHz, CDCl<sub>3</sub>) and <sup>13</sup>C NMR (101 MHz, CDCl<sub>3</sub>) of 3p**

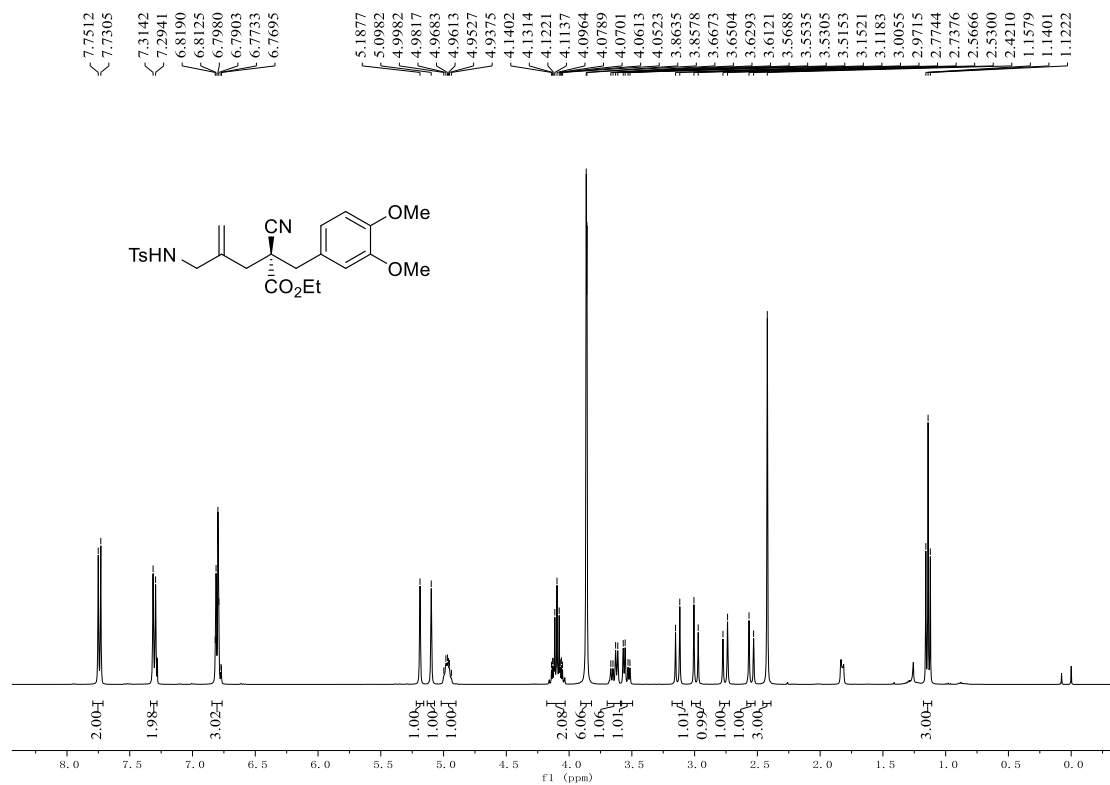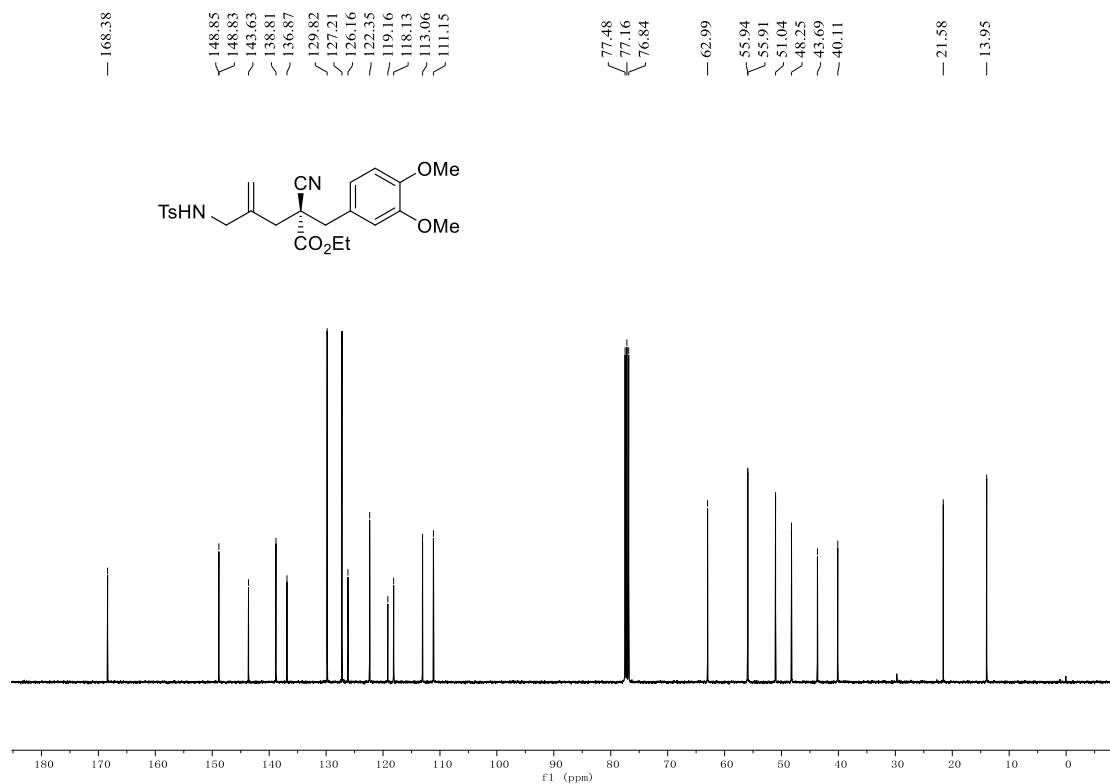

### HPLC spectra of 3p

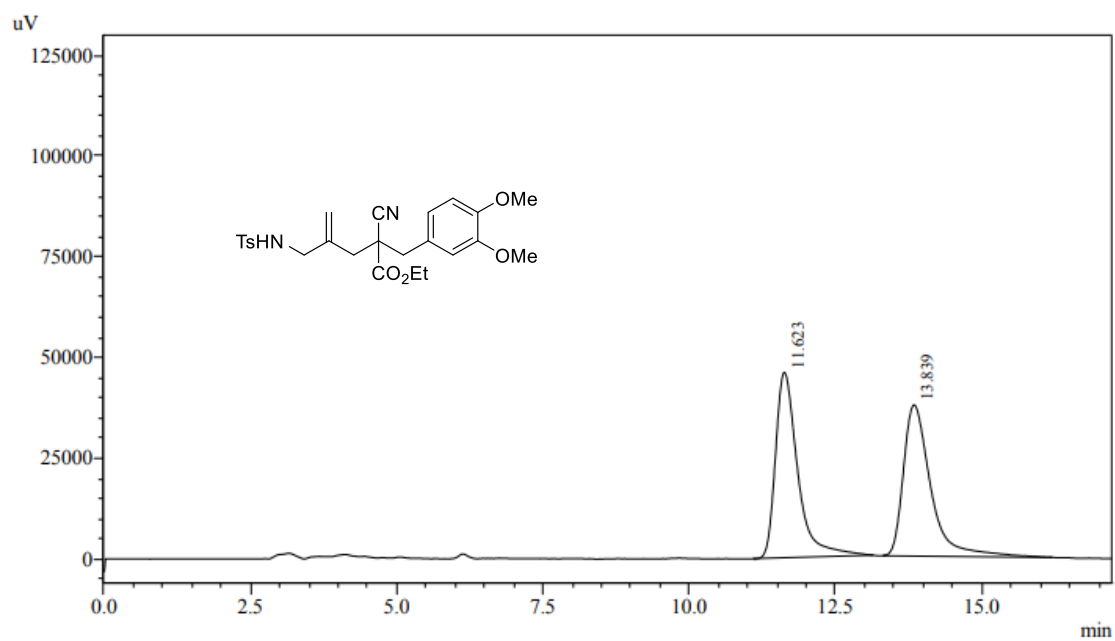

1 Det.A Ch1 / 254nm

Detector A Ch1 254nm

| Peak# | Ret. Time | Area    | Height | Area %  | Height % |
|-------|-----------|---------|--------|---------|----------|
| 1     | 11.623    | 1221089 | 46049  | 49.863  | 55.066   |
| 2     | 13.839    | 1227813 | 37577  | 50.137  | 44.934   |
| Total |           | 2448902 | 83627  | 100.000 | 100.000  |

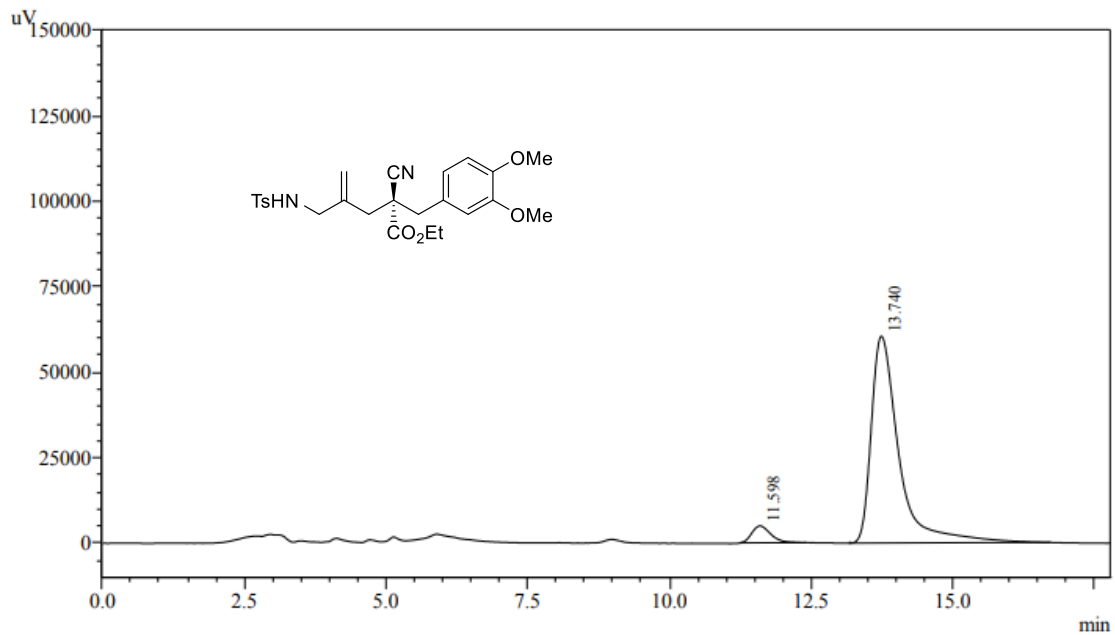

1 Det.A Ch1 / 254nm

Detector A Ch1 254nm

| Peak# | Ret. Time | Area    | Height | Area %  | Height % |
|-------|-----------|---------|--------|---------|----------|
| 1     | 11.598    | 115301  | 4984   | 5.314   | 7.617    |
| 2     | 13.740    | 2054549 | 60443  | 94.686  | 92.383   |
| Total |           | 2169850 | 65427  | 100.000 | 100.000  |

<sup>1</sup>H NMR (400 MHz, CDCl<sub>3</sub>) and <sup>13</sup>C NMR (101 MHz, CDCl<sub>3</sub>) of 3q

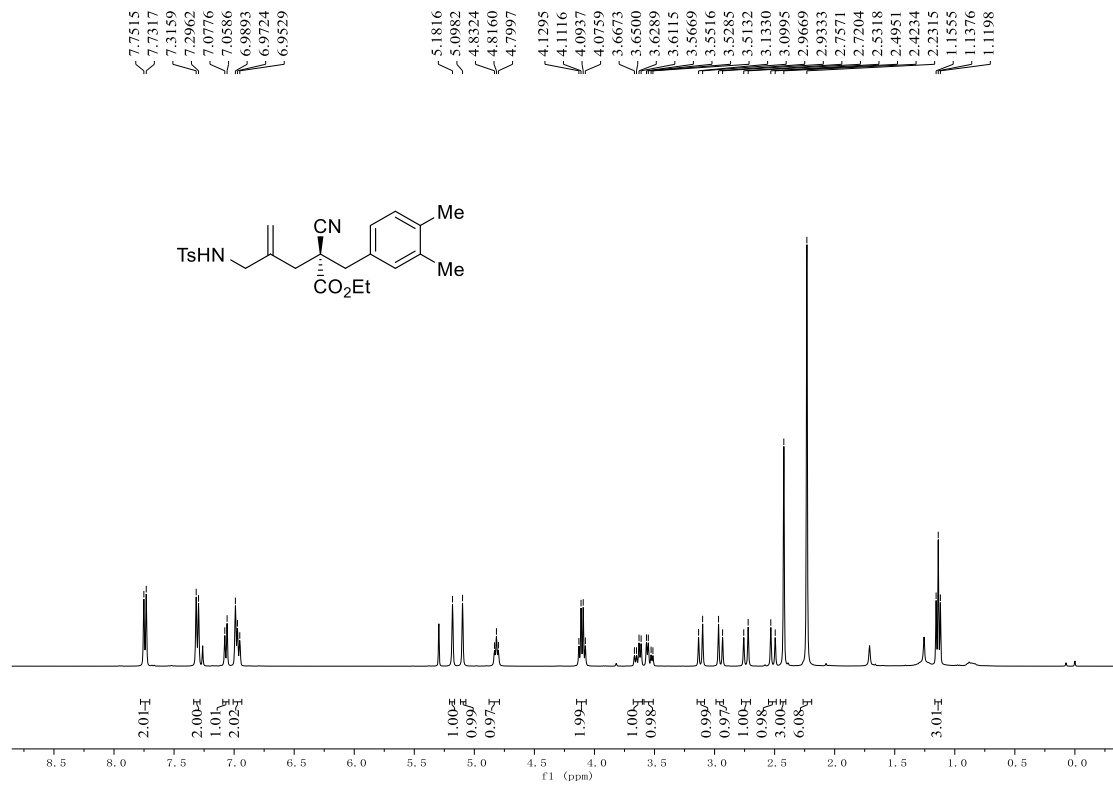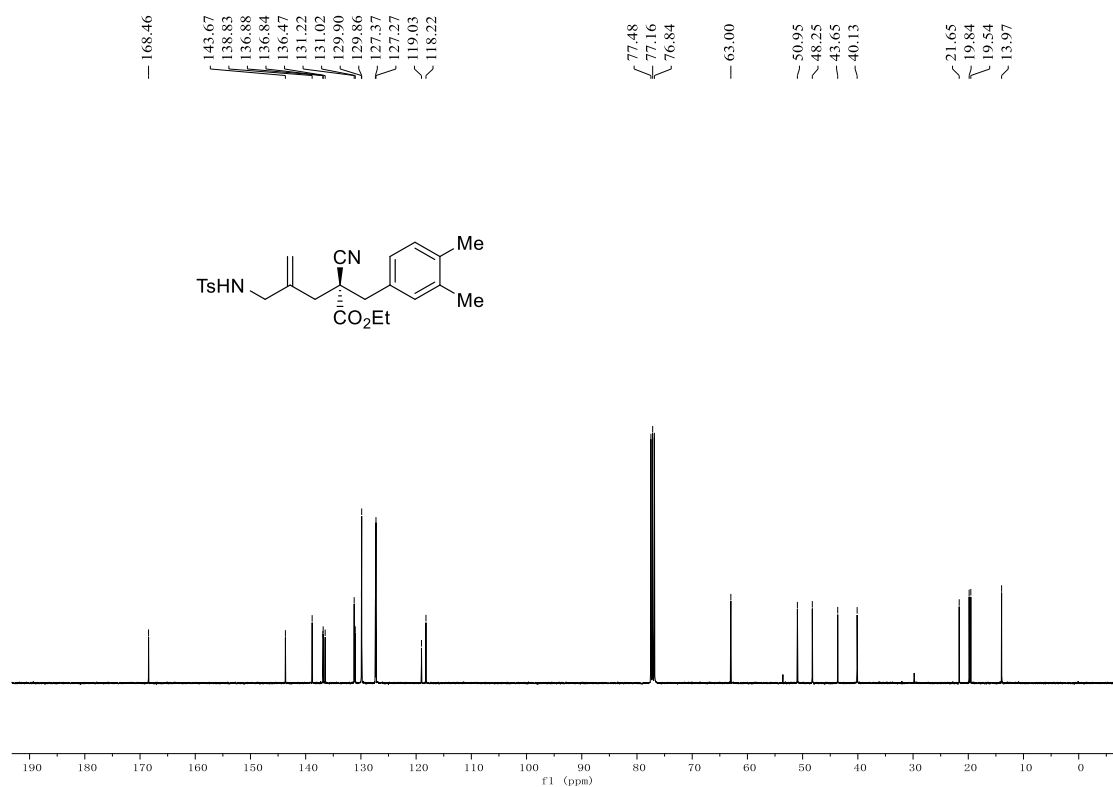

### HPLC spectra of 3q

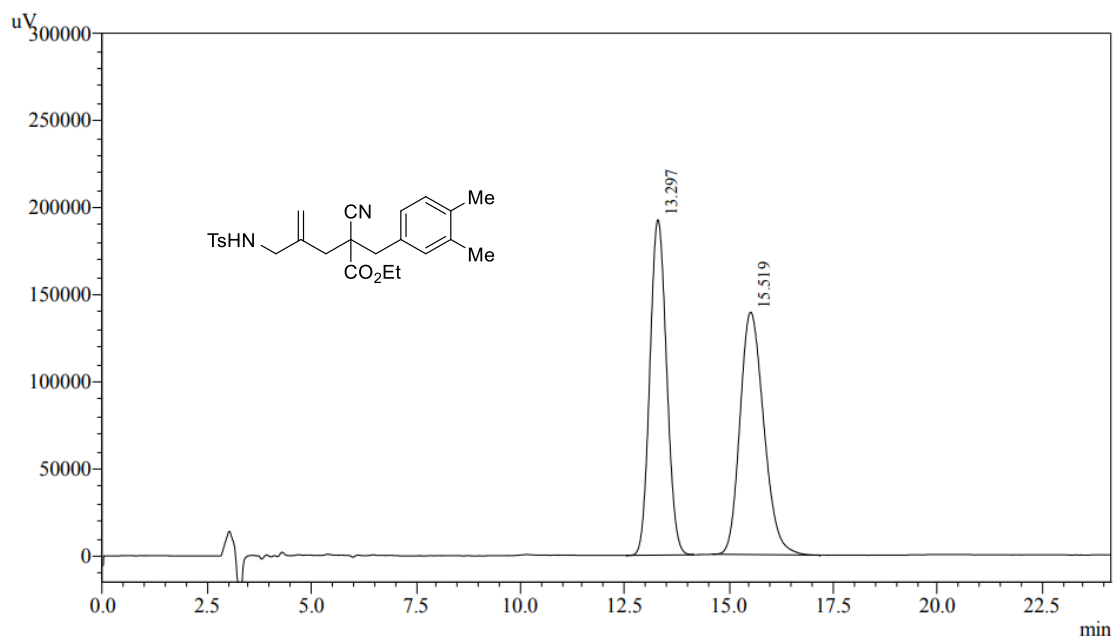

Detector A Ch1 220nm

| Peak# | Ret. Time | Area     | Height | Area %  | Height % |
|-------|-----------|----------|--------|---------|----------|
| 1     | 13.297    | 5377928  | 192660 | 49.243  | 58.038   |
| 2     | 15.519    | 5543201  | 139295 | 50.757  | 41.962   |
| Total |           | 10921129 | 331955 | 100.000 | 100.000  |

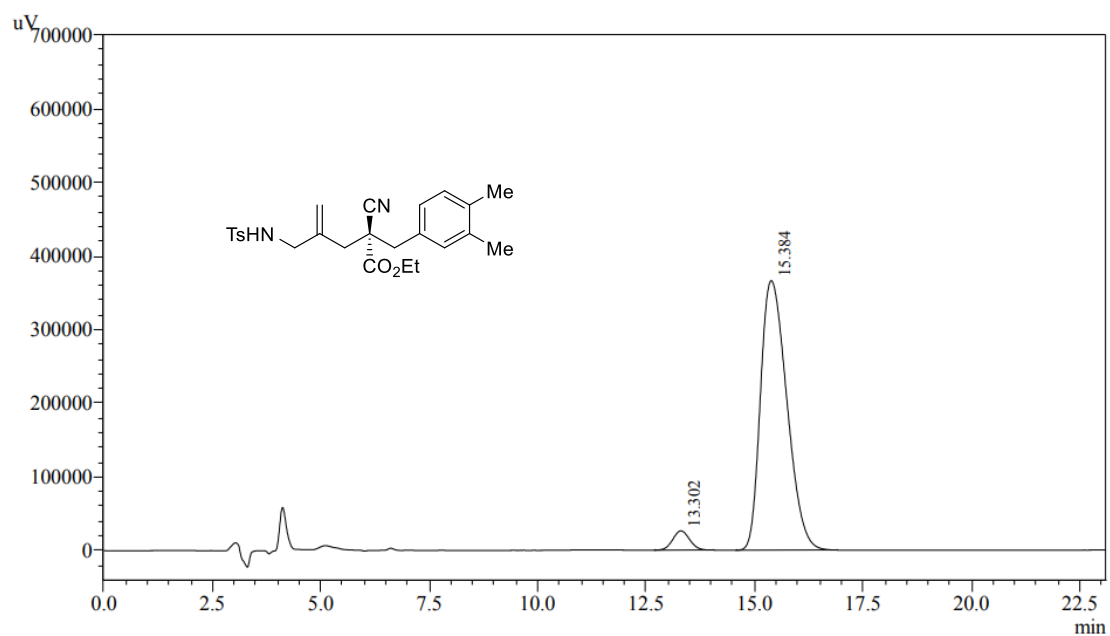

Detector A Ch1 220nm

| Peak# | Ret. Time | Area     | Height | Area %  | Height % |
|-------|-----------|----------|--------|---------|----------|
| 1     | 13.302    | 702035   | 26066  | 4.337   | 6.650    |
| 2     | 15.384    | 15486907 | 365925 | 95.663  | 93.350   |
| Total |           | 16188942 | 391991 | 100.000 | 100.000  |

<sup>1</sup>H NMR (400 MHz, CDCl<sub>3</sub>) and <sup>13</sup>C NMR (101 MHz, CDCl<sub>3</sub>) of 3r

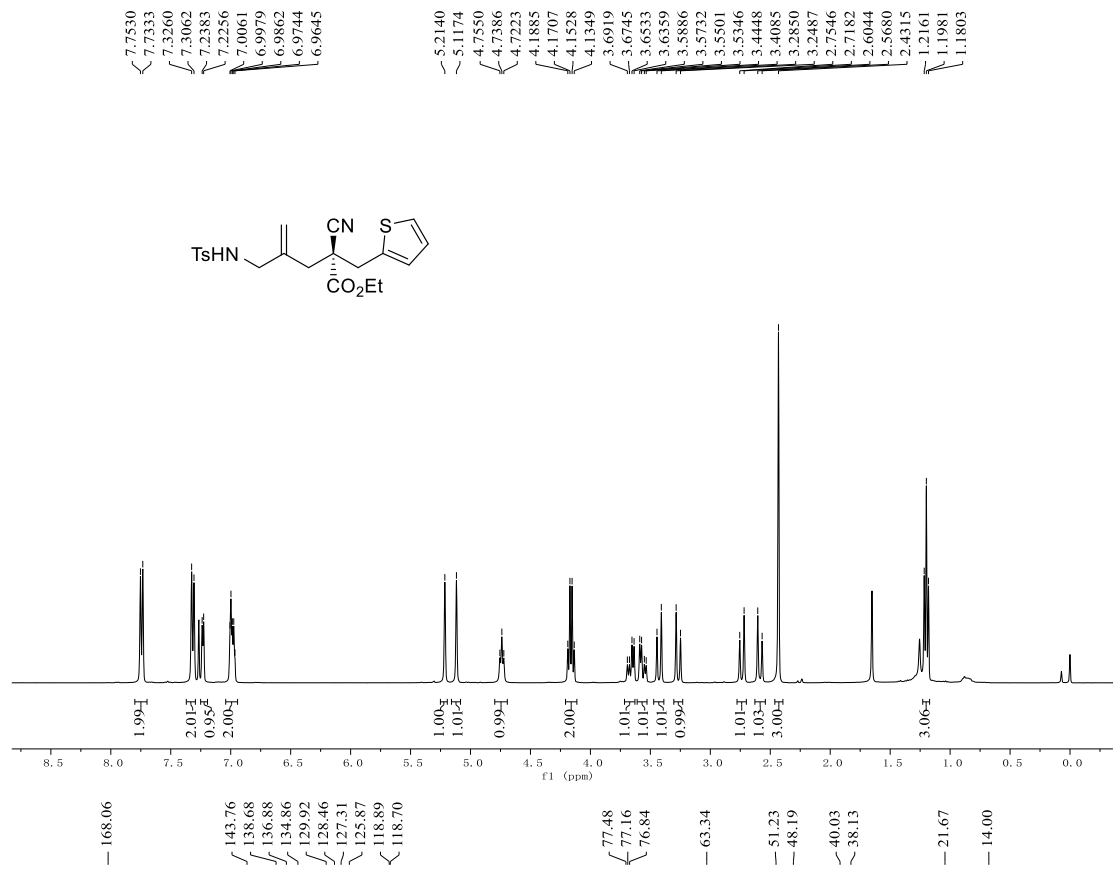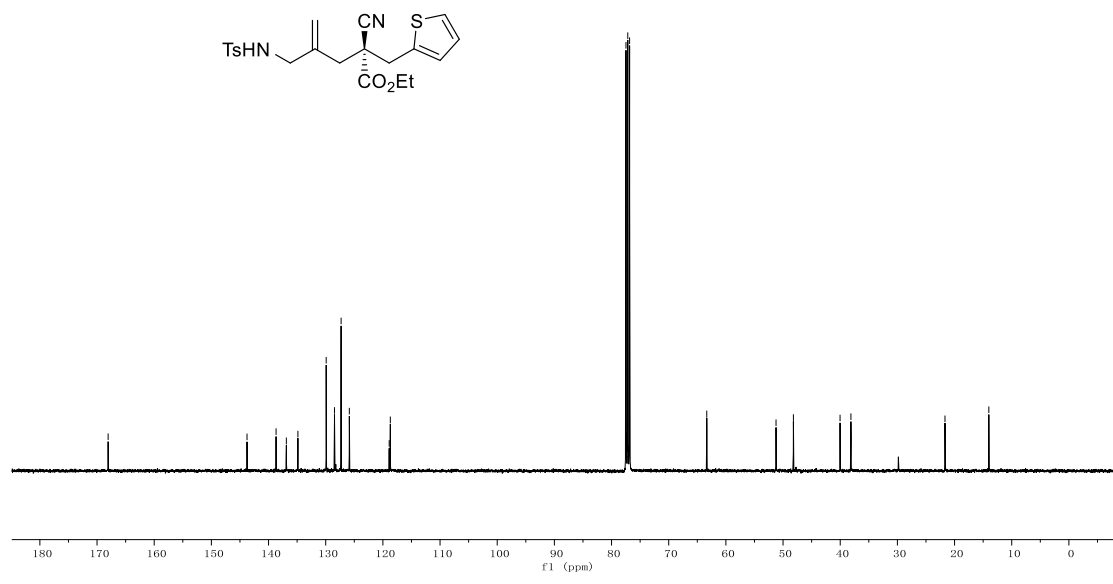

### HPLC spectra of 3r

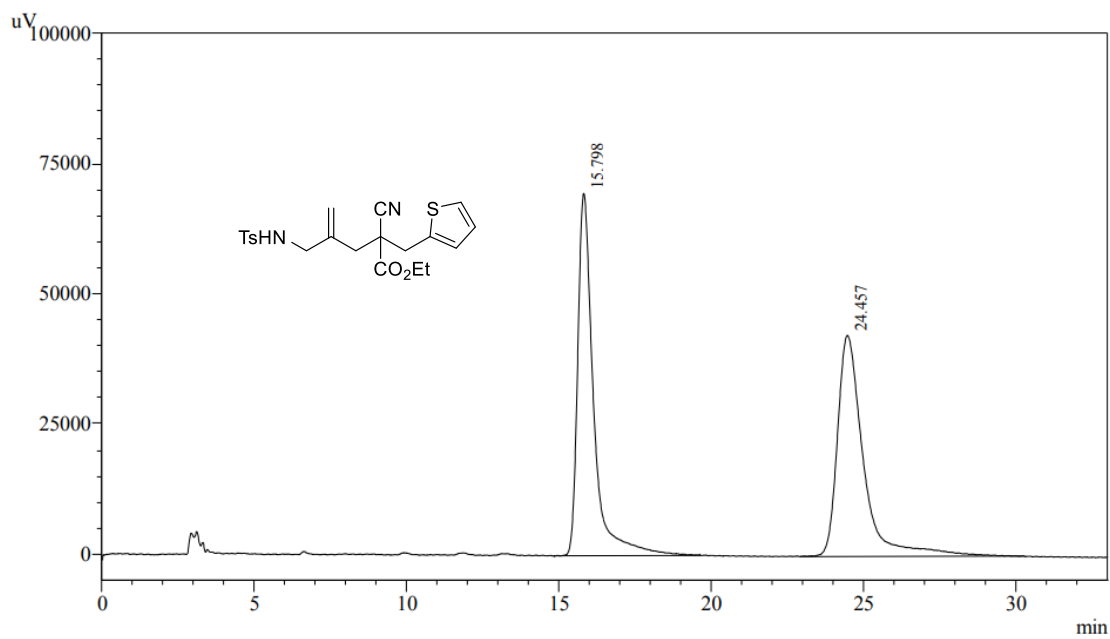

Detector A Ch1 220nm

| Peak# | Ret. Time | Area    | Height | Area %  | Height % |
|-------|-----------|---------|--------|---------|----------|
| 1     | 15.798    | 2525576 | 69600  | 49.993  | 62.110   |
| 2     | 24.457    | 2526305 | 42459  | 50.007  | 37.890   |
| Total |           | 5051881 | 112060 | 100.000 | 100.000  |

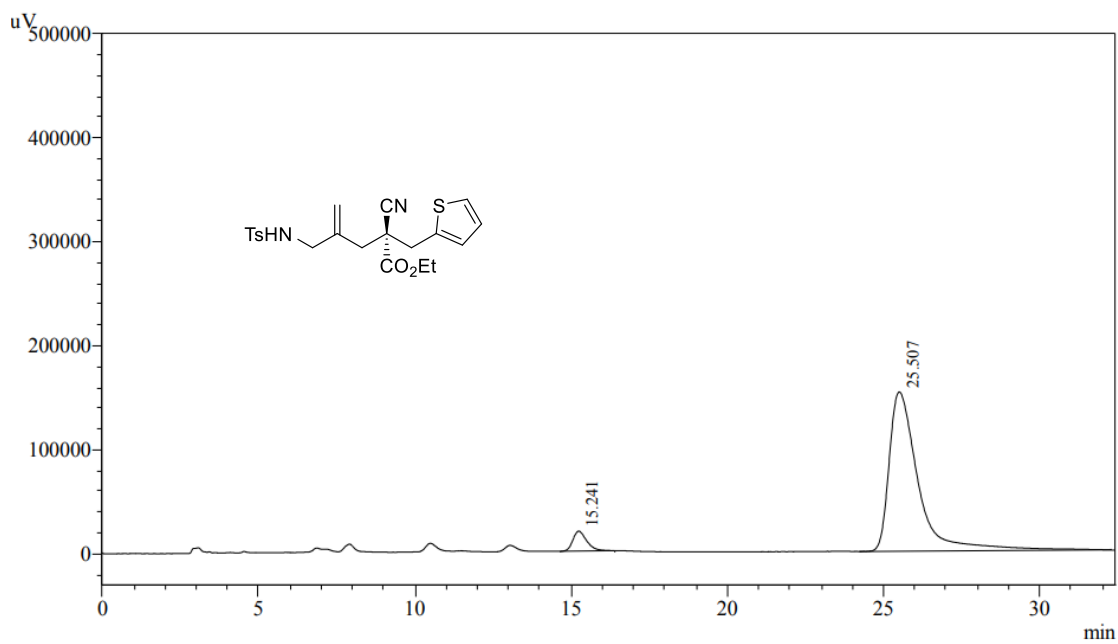

Detector A Ch1 220nm

| Peak# | Ret. Time | Area     | Height | Area %  | Height % |
|-------|-----------|----------|--------|---------|----------|
| 1     | 15.241    | 587678   | 19109  | 5.559   | 11.092   |
| 2     | 25.507    | 9984005  | 153166 | 94.441  | 88.908   |
| Total |           | 10571683 | 172275 | 100.000 | 100.000  |

<sup>1</sup>H NMR (400 MHz, CDCl<sub>3</sub>) and <sup>13</sup>C NMR (101 MHz, CDCl<sub>3</sub>) of 3s

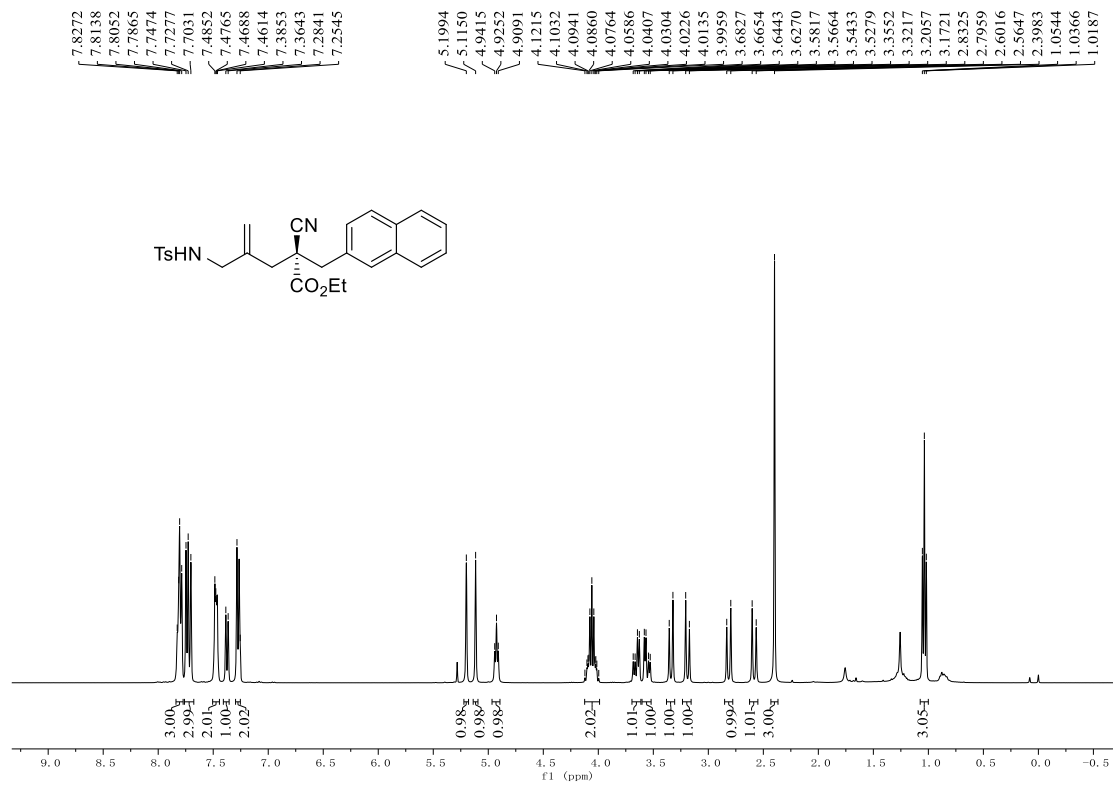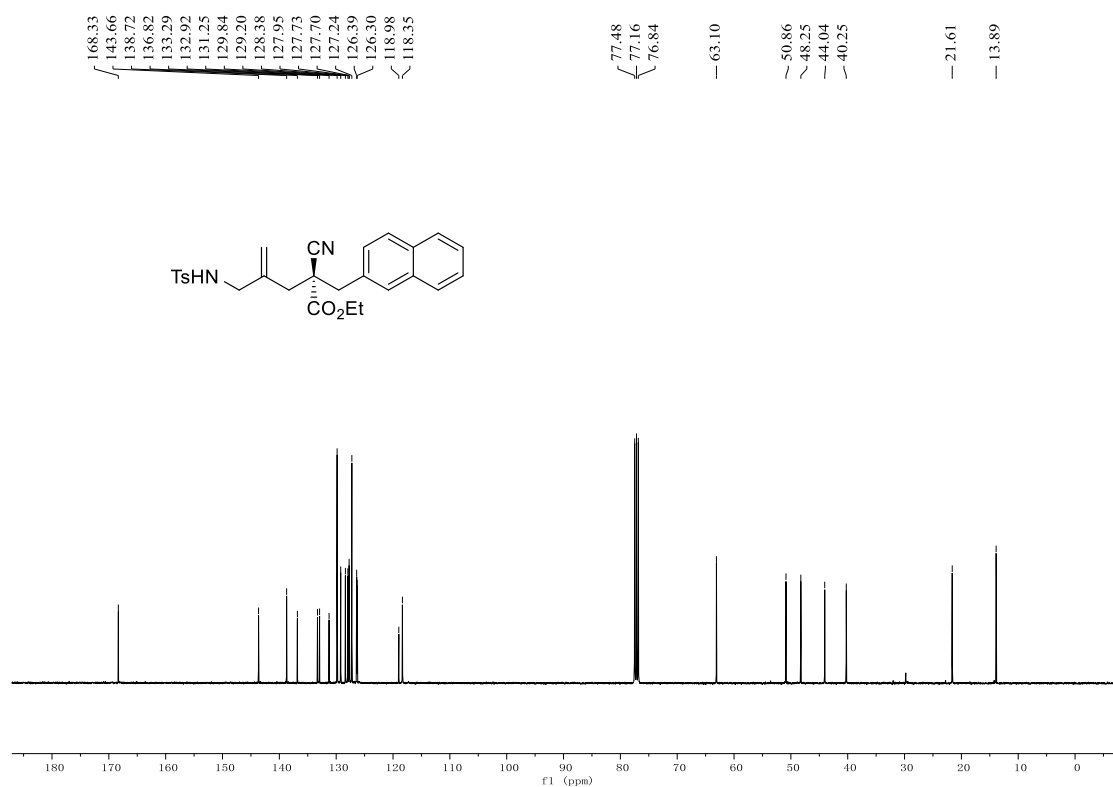



### HPLC spectra of 3s

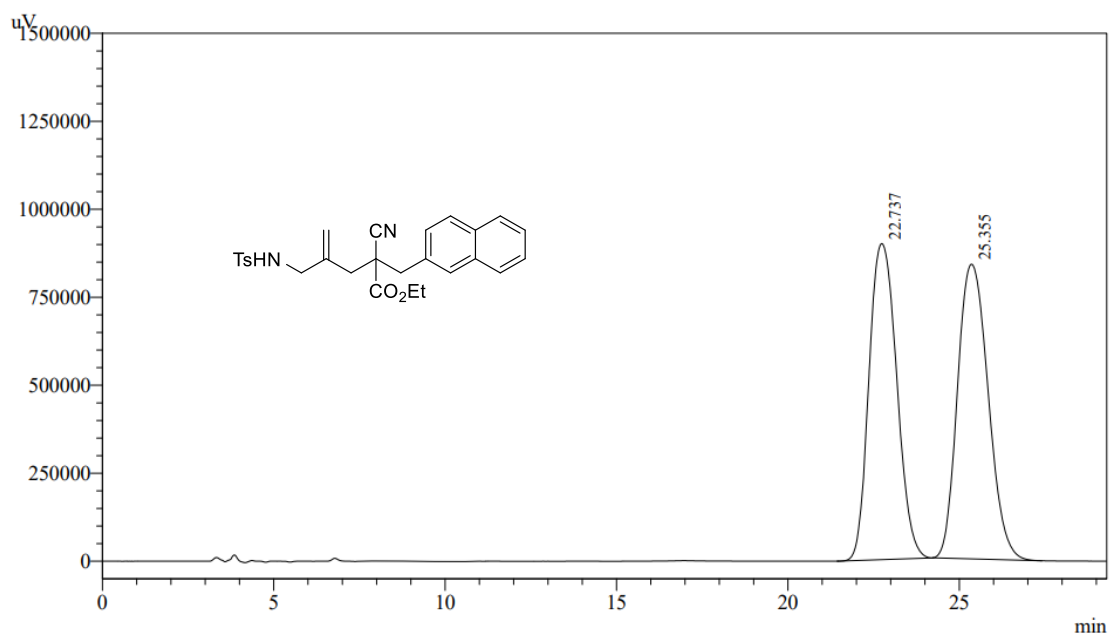

Detector A Ch1 220nm

| Peak# | Ret. Time | Area      | Height  | Area %  | Height % |
|-------|-----------|-----------|---------|---------|----------|
| 1     | 22.737    | 50448071  | 897963  | 49.208  | 51.747   |
| 2     | 25.355    | 52071016  | 837328  | 50.792  | 48.253   |
| Total |           | 102519087 | 1735291 | 100.000 | 100.000  |

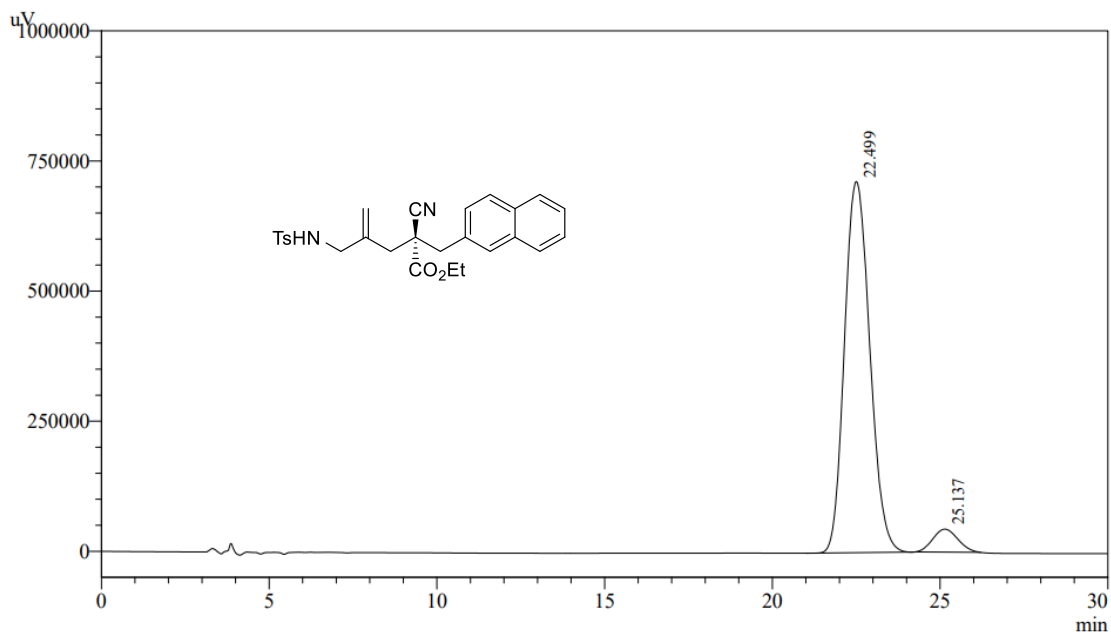

Detector A Ch1 220nm

| Peak# | Ret. Time | Area     | Height | Area %  | Height % |
|-------|-----------|----------|--------|---------|----------|
| 1     | 22.499    | 37429411 | 713036 | 94.243  | 94.177   |
| 2     | 25.137    | 2286579  | 44089  | 5.757   | 5.823    |
| Total |           | 39715990 | 757125 | 100.000 | 100.000  |

**<sup>1</sup>H NMR (400 MHz, CDCl<sub>3</sub>) and <sup>13</sup>C NMR (101 MHz, CDCl<sub>3</sub>) of 3t**

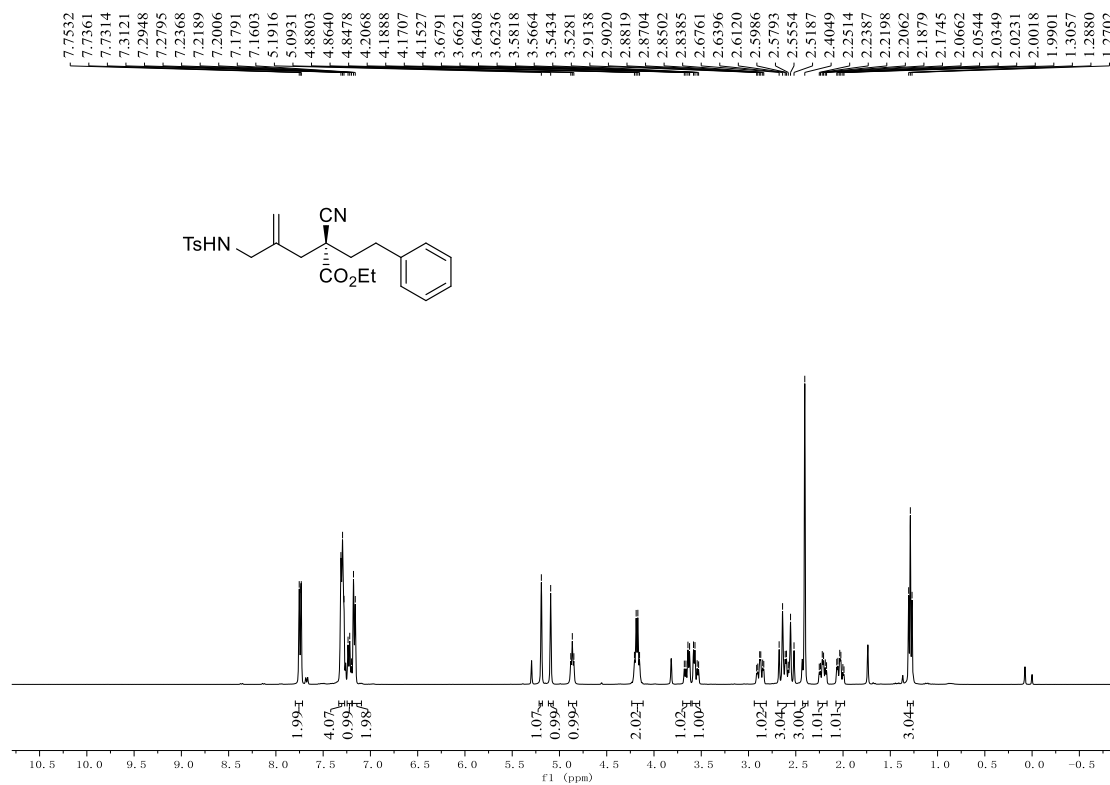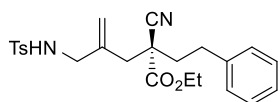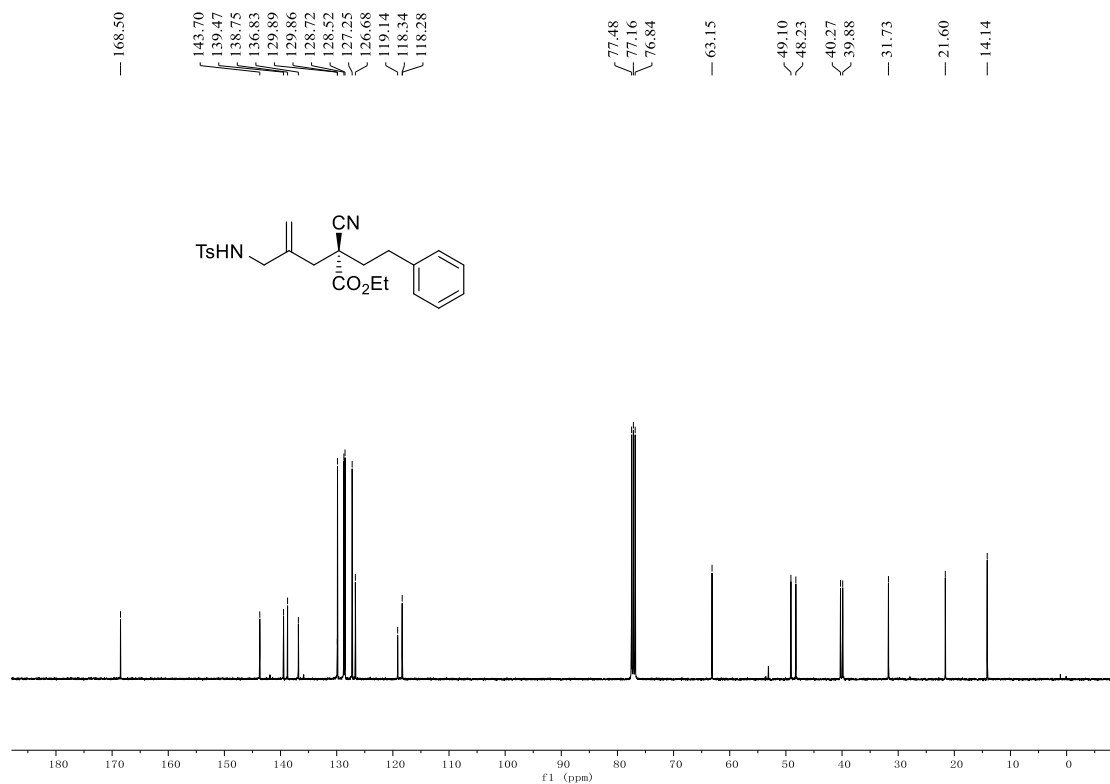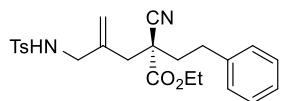

### HPLC spectra of 3t

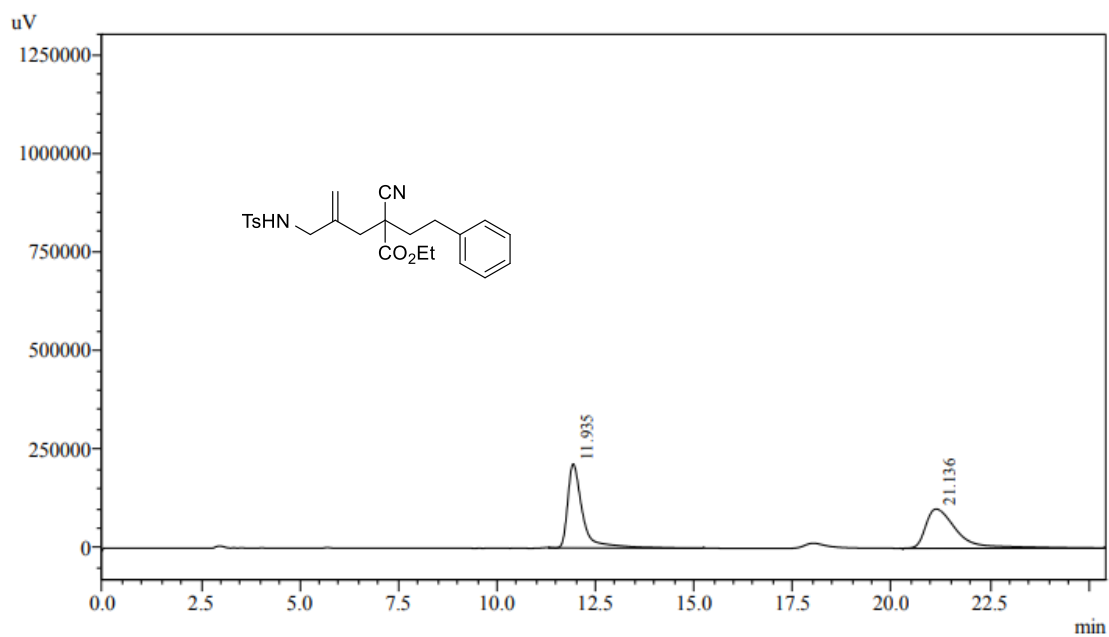

Detector A Ch1 220nm

| Peak# | Ret. Time | Area     | Height | Area %  | Height % |
|-------|-----------|----------|--------|---------|----------|
| 1     | 11.935    | 5529647  | 212237 | 50.363  | 68.091   |
| 2     | 21.136    | 5449963  | 99461  | 49.637  | 31.909   |
| Total |           | 10979610 | 311698 | 100.000 | 100.000  |

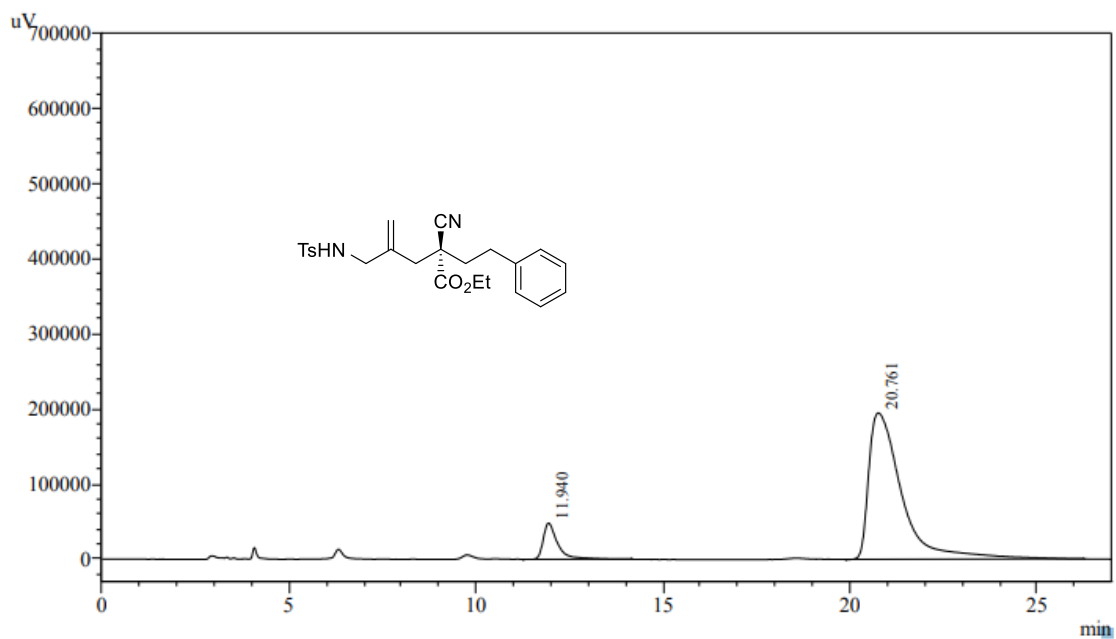

Detector A Ch1 220nm

| Peak# | Ret. Time | Area     | Height | Area %  | Height % |
|-------|-----------|----------|--------|---------|----------|
| 1     | 11.940    | 1283714  | 48054  | 9.653   | 19.758   |
| 2     | 20.761    | 12015199 | 195164 | 90.347  | 80.242   |
| Total |           | 13298914 | 243218 | 100.000 | 100.000  |

**<sup>1</sup>H NMR (400 MHz, CDCl<sub>3</sub>) and <sup>13</sup>C NMR (101 MHz, CDCl<sub>3</sub>) of 3u**

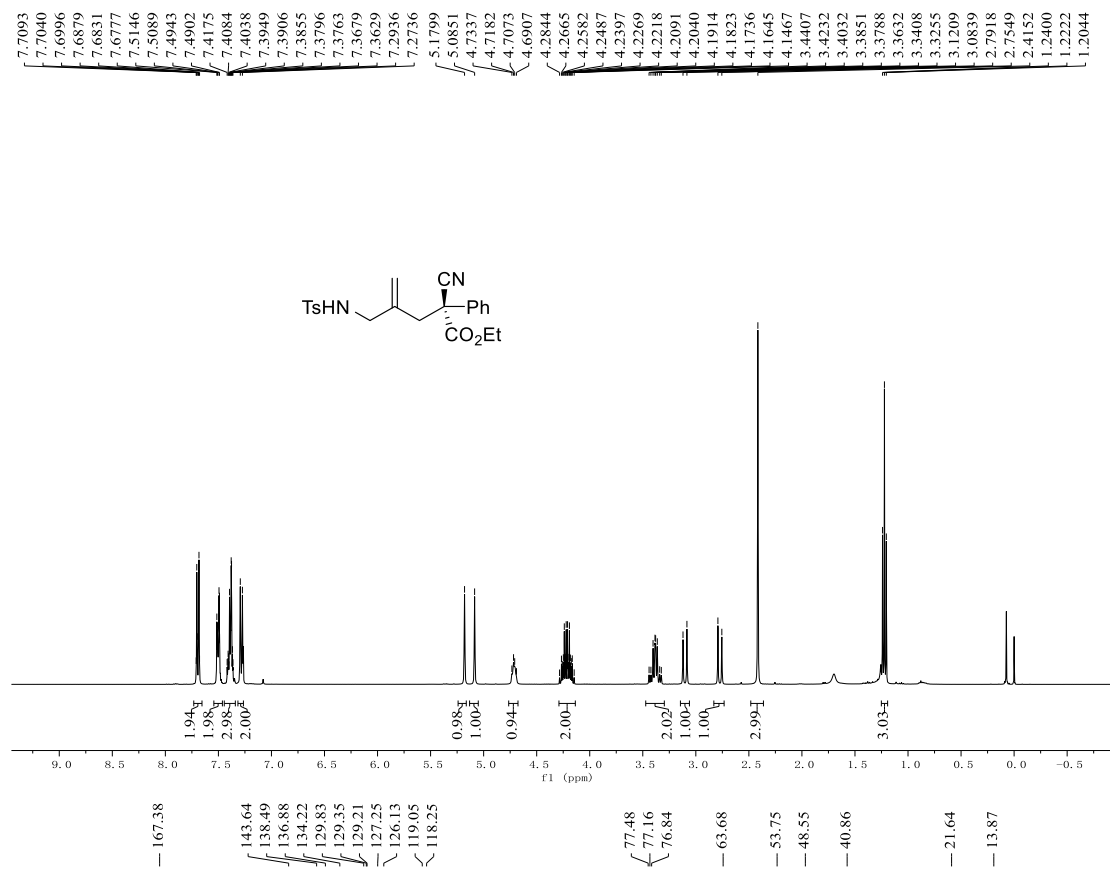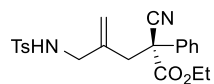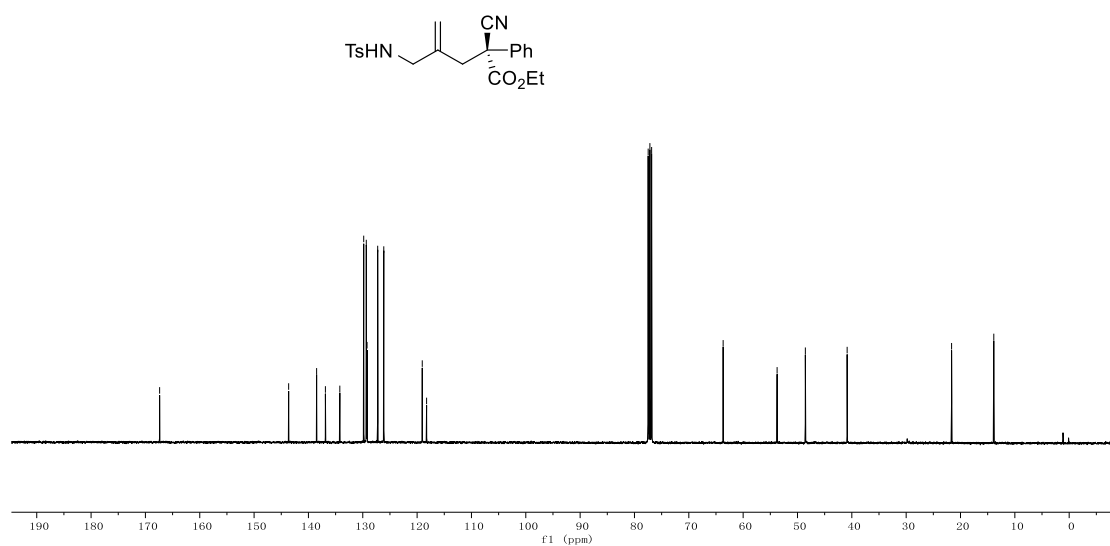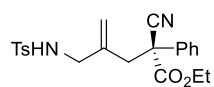

### HPLC spectra of 3u

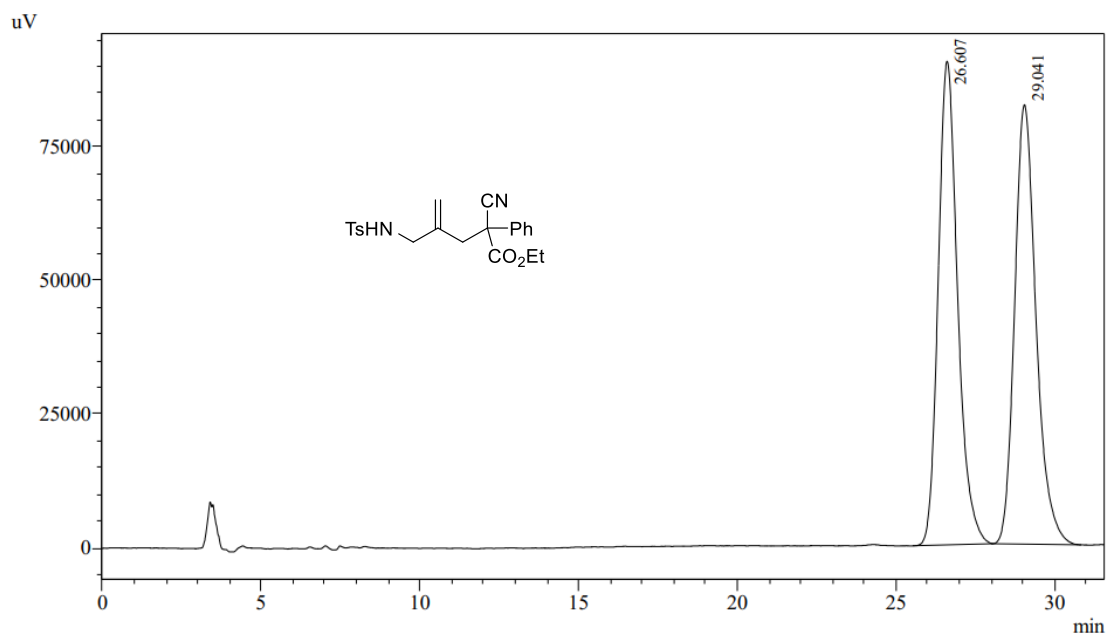

Detector A Ch1 220nm

| Peak# | Ret. Time | Area    | Height | Area %  | Height % |
|-------|-----------|---------|--------|---------|----------|
| 1     | 26.607    | 3850711 | 90380  | 50.007  | 52.398   |
| 2     | 29.041    | 3849609 | 82107  | 49.993  | 47.602   |
| Total |           | 7700320 | 172487 | 100.000 | 100.000  |

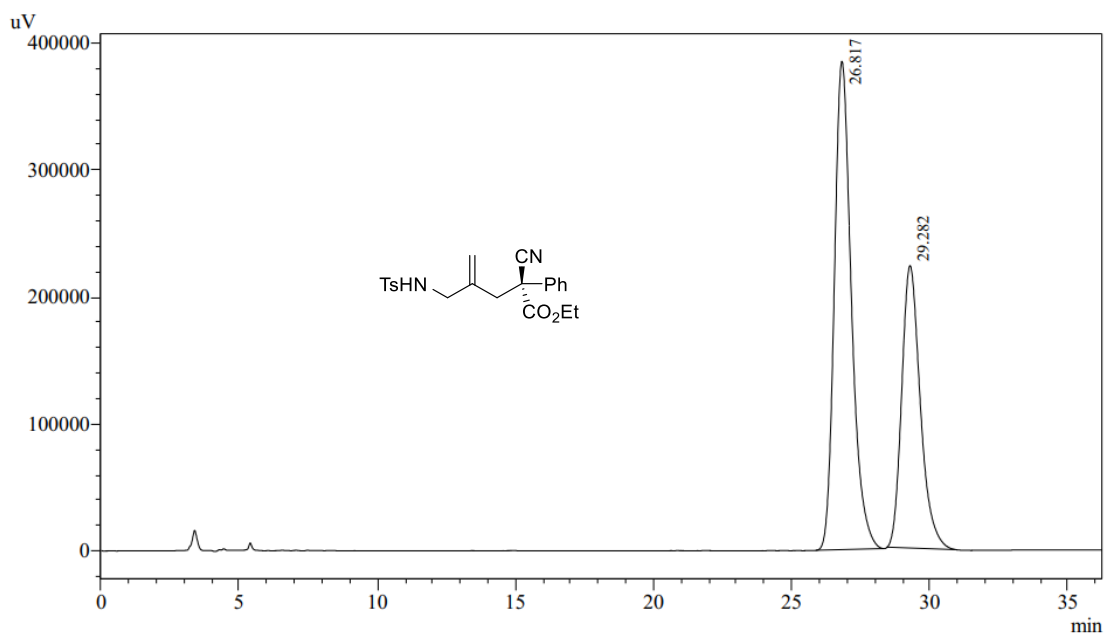

Detector A Ch1 220nm

| Peak# | Ret. Time | Area     | Height | Area %  | Height % |
|-------|-----------|----------|--------|---------|----------|
| 1     | 26.817    | 16525680 | 384628 | 61.369  | 63.364   |
| 2     | 29.282    | 10402732 | 222381 | 38.631  | 36.636   |
| Total |           | 26928412 | 607009 | 100.000 | 100.000  |

**<sup>1</sup>H NMR (400 MHz, D<sub>2</sub>O) and <sup>13</sup>C NMR (101 MHz, D<sub>2</sub>O) of 5**

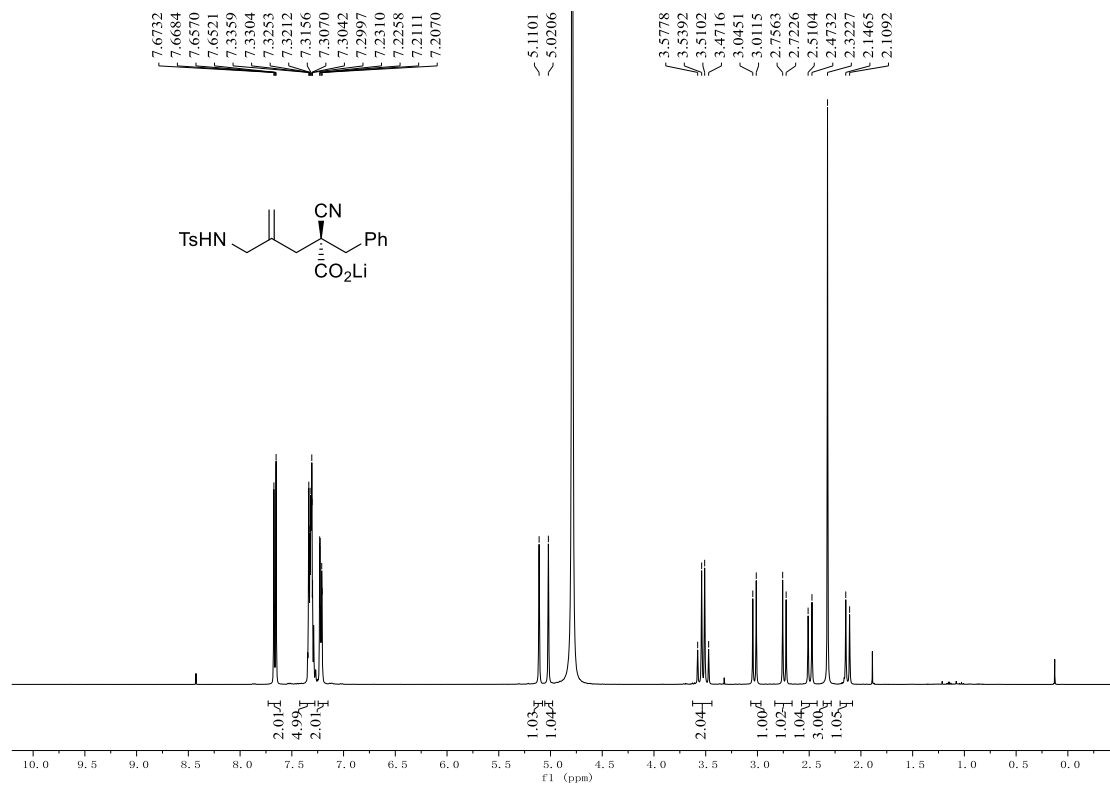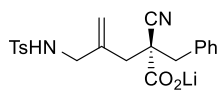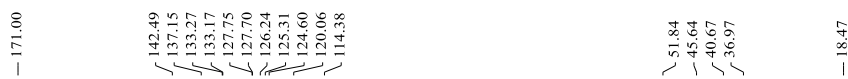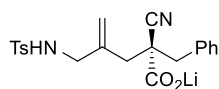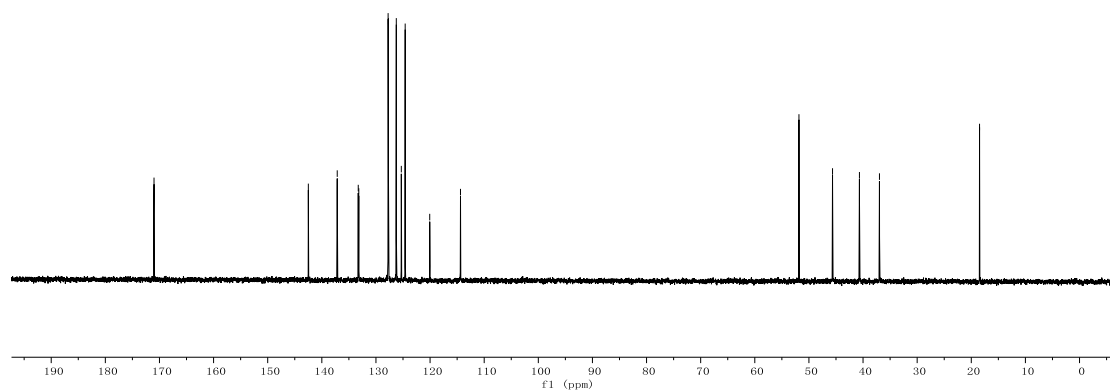

### HPLC spectra of 5

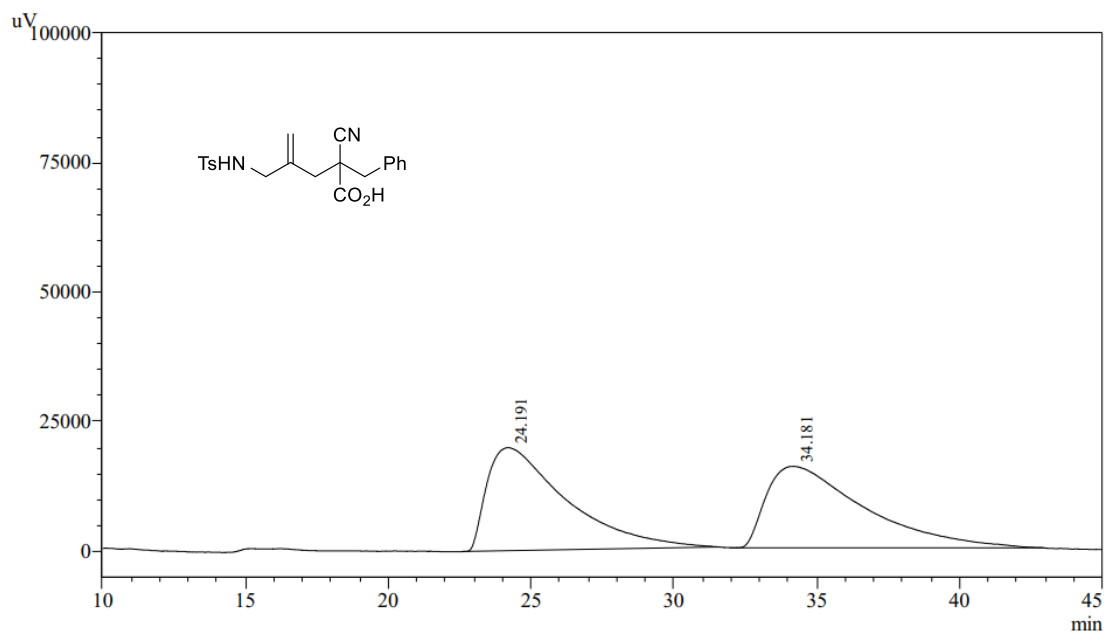

1 Det.A Ch1 / 220nm

Detector A Ch1 220nm

| Peak# | Ret. Time | Area    | Height | Area %  | Height % |
|-------|-----------|---------|--------|---------|----------|
| 1     | 24.191    | 3837259 | 19910  | 50.660  | 55.895   |
| 2     | 34.181    | 3737205 | 15711  | 49.340  | 44.105   |
| Total |           | 7574463 | 35621  | 100.000 | 100.000  |

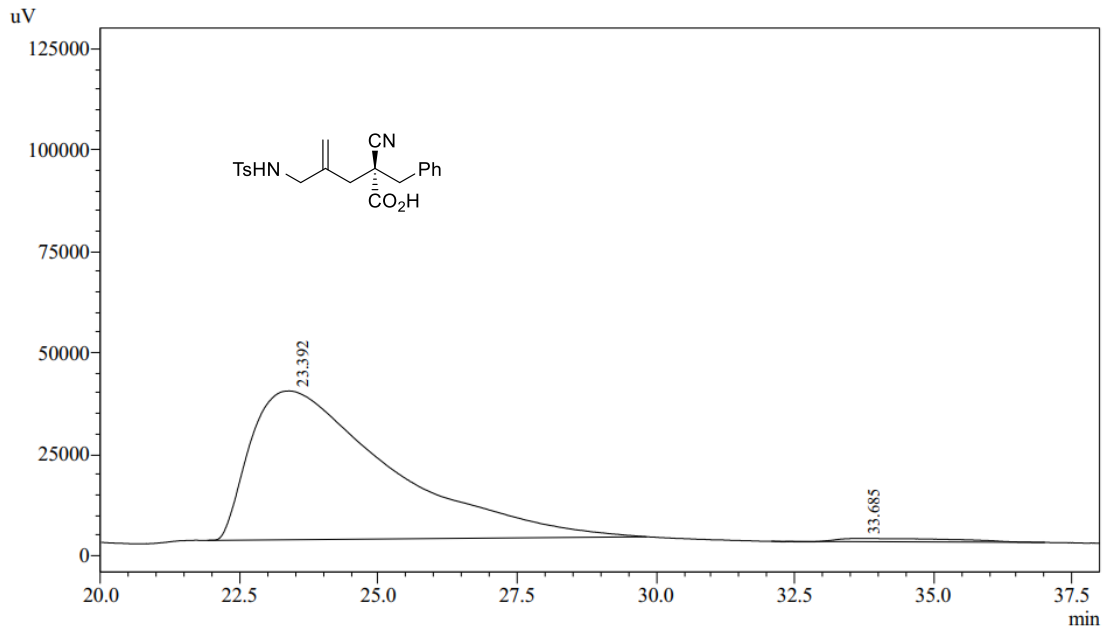

1 Det.A Ch1 / 220nm

Detector A Ch1 220nm

| Peak# | Ret. Time | Area    | Height | Area %  | Height % |
|-------|-----------|---------|--------|---------|----------|
| 1     | 23.392    | 6442667 | 36662  | 98.174  | 97.824   |
| 2     | 33.685    | 119800  | 816    | 1.826   | 2.176    |
| Total |           | 6562467 | 37477  | 100.000 | 100.000  |

**<sup>1</sup>H NMR (400 MHz, CDCl<sub>3</sub>) and <sup>13</sup>C NMR (101 MHz, CDCl<sub>3</sub>) of 6**

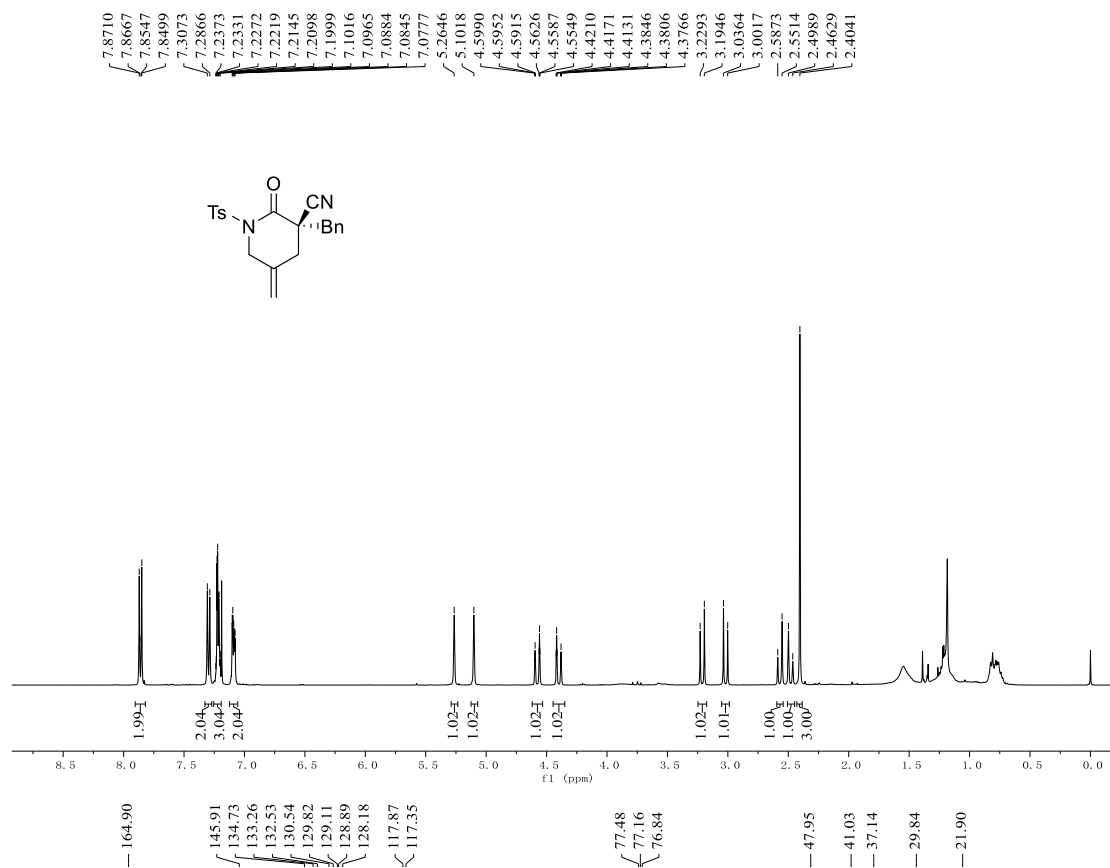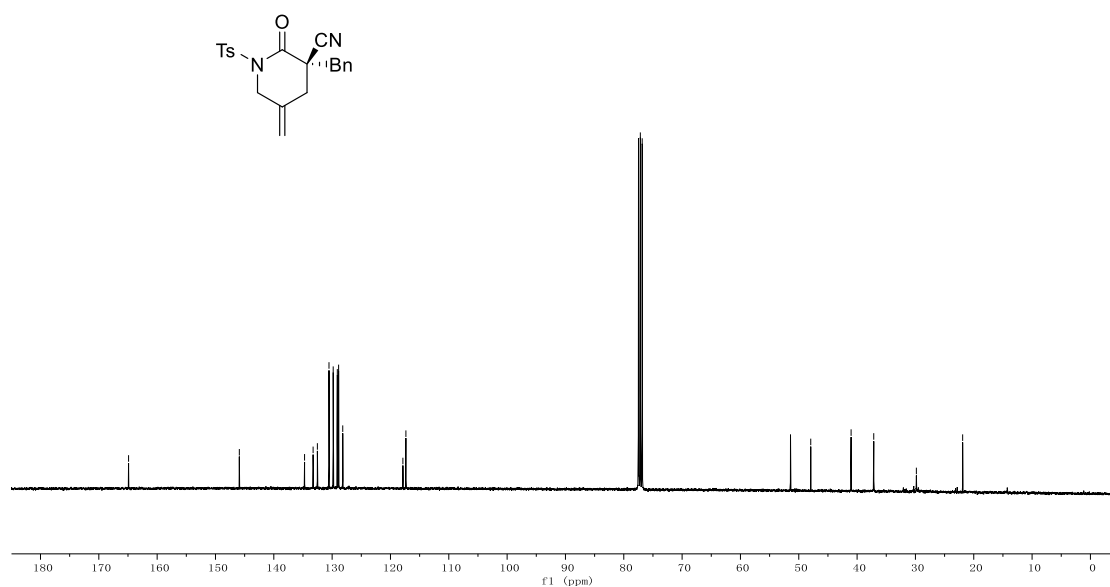



### HPLC spectra of 6

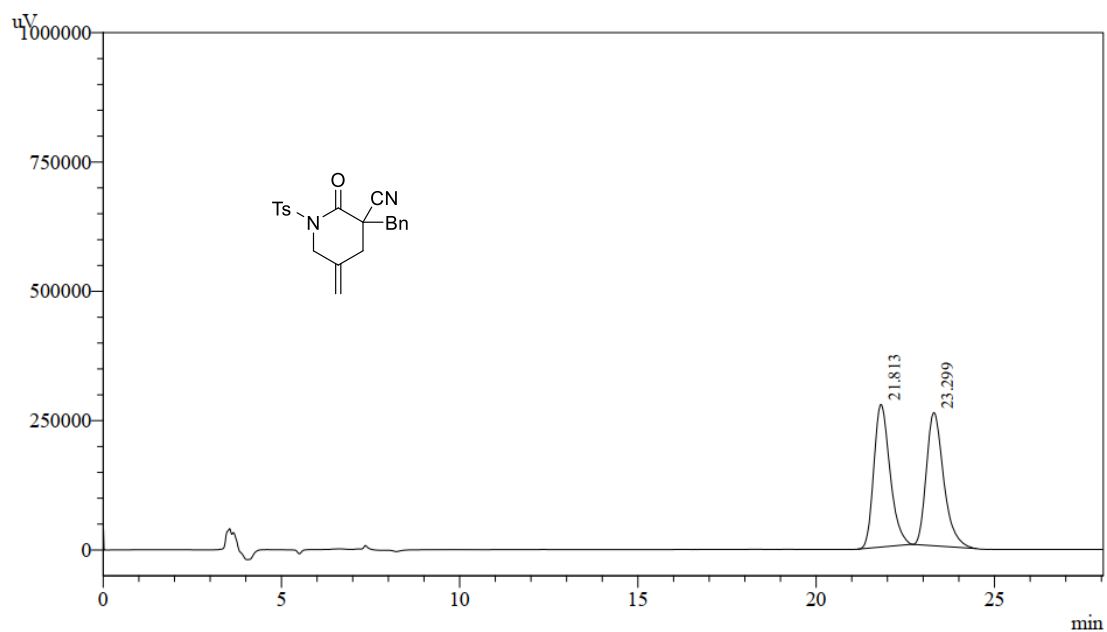

1 Det.A Ch1 / 220nm

Detector A Ch1 220nm

| Peak# | Ret. Time | Area     | Height | Area %  | Height % |
|-------|-----------|----------|--------|---------|----------|
| 1     | 21.813    | 8706508  | 275862 | 49.996  | 51.730   |
| 2     | 23.299    | 8707851  | 257407 | 50.004  | 48.270   |
| Total |           | 17414359 | 533269 | 100.000 | 100.000  |

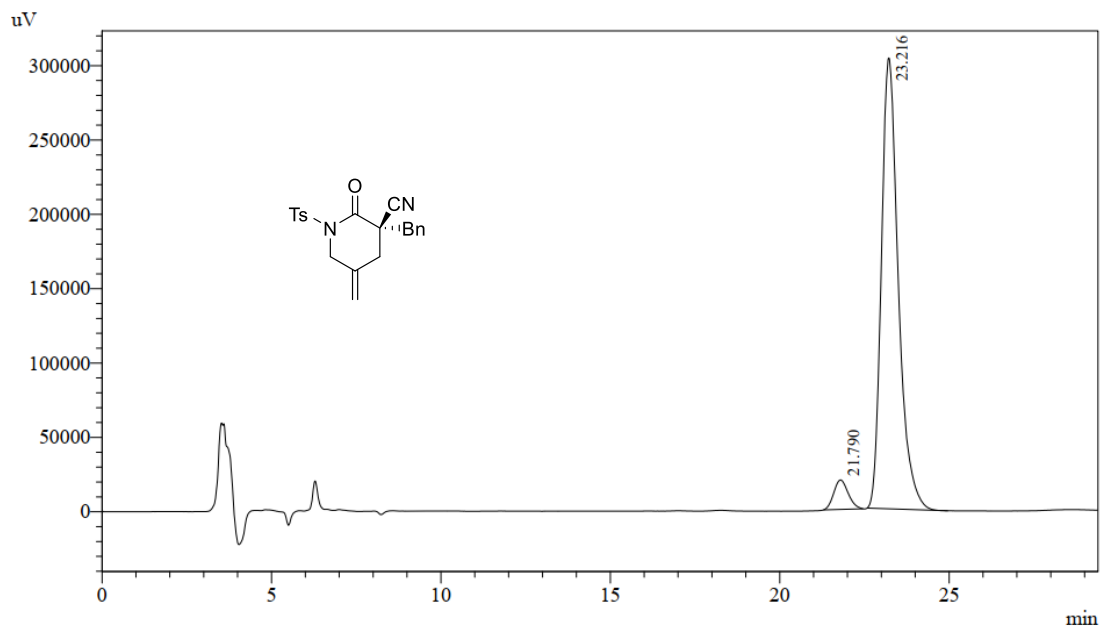

1 Det.A Ch1 / 220nm

Detector A Ch1 220nm

| Peak# | Ret. Time | Area     | Height | Area %  | Height % |
|-------|-----------|----------|--------|---------|----------|
| 1     | 21.790    | 583646   | 19785  | 5.246   | 6.127    |
| 2     | 23.216    | 10541408 | 303154 | 94.754  | 93.873   |
| Total |           | 11125054 | 322939 | 100.000 | 100.000  |
